# Supplementary material for: Pediatric Organ Dysfunction Information Update Mandate (PODIUM) Contemporary Organ Dysfunction Criteria: Executive Summary
Source: Oxford University Press journal article supplement (doi:10.1542/peds.2021-052888b), 2021-12-31
Supplement: peds_2021052888bsupplementarydata.pdf [file peds_2021052888bsupplementarydata.pdf]

Contemporary Organ Dysfunction Criteria: Executive Summary

Data Supplement

Table of Contents

| Content                                                                                                     | Pages |
|-------------------------------------------------------------------------------------------------------------|-------|
| <b>Supplemental Table 1.</b><br>PODIUM Organ Dysfunction Criteria: Search Strategies for Systematic Reviews | 2-35  |
| <b>Supplemental Table 2.</b><br>PODIUM Organ Dysfunction Criteria: Voting Results by Subtopic               | 36    |

**Supplemental Table 1. PODIUM Organ Dysfunction Criteria: Search Strategies for Systematic Reviews**

| <b>Multiple organ dysfunction</b>                                                                                                                                                                                                                                                                                                                                                                                                                                                                                                                                                                                                                                                                                                                                                                                                                                                                                                                                                                                                                                                                                                                                                                                                                                                                                                                                                                                                                                                                                                                                                                                                                                                                                                                                                                                                                                                                                                                                                                                                                                                                                                                                                                                                                                                                                                                                                                                                                                                                                                                                                                                                                                                                                                                                                                                                                                                                                                                                                                                                                                                                                                                                                                                                                                                                                                                                                                                                                                                                                                                                                                                                                                                                                                                                                                                                                                                                                                                                                                                                                                                                                                                                                                                                                                                                                                                                                                               |                                                                                             |
|-----------------------------------------------------------------------------------------------------------------------------------------------------------------------------------------------------------------------------------------------------------------------------------------------------------------------------------------------------------------------------------------------------------------------------------------------------------------------------------------------------------------------------------------------------------------------------------------------------------------------------------------------------------------------------------------------------------------------------------------------------------------------------------------------------------------------------------------------------------------------------------------------------------------------------------------------------------------------------------------------------------------------------------------------------------------------------------------------------------------------------------------------------------------------------------------------------------------------------------------------------------------------------------------------------------------------------------------------------------------------------------------------------------------------------------------------------------------------------------------------------------------------------------------------------------------------------------------------------------------------------------------------------------------------------------------------------------------------------------------------------------------------------------------------------------------------------------------------------------------------------------------------------------------------------------------------------------------------------------------------------------------------------------------------------------------------------------------------------------------------------------------------------------------------------------------------------------------------------------------------------------------------------------------------------------------------------------------------------------------------------------------------------------------------------------------------------------------------------------------------------------------------------------------------------------------------------------------------------------------------------------------------------------------------------------------------------------------------------------------------------------------------------------------------------------------------------------------------------------------------------------------------------------------------------------------------------------------------------------------------------------------------------------------------------------------------------------------------------------------------------------------------------------------------------------------------------------------------------------------------------------------------------------------------------------------------------------------------------------------------------------------------------------------------------------------------------------------------------------------------------------------------------------------------------------------------------------------------------------------------------------------------------------------------------------------------------------------------------------------------------------------------------------------------------------------------------------------------------------------------------------------------------------------------------------------------------------------------------------------------------------------------------------------------------------------------------------------------------------------------------------------------------------------------------------------------------------------------------------------------------------------------------------------------------------------------------------------------------------------------------------------------------------------|---------------------------------------------------------------------------------------------|
| 11/16/17 search<br>Total results: 1122<br>Duplicates: 232<br>Unique results: 890                                                                                                                                                                                                                                                                                                                                                                                                                                                                                                                                                                                                                                                                                                                                                                                                                                                                                                                                                                                                                                                                                                                                                                                                                                                                                                                                                                                                                                                                                                                                                                                                                                                                                                                                                                                                                                                                                                                                                                                                                                                                                                                                                                                                                                                                                                                                                                                                                                                                                                                                                                                                                                                                                                                                                                                                                                                                                                                                                                                                                                                                                                                                                                                                                                                                                                                                                                                                                                                                                                                                                                                                                                                                                                                                                                                                                                                                                                                                                                                                                                                                                                                                                                                                                                                                                                                                | 1/6/2020 search (2017-2020)<br>Total results: 421<br>Duplicates: 157<br>Unique results: 264 |
| <p><b>Pubmed:</b><br/>                     ("Multiple Organ Failure"[Mesh] OR "multiple organ failure" OR "multiple organ dysfunction" OR "MODS" OR "composite organ dysfunction"[tw] OR "PELOD-2" OR "pediatric logistic organ dysfunction-2" OR "P-MODS" OR "OFI" OR "organ failure index" OR "pSOFA" OR ("pediatric" AND "sequential organ failure assessment") OR "sepsis score" OR "organ dysfunction scores"[mh] OR "organ dysfunction scores" OR "organ failure assessment score" OR "organ failure assessment scores" OR "organ failure score" OR "organ failure scores")<br/>                     AND<br/>                     ("Child"[mh] OR "Infant"[mh:noexp] OR "Infant, Newborn"[mh:noexp] OR "infant, low birth weight"[mh] OR "infant, postmature"[mh] OR "Adolescent"[mh] OR "Child, Preschool"[mh] OR "child"[tiab] OR "infant"[all] OR "adolescent"[all] OR "children"[all] OR "infants"[all] OR "adolescents"[all] OR "pediatric patient"[all] OR "pediatric patients"[all] OR "adolescence"[all] OR "youth"[all] OR "youths"[all] OR "juvenile"[all] OR "childhood"[all] OR "teenager"[all] OR "teenagers"[all] OR "teen"[all] OR "teens"[all] OR "preschool child"[all] OR "neonate"[all] OR "newborn"[all] OR "baby"[all] OR "babies"[all] OR "pediatric"[tiab] OR "pediatrics"[tiab] OR "paediatric"[tiab] OR "paediatrics"[tiab] OR "toddler"[all] OR "toddlers"[all])<br/>                     AND<br/>                     ("Patient Outcome Assessment"[mh] OR "Critical Care Outcomes"[mh] OR "mortality"[mh] OR "length of stay"[mh] OR "quality of life"[mh] OR "outcome"[tw] OR "mortality"[tw] OR "length of stay"[tw] OR "LOS"[tw] OR "quality of life"[tw] OR "PedsQL"[tw] OR "functional morbidity"[tw] OR "PCPC"[tw] OR "pediatric cerebral performance category"[tw] OR "POPC"[tw] OR "pediatric overall performance category"[tw] OR "FSS"[tw] OR "functional status scale"[tw] OR "WeeFIM"[tw] OR "PEDI"[tw] OR ("pediatric evaluation" AND "disability inventory") OR "MSEL"[tw] OR "mullen scales"[tw] OR "WISC"[tiab] OR "wechsler intelligence scale"[tw] OR "BSID"[tw] OR "bayley scales"[tw] OR "VABS"[tw] OR "vineland adaptive behavior scale"[tw] OR "Depression/diagnosis"[mh] OR "depression"[tiab] OR "PTSD"[tw] OR "post-traumatic stress disorder"[tw] OR "post-traumatic stress"[tw] OR "Stress Disorders, Post-Traumatic"[mh] OR "Stress Disorders, Traumatic, Acute"[mh] OR "acute stress disorder"[tw] OR "acute traumatic stress disorder"[tw] OR "tracheostomy"[mh] OR "tracheostomy"[tw] OR "Gastrostomy"[mh] OR "gastrostomy"[tw] OR "gastric tube"[tw] OR "NPMODS"[tw] OR "progressive multiple organ dysfunction"[tw] OR "organ dysfunction resolution"[tw] OR "cost of medical care"[tw] OR "health care costs"[mh] OR "symptom improvement"[tw] OR "duration of life"[tw] OR "quality of dying"[tw] OR "quality of death"[tw] OR "Quality-adjusted life years"[mh] OR "neurocognitive"[tw] OR "neuro-cognitive"[tw] OR "neuro cognitive"[tw] OR "neurocognition"[tw] OR "neurodevelopmental"[tw] OR "neuro-developmental"[tw] OR "neuro developmental"[tw] OR "neurodevelopment"[tw] OR "neuro-development"[tw] OR "neuro development"[tw] OR "neurologic"[tw] OR "neurological"[tw] OR "cognitive"[tw] OR "HRQOL"[tw] OR "functional outcome"[tw] OR "functional outcomes"[tw] OR "pediatric stroke outcome measures"[tw] OR "Glasgow Outcome Score"[tw] OR "GOS"[tw] OR "extracorporeal life support"[tw] OR ("waiting lists"[mh] AND "heart transplantation"[mh]) OR "extracorporeal membrane oxygenation"[mh] OR "extracorporeal membrane oxygenation"[tw] OR "ECMO"[tw] OR "mechanical circulatory support"[tw] OR "left ventricular assist device"[tw] OR "LVAD"[tw] OR "ventilator free"[tw] OR "VFD"[tw] OR "inotrope dependency"[tw] OR "mechanical support"[tw] OR "seizures"[mh] OR "seizure"[tw] OR "seizures"[tw] OR "pedNIHSS"[tw] OR "pediatric NIH Stroke Scale"[tw] OR "neurologic disability"[tw] OR "neurological disability"[tw])<br/>                     AND<br/>                     ("predictive value of tests"[mh] OR "sensitivity and specificity"[mh] OR "False Negative Reactions"[mh] OR "False Positive Reactions"[mh] OR "specificity" OR "false negative" OR "false positive" OR "predict" OR "predicting" OR "predictive" OR "prediction" OR "predictor" OR "accurate" OR "accuracy" OR "precision" OR</p> |                                                                                             |

"precise" OR "validity" OR "reliability" OR "discrimination" OR "calibration" OR "sensitivity to change" OR "goodness of fit")

NOT ("editorial"[pt] OR "guideline"[pt] OR "letter"[pt] OR "review"[pt] OR "meta-analysis"[pt])

Searched 11/16/17, 383 results

Searched 1/6/2020, 108 results

**Embase:**

('multiple organ failure'/exp OR 'multiple organ failure' OR 'multiple organ dysfunction' OR 'MODS' OR 'composite organ dysfunction' OR 'PELOD-2' OR 'pediatric logistic organ dysfunction-2' OR 'P-MODS' OR 'OFI' OR 'organ failure index' OR 'pSOFA' OR ('pediatric' AND 'sequential organ failure assessment') OR 'sepsis score' OR 'organ dysfunction score'/exp OR 'organ dysfunction scores' OR 'organ failure assessment score' OR 'organ failure assessment scores' OR 'organ failure score' OR 'organ failure scores')

AND

('Child'/de OR 'Infant'/de OR 'Adolescent'/de OR 'preschool child'/exp OR 'child':ti,ab OR 'infant':ti,ab OR 'adolescent' OR 'children' OR 'infants' OR 'adolescents' OR 'pediatric patient' OR 'pediatric patients' OR 'adolescence' OR 'youth' OR 'youths' OR 'juvenile'/exp OR 'juvenile' OR 'childhood' OR 'teenager' OR 'teenagers' OR 'teen' OR 'teens' OR 'preschool child' OR 'neonate' OR 'newborn'/de OR 'newborn':ti,ab OR 'baby' OR 'babies' OR 'pediatric':ti,ab OR 'pediatrics':ti,ab OR 'paediatric':ti,ab OR 'paediatrics':ti,ab OR 'toddler'/exp OR 'toddler' OR 'toddlers')

AND

('Outcome Assessment'/exp OR 'Critical Care Outcome'/exp OR 'mortality'/exp OR 'length of stay'/exp OR 'quality of life'/exp OR 'outcome' OR 'mortality' OR 'length of stay' OR 'LOS' OR 'quality of life' OR 'PedsQL' OR 'functional morbidity' OR 'PCPC' OR 'pediatric cerebral performance category' OR 'POPC' OR 'pediatric overall performance category' OR 'FSS' OR 'functional status scale' OR 'WeeFIM' OR 'PEDI' OR ('pediatric evaluation' AND 'disability inventory') OR 'MSEL' OR 'mullen scales' OR 'WISC':ti,ab OR 'wechsler intelligence scale' OR 'BSID' OR 'bayley scales' OR 'VABS' OR 'vineland adaptive behavior scale' OR 'Depression assessment'/exp OR 'depression':ti,ab OR 'PTSD' OR 'post-traumatic stress disorder' OR 'post-traumatic stress' OR 'posttraumatic stress disorder'/exp OR 'acute stress disorder'/exp OR 'acute stress disorder' OR 'acute traumatic stress disorder' OR 'tracheostomy'/exp OR 'tracheostomy' OR 'Gastrostomy'/exp OR 'gastrostomy' OR 'stomach tube'/exp OR 'gastric tube' OR 'NPMODS' OR 'progressive multiple organ dysfunction' OR 'organ dysfunction resolution' OR 'cost of medical care' OR 'health care costs'/exp OR 'symptom improvement' OR 'duration of life' OR 'quality of dying' OR 'quality of death' OR 'Quality adjusted life year'/exp OR 'neurocognitive' OR 'neuro-cognitive' OR 'neuro cognitive' OR 'neurocognition' OR 'neurodevelopmental' OR 'neuro-developmental' OR 'neuro developmental' OR 'neurodevelopment' OR 'neuro-development' OR 'neuro development' OR 'neurologic' OR 'neurological' OR 'cognitive' OR 'HRQOL' OR 'functional outcome' OR 'functional outcomes' OR 'pediatric stroke outcome measures' OR 'Glasgow Outcome Score' OR 'GOS' OR 'extracorporeal life support' OR ('waiting lists' AND 'heart transplantation'/exp) OR 'extracorporeal oxygenation'/exp OR 'extracorporeal membrane oxygenation' OR 'ECMO' OR 'mechanical circulatory support' OR 'left ventricular assist device' OR 'LVAD' OR 'ventilator free' OR 'VFD' OR 'inotrope dependency' OR 'mechanical support' OR 'seizure'/exp OR 'seizure' OR 'seizures' OR 'pedNIHSS' OR 'pediatric NIH Stroke Scale' OR 'neurologic disability' OR 'neurological disability')

AND

('predictive value'/exp OR 'sensitivity and specificity'/exp OR 'False Negative result'/exp OR 'False Positive result'/exp OR 'specificity' OR 'false negative' OR 'false positive' OR 'predict' OR 'predicting' OR 'predictive' OR 'prediction' OR 'predictor' OR 'accurate' OR 'accuracy' OR 'precision' OR 'precise' OR 'validity' OR 'reliability' OR 'discrimination' OR 'calibration' OR 'sensitivity to change' OR 'goodness of fit')

NOT ('editorial'/it OR 'letter'/it OR 'note'/it OR 'review'/it OR 'chapter'/it)

Searched 11/16/2017, 739 results

Searched 1/6/2020, 313 results

**Acute brain dysfunction**

11/21/17 search

1/9/2020 update (2017-2020)

|                                                                                                                                                                                                                                                 |                                                                                                                                                                                                                                                |
|-------------------------------------------------------------------------------------------------------------------------------------------------------------------------------------------------------------------------------------------------|------------------------------------------------------------------------------------------------------------------------------------------------------------------------------------------------------------------------------------------------|
| Total results: 20,010<br>Duplicate results: 5358<br>Removed references with "adult" OR "adults" in the keyword field in Endnote: 8367<br>Unique results to Covidence: 6285<br>Covidence dedupes: 19<br>Total for title/abstract screening: 6266 | Total results: 4820<br>Duplicate results: 1059<br>Removed references with "adult" OR "adults" in the keyword field in Endnote: 2003<br>Unique results to Covidence: 1758<br>Covidence dedupes: 416<br>Total for title/abstract screening: 1342 |
|-------------------------------------------------------------------------------------------------------------------------------------------------------------------------------------------------------------------------------------------------|------------------------------------------------------------------------------------------------------------------------------------------------------------------------------------------------------------------------------------------------|

**Pubmed:**

("Brain Hemorrhage, Traumatic"[mh] OR "Brain Stem Hemorrhage, Traumatic"[mh] OR "Cerebral Hemorrhage, Traumatic"[mh] OR "traumatic brain injury"[tiab] OR "traumatic brain injuries"[tiab] OR "head injury"[tiab] OR "head injuries"[tiab] OR "Brain injuries"[mh:noexp] OR "brain injury"[tiab] OR "brain injuries"[tiab] OR "Stroke"[mh] OR "stroke"[tiab] OR "strokes"[tiab] OR "cerebrovascular accident"[tiab] OR "cerebrovascular accidents"[tiab] OR "cerebral infarction"[mh] OR "cerebral infarction"[tiab] OR "cerebral infarct"[tiab] OR "cerebral infarcts"[tiab] OR "brain infarction"[tiab] OR "brain infarctions"[tiab] OR "brain infarct"[tiab] OR "brain infarcts"[tiab] OR "brain hemorrhage"[tiab] OR "brain haemorrhage"[tiab] OR "brain hemorrhages"[tiab] OR "brain haemorrhages"[tiab] OR "cerebral hemorrhage"[mh] OR "cerebral hemorrhage"[tiab] OR "cerebral haemorrhage"[tiab] OR "cerebral hemorrhages"[tiab] OR "cerebral haemorrhages"[tiab] OR "brain edema"[mh] OR "brain edema"[tiab] OR "cerebral edema"[tiab] OR "cerebral edemas"[tiab] OR "cerebral oedema"[tiab] OR "cerebral oedemas"[tiab] OR "intracranial hemorrhages"[mh] OR "intracranial hemorrhages"[tiab] OR "intracranial hemorrhage"[tiab] OR "intracranial haemorrhage"[tiab] OR "intracranial haemorrhages"[tiab] OR "intra-cranial hemorrhages"[tiab] OR "intra-cranial hemorrhage"[tiab] OR "intra cranial hemorrhages"[tiab] OR "intra cranial hemorrhage"[tiab] OR "transient ischaemic attack"[tiab] OR "transient ischemic attack"[tiab] OR "TIA"[tiab] OR "subarachnoid hemorrhage"[tiab] OR "subarachnoid haemorrhage"[tiab] OR "subarachnoid hemorrhages"[tiab] OR "subarachnoid haemorrhages"[tiab] OR "ventriculoperitoneal shunt"[mh] OR "ventriculoperitoneal shunt"[tiab] OR "ventriculo peritoneal shunt"[tiab] OR "ventriculoperitoneal shunts"[tiab] OR "ventriculo peritoneal shunts"[tiab] OR "arteriovenous malformations"[mh] OR "arteriovenous malformations"[tiab] OR "arteriovenous malformation"[tiab] OR "AVM"[tiab] OR "Aneurysm"[mh] OR "aneurysm"[tiab] OR "aneurysms"[tiab] OR "Brain Neoplasms"[mh] OR "brain neoplasms"[tiab] OR "brain neoplasm"[tiab] OR "brain tumour"[tiab] OR "brain tumours"[tiab] OR "brain tumor"[tiab] OR "brain tumors"[tiab] OR "hepatic encephalopathy scale"[tw] OR "PSOM"[TW] OR "pediatric stroke outcome measure"[TW] OR "four score"[TW] OR "STESS"[TW] OR "status epilepticus severity score"[TW] OR "EMSE"[TW] OR ("epidemiology based mortality score" AND "status epilepticus") OR "GCS"[TW] OR "Glasgow coma score"[TW] OR "pupillary reaction"[TW] OR "pupil reflex"[TW] OR "delirium"[mh] OR "delirium"[TW] OR "CAPD"[TW] OR ("Cornell Assessment" AND "Pediatric Delirium") OR "P-CAM"[TW] OR "pediatric confusion assessment method"[tw] OR "pCAM-ICU"[TW] OR "preschool confusion assessment method"[tw] OR "psCAM-ICU"[TW] OR ("Confusion method"[tw] AND "ICU") OR "CAM-ICU"[TW] OR "EEG"[TW] OR "electroencephalography"[mh] OR "electroencephalography"[TW] OR "electroencephalogram"[TW] OR ("impairment" AND ("consciousness"[mh] OR "consciousness"[tiab])) OR "altered mental status"[TW] OR "persistent vegetative state"[mh] OR "vegetative state"[TW] OR "coma"[mh:noexp] OR "coma, post-head injury"[mh] OR "coma"[tw])

AND

("Child"[mh] OR "Infant"[mh] OR "Infant, Newborn"[mh:noexp] OR "infant, low birth weight"[mh] OR "infant, postmature"[mh] OR "Adolescent"[mh] OR "Child, Preschool"[mh] OR "child"[tiab] OR "infant"[tw] OR "adolescent"[tw] OR "children"[tw] OR "infants"[tw] OR "adolescents"[tw] OR "pediatric patient"[tw] OR "pediatric patients"[tw] OR "adolescence"[tw] OR "youth"[tw] OR "youths"[tw] OR "juvenile"[tw] OR "childhood"[tw] OR "teenager"[tw] OR "teenagers"[tw] OR "teen"[tw] OR "teens"[tw] OR "preschool child"[tw] OR "neonate"[tw] OR "newborn"[tw] OR "baby"[tw] OR "babies"[tw] OR "pediatric"[tiab] OR "pediatrics"[tiab] OR "paediatric"[tiab] OR "paediatrics"[tiab] OR "toddler"[tw] OR "toddlers"[tw])

AND

("Patient Outcome Assessment"[mh] OR "Critical Care Outcomes"[mh] OR "mortality"[mh] OR "length of stay"[mh] OR "quality of life"[mh] OR "outcome"[tw] OR "mortality"[tw] OR "length of stay"[tw] OR "LOS"[tw] OR "quality of life"[tw] OR "PedsQL"[tw] OR "functional morbidity"[tw] OR "PCPC"[tw] OR "pediatric cerebral performance category"[tw] OR "POPC"[tw] OR "pediatric overall performance category"[tw] OR "FSS"[tw])

OR "functional status scale"[tw] OR "WeeFIM"[tw] OR "PEDI"[tw] OR ("pediatric evaluation" AND "disability inventory") OR "MSEL"[tw] OR "mullen scales"[tw] OR "WISC"[tiab] OR "wechsler intelligence scale"[tw] OR "BSID"[tw] OR "bayley scales"[tw] OR "VABS"[tw] OR "vineland adaptive behavior scale"[tw] OR "Depression/diagnosis"[mh] OR "depression"[tiab] OR "PTSD"[tw] OR "post-traumatic stress disorder"[tw] OR "post-traumatic stress"[tw] OR "Stress Disorders, Post-Traumatic"[mh] OR "Stress Disorders, Traumatic, Acute"[mh] OR "acute stress disorder"[tw] OR "acute traumatic stress disorder"[tw] OR "tracheostomy"[mh] OR "tracheostomy"[tw] OR "Gastrostomy"[mh] OR "gastrostomy"[tw] OR "gastric tube"[tw] OR "NPMODS"[tw] OR "progressive multiple organ dysfunction"[tw] OR "organ dysfunction resolution"[tw] OR "cost of medical care"[tw] OR "health care costs"[mh] OR "symptom improvement"[tw] OR "duration of life"[tw] OR "quality of dying"[tw] OR "quality of death"[tw] OR "Quality-adjusted life years"[mh] OR "neurocognitive"[tw] OR "neuro-cognitive"[tw] OR "neuro cognitive"[tw] OR "neurocognition"[tw] OR "neurodevelopmental"[tw] OR "neuro-developmental"[tw] OR "neuro developmental"[tw] OR "neurodevelopment"[tw] OR "neuro-development"[tw] OR "neuro development"[tw] OR "neurologic"[tw] OR "neurological"[tw] OR "cognitive"[tw] OR "HRQOL"[tw] OR "functional outcome"[tw] OR "functional outcomes"[tw] OR "pediatric stroke outcome measures"[tw] OR "Glasgow Outcome Score"[tw] OR "GOS"[tw] OR "extracorporeal life support"[tw] OR ("waiting lists"[mh] AND "heart transplantation"[mh]) OR "extracorporeal membrane oxygenation"[mh] OR "extracorporeal membrane oxygenation"[tw] OR "ECMO"[tw] OR "mechanical circulatory support"[tw] OR "left ventricular assist device"[tw] OR "LVAD"[tw] OR "ventilator free"[tw] OR "VFD"[tw] OR "inotrope dependency"[tw] OR "mechanical support"[tw] OR "seizures"[mh] OR "seizure"[tw] OR "seizures"[tw] OR "pedNiHSS"[tw] OR "pediatric NIH Stroke Scale"[tw] OR "neurologic disability"[tw] OR "neurological disability"[tw])

AND

("predictive value of tests"[mh] OR "sensitivity and specificity"[mh] OR "False Negative Reactions"[mh] OR "False Positive Reactions"[mh] OR "specificity"[tw] OR "false negative"[tw] OR "false positive"[tw] OR "predict"[tw] OR "predicting"[tw] OR "predictive"[tw] OR "prediction"[tw] OR "predictor"[tw] OR "accurate"[tw] OR "accuracy"[tw] OR "precision"[tw] OR "precise"[tw] OR "validity"[tw] OR "reliability"[tw] OR "discrimination"[tw] OR "calibration"[tw] OR "sensitivity to change"[tw] OR "goodness of fit"[tw]) NOT ("editorial"[pt] OR "guideline"[pt] OR "letter"[pt] OR "review"[pt] OR "meta-analysis"[pt])

Searched 11/21/2017, 9412 results

Searched 1/9/2020, 1973 results

#### **Embase:**

('Brain Hemorrhage'/exp OR 'traumatic brain injury':ti,ab OR 'traumatic brain injuries':ti,ab OR 'head injury':ti,ab OR 'head injuries':ti,ab OR 'Brain injury'/de OR 'traumatic brain injury'/exp OR 'brain injury':ti,ab OR 'brain injuries':ti,ab OR 'cerebrovascular accident'/exp OR 'stroke':ti,ab OR 'strokes':ti,ab OR 'cerebrovascular accident':ti,ab OR 'cerebrovascular accidents':ti,ab OR 'brain infarction'/exp OR 'cerebral infarction':ti,ab OR 'cerebral infarct':ti,ab OR 'cerebral infarcts':ti,ab OR 'brain infarction':ti,ab OR 'brain infarctions':ti,ab OR 'brain infarct':ti,ab OR 'brain infarcts':ti,ab OR 'brain hemorrhage':ti,ab OR 'brain haemorrhage':ti,ab OR 'brain hemorrhages':ti,ab OR 'brain haemorrhages':ti,ab OR 'cerebral hemorrhage':ti,ab OR 'cerebral haemorrhage':ti,ab OR 'cerebral hemorrhages':ti,ab OR 'cerebral haemorrhages':ti,ab OR 'brain edema'/exp OR 'brain edema':ti,ab OR 'cerebral edema':ti,ab OR 'cerebral edemas':ti,ab OR 'cerebral oedema':ti,ab OR 'cerebral oedemas':ti,ab OR 'intracranial hemorrhages':ti,ab OR 'intracranial hemorrhage':ti,ab OR 'intracranial haemorrhages':ti,ab OR 'intra-cranial hemorrhages':ti,ab OR 'intra-cranial hemorrhage':ti,ab OR 'intra-cranial haemorrhages':ti,ab OR 'intra cranial hemorrhages':ti,ab OR 'intra cranial hemorrhage':ti,ab OR 'intra cranial haemorrhage':ti,ab OR 'transient ischaemic attack':ti,ab OR 'transient ischemic attack':ti,ab OR 'TIA':ti,ab OR 'subarachnoid hemorrhage':ti,ab OR 'subarachnoid haemorrhage':ti,ab OR 'subarachnoid hemorrhages':ti,ab OR 'subarachnoid haemorrhages':ti,ab OR 'brain ventricle peritoneum shunt'/exp OR 'ventriculoperitoneal shunt':ti,ab OR 'ventriculo peritoneal shunt':ti,ab OR 'ventriculoperitoneal shunts':ti,ab OR 'ventriculo peritoneal shunts':ti,ab OR 'arteriovenous malformation'/exp OR 'arteriovenous malformations':ti,ab OR 'arteriovenous malformation':ti,ab OR 'AVM':ti,ab OR 'Aneurysm'/exp OR 'aneurysm':ti,ab OR 'aneurysms':ti,ab OR 'brain tumor'/exp OR 'brain neoplasms':ti,ab OR 'brain neoplasm':ti,ab OR 'brain tumour':ti,ab OR 'brain tumours':ti,ab OR 'brain tumor':ti,ab OR 'brain tumors':ti,ab OR 'hepatic encephalopathy scale':ti,ab OR 'PSOM':ti,ab OR 'pediatric stroke outcome measure':ti,ab OR 'four

score':ti,ab OR 'STESS':ti,ab OR 'status epilepticus severity score':ti,ab OR 'EMSE':ti,ab OR ('epidemiology based mortality score' AND 'status epilepticus') OR 'GCS':ti,ab OR 'Glasgow coma score':ti,ab OR 'pupillary reaction':ti,ab OR 'pupil reflex'/exp OR 'pupil reflex':ti,ab OR 'delirium'/exp OR 'delirium':ti,ab OR 'CAPD':ti,ab OR ('Cornell Assessment' AND 'Pediatric Delirium') OR 'P-CAM':ti,ab OR 'pediatric confusion assessment method':ti,ab OR 'pCAM-ICU':ti,ab OR 'preschool confusion assessment method':ti,ab OR 'psCAM-ICU':ti,ab OR ('Confusion method' AND 'ICU') OR 'CAM-ICU':ti,ab OR 'EEG':ti,ab OR 'electroencephalography'/exp OR 'electroencephalography':ti,ab OR 'electroencephalogram'/exp OR 'electroencephalogram':ti,ab OR ("impairment" AND ('consciousness'/exp OR 'consciousness':ti,ab)) OR 'altered mental status' OR 'persistent vegetative state'/exp OR 'vegetative state':ti,ab OR 'coma'/de OR 'coma':ti,ab)

AND

('Child'/de OR 'Infant'/de OR 'Adolescent'/de OR 'preschool child'/exp OR 'child':ti,ab OR 'infant':ti,ab OR 'adolescent' OR 'children' OR 'infants' OR 'adolescents' OR 'pediatric patient' OR 'pediatric patients' OR 'adolescence' OR 'youth' OR 'youths' OR 'juvenile'/exp OR 'juvenile' OR 'childhood' OR 'teenager' OR 'teenagers' OR 'teen' OR 'teens' OR 'preschool child' OR 'neonate' OR 'newborn'/de OR 'newborn':ti,ab OR 'baby' OR 'babies' OR 'pediatric':ti,ab OR 'pediatrics':ti,ab OR 'paediatric':ti,ab OR 'paediatrics':ti,ab OR 'toddler'/exp OR 'toddler' OR 'toddlers')

AND

('Outcome Assessment'/exp OR 'Critical Care Outcome'/exp OR 'mortality'/exp OR 'length of stay'/exp OR 'quality of life'/exp OR 'outcome' OR 'mortality' OR 'length of stay' OR 'LOS' OR 'quality of life' OR 'PedsQL' OR 'functional morbidity' OR 'PCPC' OR 'pediatric cerebral performance category' OR 'POPC' OR 'pediatric overall performance category' OR 'FSS' OR 'functional status scale' OR 'WeeFIM' OR 'PEDI' OR ('pediatric evaluation' AND 'disability inventory') OR 'MSEL' OR 'mullen scales' OR 'WISC':ti,ab OR 'wechsler intelligence scale' OR 'BSID' OR 'bayley scales' OR 'VABS' OR 'vineland adaptive behavior scale' OR 'Depression assessment'/exp OR 'depression':ti,ab OR 'PTSD' OR 'post-traumatic stress disorder' OR 'post-traumatic stress' OR 'posttraumatic stress disorder'/exp OR 'acute stress disorder'/exp OR 'acute stress disorder' OR 'acute traumatic stress disorder' OR 'tracheostomy'/exp OR 'tracheostomy' OR 'Gastrostomy'/exp OR 'gastrostomy' OR 'stomach tube'/exp OR 'gastric tube' OR 'NPMODS' OR 'progressive multiple organ dysfunction' OR 'organ dysfunction resolution' OR 'cost of medical care' OR 'health care costs'/exp OR 'symptom improvement' OR 'duration of life' OR 'quality of dying' OR 'quality of death' OR 'Quality adjusted life year'/exp OR 'neurocognitive' OR 'neuro-cognitive' OR 'neuro cognitive' OR 'neurocognition' OR 'neurodevelopmental' OR 'neuro-developmental' OR 'neuro developmental' OR 'neurodevelopment' OR 'neuro-development' OR 'neuro development' OR 'neurologic' OR 'neurological' OR 'cognitive' OR 'HRQOL' OR 'functional outcome' OR 'functional outcomes' OR 'pediatric stroke outcome measures' OR 'Glasgow Outcome Score' OR 'GOS' OR 'extracorporeal life support' OR ('waiting lists' AND 'heart transplantation'/exp) OR 'extracorporeal oxygenation'/exp OR 'extracorporeal membrane oxygenation' OR 'ECMO' OR 'mechanical circulatory support' OR 'left ventricular assist device' OR 'LVAD' OR 'ventilator free' OR 'VFD' OR 'inotrope dependency' OR 'mechanical support' OR 'seizure'/exp OR 'seizure' OR 'seizures' OR 'pedNiHSS' OR 'pediatric NIH Stroke Scale' OR 'neurologic disability' OR 'neurological disability')

AND

('predictive value'/exp OR 'sensitivity and specificity'/exp OR 'False Negative result'/exp OR 'False Positive result'/exp OR 'specificity' OR 'false negative' OR 'false positive' OR 'predict' OR 'predicting' OR 'predictive' OR 'prediction' OR 'predictor' OR 'accurate' OR 'accuracy' OR 'precision' OR 'precise' OR 'validity' OR 'reliability' OR 'discrimination' OR 'calibration' OR 'sensitivity to change' OR 'goodness of fit')

NOT ('editorial'/it OR 'letter'/it OR 'note'/it OR 'review'/it OR 'chapter'/it OR 'conference abstract'/it)

Searched 11/21/2017, 10598 results

Searched 1/9/2020, 2847 results

### Respiratory dysfunction

11/22/2017 search

Total results: 5704

Duplicate results: 1526

Results imported to Covidence: 4178

1/7/2020 update (2017-2020)

Total results: 1481

Duplicate results: 377

Results imported to Covidence: 1104

|                                                                     |                                                                     |
|---------------------------------------------------------------------|---------------------------------------------------------------------|
| Covidence dedupes: 13<br>Results for title/abstract screening: 4165 | Covidence dedupes: 277<br>Results for title/abstract screening: 827 |
|---------------------------------------------------------------------|---------------------------------------------------------------------|

**Pubmed:**

("ARDS"[tiab] OR "respiratory distress syndrome, adult"[mesh] OR "Respiratory Distress Syndrome, Newborn"[Mesh] OR "respiratory distress syndrome"[tiab] OR "shock lung"[tiab] OR "acute lung injury"[mesh] OR "acute lung injury"[tiab] OR "acute lung injuries"[tiab] OR "acute hypoxemic respiratory failure"[tiab] OR "AHRF"[tiab] OR "idiopathic respiratory distress syndrome"[tiab] OR "Respiratory Insufficiency"[mesh:noexp] OR "respiratory insufficiency"[tiab] OR "respiratory failure"tiab] OR "lung failure"[tiab] OR "pulmonary failure"[tiab] OR "respiratory dysfunction"[tiab] OR "Acidosis, Respiratory"[mh] OR "respiratory acidosis"[tiab] OR "Positive-Pressure Respiration, Intrinsic"[mh] OR "intrinsic positive end-expiratory pressure"[tiab] OR "auto-PEEP"[tiab] OR "auto-positive end-expiratory pressure"[tiab] OR "bronchiolitis"[tiab] OR "pneumonia"[tiab] OR "chronic lung disease"[tiab] OR "mechanical ventilation"[tiab] OR "non-invasive ventilation"[tiab] OR "nasal CPAP"[tiab] OR "high flow nasal cannula"[tiab] OR "PaO2/FiO2" OR "P/F" OR "SaO2/FiO2" OR "SpO2/FiO2" OR "oxygenation index" OR "oxygen saturation index" OR "respiratory rate" OR "blood ph" OR "partial pressure of arterial oxygen" OR "PaO2" OR "partial pressure of carbon dioxide"[tiab] OR "PCO2" OR "dead space fraction" OR "brain natriuretic protein"[tiab] OR "BNP"[tiab] OR "vWF"[tiab] OR "von Willebrand factor"[mh] OR "von Willebrand factor"[tiab] OR "secretory intercellular adhesion molecule-1"[tiab] OR "ICAM-1"[tiab] OR "Endothelin-1"[mh] OR "endothelin-1"[tiab] OR "plasminogen activator inhibitor-1"[mh] OR "plasminogen activator inhibitor-1"[tiab] OR "PAI-1"[tiab])

AND

("Child"[mh] OR "Infant"[mh:noexp] OR "Infant, Newborn"[mh:noexp] OR "infant, low birth weight"[mh] OR "infant, postmature"[mh] OR "Adolescent"[mh] OR "Child, Preschool"[mh] OR "child"[tiab] OR "infant"[all] OR "adolescent"[all] OR "children"[all] OR "infants"[all] OR "adolescents"[all] OR "pediatric patient"[all] OR "pediatric patients"[all] OR "adolescence"[all] OR "youth"[all] OR "youths"[all] OR "juvenile"[all] OR "childhood"[all] OR "teenager"[all] OR "teenagers"[all] OR "teen"[all] OR "teens"[all] OR "preschool child"[all] OR "neonate"[all] OR "newborn"[all] OR "baby"[all] OR "babies"[all] OR "pediatric"[tiab] OR "pediatrics"[tiab] OR "paediatric"[tiab] OR "paediatrics"[tiab] OR "toddler"[all] OR "toddlers"[all])

AND

("Patient Outcome Assessment"[mh] OR "Critical Care Outcomes"[mh] OR "mortality"[mh] OR "length of stay"[mh] OR "quality of life"[mh] OR "outcome"[tw] OR "mortality"[tw] OR "length of stay"[tw] OR "LOS"[tw] OR "quality of life"[tw] OR "PedsQL"[tw] OR "functional morbidity"[tw] OR "PCPC"[tw] OR "pediatric cerebral performance category"[tw] OR "POPC"[tw] OR "pediatric overall performance category"[tw] OR "FSS"[tw] OR "functional status scale"[tw] OR "WeeFIM"[tw] OR "PEDI"[tw] OR ("pediatric evaluation" AND "disability inventory") OR "MSEL"[tw] OR "mullen scales"[tw] OR "WISC"[tiab] OR "wechsler intelligence scale"[tw] OR "BSID"[tw] OR "bayley scales"[tw] OR "VABS"[tw] OR "vineland adaptive behavior scale"[tw] OR "Depression/diagnosis"[mh] OR "depression"[tiab] OR "PTSD"[tw] OR "post-traumatic stress disorder"[tw] OR "post-traumatic stress"[tw] OR "Stress Disorders, Post-Traumatic"[mh] OR "Stress Disorders, Traumatic, Acute"[mh] OR "acute stress disorder"[tw] OR "acute traumatic stress disorder"[tw] OR "tracheostomy"[mh] OR "tracheostomy"[tw] OR "Gastrostomy"[mh] OR "gastrostomy"[tw] OR "gastric tube"[tw] OR "NPMODS"[tw] OR "progressive multiple organ dysfunction"[tw] OR "organ dysfunction resolution"[tw] OR "cost of medical care"[tw] OR "health care costs"[mh] OR "symptom improvement"[tw] OR "duration of life"[tw] OR "quality of dying"[tw] OR "quality of death"[tw] OR "Quality-adjusted life years"[mh] OR "neurocognitive"[tw] OR "neuro-cognitive"[tw] OR "neuro cognitive"[tw] OR "neurocognition"[tw] OR "neurodevelopmental"[tw] OR "neuro-developmental"[tw] OR "neuro developmental"[tw] OR "neurodevelopment"[tw] OR "neuro-development"[tw] OR "neuro development"[tw] OR "neurologic"[tw] OR "neurological"[tw] OR "cognitive"[tw] OR "HRQOL"[tw] OR "functional outcome"[tw] OR "functional outcomes"[tw] OR "pediatric stroke outcome measures"[tw] OR "Glasgow Outcome Score"[tw] OR "GOS"[tw] OR "extracorporeal life support"[tw] OR ("waiting lists"[mh] AND "heart transplantation"[mh]) OR "extracorporeal membrane oxygenation"[mh] OR "extracorporeal membrane oxygenation"[tw] OR "ECMO"[tw] OR "mechanical circulatory support"[tw] OR "left ventricular assist device"[tw] OR "LVAD"[tw] OR "ventilator free"[tw] OR "VFD"[tw] OR "inotrope dependency"[tw] OR "mechanical support"[tw] OR "seizures"[mh] OR "seizure"[tw] OR "seizures"[tw] OR "pedNiHSS"[tw] OR "pediatric NIH Stroke Scale"[tw] OR "neurologic disability"[tw] OR "neurological disability"[tw])

AND

("predictive value of tests"[mh] OR "sensitivity and specificity"[mh] OR "False Negative Reactions"[mh] OR "False Positive Reactions"[mh] OR "specificity" OR "false negative" OR "false positive" OR "predict" OR "predicting" OR "predictive" OR "prediction" OR "predictor" OR "accurate" OR "accuracy" OR "precision" OR "precise" OR "validity" OR "reliability" OR "discrimination" OR "calibration" OR "sensitivity to change" OR "goodness of fit")

NOT ("editorial"[pt] OR "guideline"[pt] OR "letter"[pt] OR "review"[pt] OR "meta-analysis"[pt])

Searched 11/22/2017, 2450 results

Searched 1/7/2020, 571 results

**Embase:**

('ards':ti,ab OR 'adult respiratory distress syndrome'/exp OR 'neonatal respiratory distress syndrome'/exp OR 'respiratory distress syndrome':ti,ab OR 'shock lung':ti,ab OR 'acute lung injury'/exp OR 'acute lung injury':ti,ab OR 'acute lung injuries':ti,ab OR 'acute hypoxemic respiratory failure':ti,ab OR 'ahrf':ti,ab OR 'idiopathic respiratory distress syndrome':ti,ab OR 'respiratory insufficiency'/de OR 'respiratory insufficiency':ti,ab OR 'respiratory failure':ti,ab OR 'lung failure':ti,ab OR 'pulmonary failure':ti,ab OR 'respiratory dysfunction':ti,ab OR 'respiratory acidosis'/exp OR 'respiratory acidosis':ti,ab OR 'positive end expiratory pressure'/exp OR 'intrinsic positive end-expiratory pressure':ti,ab OR 'auto-peep':ti,ab OR 'auto-positive end-expiratory pressure':ti,ab OR 'bronchiolitis':ti,ab OR 'pneumonia':ti,ab OR 'chronic lung disease':ti,ab OR 'mechanical ventilation':ti,ab OR 'non-invasive ventilation':ti,ab OR 'nasal cpap':ti,ab OR 'high flow nasal cannula':ti,ab OR 'pao2/fio2':ti,ab OR 'p/f':ti,ab OR 'sao2/fio2':ti,ab OR 'spo2/fio2':ti,ab OR 'oxygenation index':ti,ab OR 'oxygen saturation index':ti,ab OR 'respiratory rate':ti,ab OR 'blood ph':ti,ab OR 'partial pressure of arterial oxygen':ti,ab OR 'pao2':ti,ab OR 'partial pressure of carbon dioxide':ti,ab OR 'pco2':ti,ab OR 'dead space fraction':ti,ab OR 'brain natriuretic protein':ti,ab OR 'bnp':ti,ab OR 'vwf':ti,ab OR 'von willebrand factor'/exp OR 'von willebrand factor':ti,ab OR 'secretory intercellular adhesion molecule-1':ti,ab OR 'icam-1':ti,ab OR 'endothelin 1'/exp OR 'endothelin-1':ti,ab OR 'plasminogen activator inhibitor 1'/exp OR 'plasminogen activator inhibitor-1':ti,ab OR 'pai-1':ti,ab)

AND

('Child'/de OR 'Infant'/de OR 'Adolescent'/de OR 'preschool child'/exp OR 'child':ti,ab OR 'infant':ti,ab OR 'adolescent' OR 'children' OR 'infants' OR 'adolescents' OR 'pediatric patient' OR 'pediatric patients' OR 'adolescence' OR 'youth' OR 'youths' OR 'juvenile'/exp OR 'juvenile' OR 'childhood' OR 'teenager' OR 'teenagers' OR 'teen' OR 'teens' OR 'preschool child' OR 'neonate' OR 'newborn'/de OR 'newborn':ti,ab OR 'baby' OR 'babies' OR 'pediatric':ti,ab OR 'pediatrics':ti,ab OR 'paediatric':ti,ab OR 'paediatrics':ti,ab OR 'toddler'/exp OR 'toddler' OR 'toddlers')

AND

('Outcome Assessment'/exp OR 'Critical Care Outcome'/exp OR 'mortality'/exp OR 'length of stay'/exp OR 'quality of life'/exp OR 'outcome' OR 'mortality' OR 'length of stay' OR 'LOS' OR 'quality of life' OR 'PedsQL' OR 'functional morbidity' OR 'PCPC' OR 'pediatric cerebral performance category' OR 'POPC' OR 'pediatric overall performance category' OR 'FSS' OR 'functional status scale' OR 'WeeFIM' OR 'PEDI' OR ('pediatric evaluation' AND 'disability inventory') OR 'MSEL' OR 'mullen scales' OR 'WISC':ti,ab OR 'wechsler intelligence scale' OR 'BSID' OR 'bayley scales' OR 'VABS' OR 'vineland adaptive behavior scale' OR 'Depression assessment'/exp OR 'depression':ti,ab OR 'PTSD' OR 'post-traumatic stress disorder' OR 'post-traumatic stress' OR 'posttraumatic stress disorder'/exp OR 'acute stress disorder'/exp OR 'acute stress disorder' OR 'acute traumatic stress disorder' OR 'tracheostomy'/exp OR 'tracheostomy' OR 'Gastrostomy'/exp OR 'gastrostomy' OR 'stomach tube'/exp OR 'gastric tube' OR 'NPMODS' OR 'progressive multiple organ dysfunction' OR 'organ dysfunction resolution' OR 'cost of medical care' OR 'health care costs'/exp OR 'symptom improvement' OR 'duration of life' OR 'quality of dying' OR 'quality of death' OR 'Quality adjusted life year'/exp OR 'neurocognitive' OR 'neuro-cognitive' OR 'neuro cognitive' OR 'neurocognition' OR 'neurodevelopmental' OR 'neuro-developmental' OR 'neuro developmental' OR 'neurodevelopment' OR 'neuro-development' OR 'neuro development' OR 'neurologic' OR 'neurological' OR 'cognitive' OR 'HRQOL' OR 'functional outcome' OR 'functional outcomes' OR 'pediatric stroke outcome measures' OR 'Glasgow Outcome Score' OR 'GOS' OR 'extracorporeal life support' OR ('waiting lists' AND 'heart transplantation'/exp) OR 'extracorporeal oxygenation'/exp OR 'extracorporeal membrane oxygenation' OR 'ECMO' OR 'mechanical circulatory support' OR 'left ventricular assist device' OR 'LVAD' OR 'ventilator



free' OR 'VFD' OR 'inotrope dependency' OR 'mechanical support' OR 'seizure'/exp OR 'seizure' OR 'seizures' OR 'pedNIHSS' OR 'pediatric NIH Stroke Scale' OR 'neurologic disability' OR 'neurological disability')

AND

('predictive value'/exp OR 'sensitivity and specificity'/exp OR 'False Negative result'/exp OR 'False Positive result'/exp OR 'specificity' OR 'false negative' OR 'false positive' OR 'predict' OR 'predicting' OR 'predictive' OR 'prediction' OR 'predictor' OR 'accurate' OR 'accuracy' OR 'precision' OR 'precise' OR 'validity' OR 'reliability' OR 'discrimination' OR 'calibration' OR 'sensitivity to change' OR 'goodness of fit')

NOT ('editorial'/it OR 'letter'/it OR 'note'/it OR 'review'/it OR 'chapter'/it OR 'conference abstract'/it)

Searched 11/22/2017, 3254 results

Searched 1/7/2020, 910 results

### Cardiovascular dysfunction

12/22/2017 search

Total results: 7552

Duplicate results: 2052

Unique results for import to Covidence: 5500

Covidence duplicates: 18

Total for title/abstract screening: 5482

1/6/2020 update (2017-2020)

Total results: 2268

Duplicate results: 593

Unique results for import to Covidence: 1675

Covidence duplicates: 420

Total for title/abstract screening: 1255

#### Pubmed:

("heart failure"[mh] OR "heart failure"[tiab] OR "cardiac failure"[tiab] OR "cardiovascular dysfunction"[tiab] OR "myocardial dysfunction"[tiab] OR "shock, cardiogenic"[mh] OR "cardiogenic shock"[tiab] OR "cardiac surgical procedures"[mh] OR "cardiac surgical procedures"[tiab] OR "cardiac surgery"[tiab] OR "cardiac surgeries"[tiab] OR "Heart surgery"[tiab] OR "heart surgeries"[tiab] OR "myocarditis"[mh] OR "myocarditis"[tiab] OR "arteriovenous oxygen difference"[tiab] OR "AV-O2"[tiab] OR "A-V difference"[tiab] OR "lactate"[tiab] OR "lactic acid"[tiab] OR "lactatemia"[tiab] OR "metabolic acidosis"[tiab] OR "SvO2"[tiab] OR "SV-O2"[tiab] OR "mixed venous oxygen saturation"[tiab] OR "mixed venous saturation"[tiab] OR "heart rate"[mh] OR "heart rate"[tiab] OR "blood pressure"[mh] OR "blood pressure"[tiab] OR "systolic"[tiab] OR "diastolic"[tiab] OR "vasoactive-inotropic score"[tiab] OR "troponin"[mh] OR "troponin"[tiab] OR "troponins"[tiab] OR "brain natriuretic peptide"[tiab] OR "BNP"[tiab] OR "spectroscopy, near-infrared"[mh] OR "near infrared spectroscopy"[tiab] OR "NIRS"[tiab] OR "congenital heart disease"[tiab] OR "congenital heart diseases"[tiab] OR "congenital heart failure"[tiab] OR "heart defects, congenital"[MeSH Terms] OR "congenital heart defects"[tiab] OR "congenital heart defect"[tiab] OR "CHD"[tiab] OR "heart abnormalities"[tiab] OR "heart abnormality"[tiab] OR "acquired heart disease"[tiab] OR "cardiac disease"[tiab] OR "cardiac defect"[tiab] OR "heart defect"[tiab] OR "heart disease"[tiab] OR "heart failure"[tiab] OR "cardiac failure"[tiab] OR "congestive heart failure"[tiab] OR "cardiogenic shock"[tiab] OR "myocarditis"[tiab] OR "single-ventricle physiology"[tiab] OR "ventricular septal defect"[tiab] OR "pulmonary hypertension"[tiab] OR "cardiogenic shock"[tiab] OR "cardiopulmonary bypass"[tiab] OR "CPB"[tiab] OR "coronary artery bypass graft"[tiab] OR "CABG"[tiab] OR "cardiac surgery"[tiab] OR "cardiac surgeries"[tiab] OR "heart surgery"[tiab] OR "heart surgeries"[tiab] OR "congenital heart surgery"[tiab] OR "congenital heart surgeries"[tiab] OR ("heart"[tiab] OR "cardiac"[tiab]) AND ("ultrasound"[tiab] OR "ultrasonography"[mh])) OR "fractional shortening"[tiab] OR ("global assessment"[tiab] AND "cardiac function"[tiab]) OR "ejection fraction"[tiab] OR "cerebral oximetry"[tiab] OR "rSO2"[tiab] OR "regional oxygen saturation"[tiab] OR "somatic oximetry"[tiab] OR "inotropic score"[tiab] OR "VIS"[tiab] OR "plasma biomarker"[tiab] OR "plasma biomarkers"[tiab])

AND

("Child"[mh] OR "Infant"[mh:noexp] OR "Infant, Newborn"[mh:noexp] OR "infant, low birth weight"[mh] OR "infant, postmature"[mh] OR "Adolescent"[mh] OR "Child, Preschool"[mh] OR "child"[tiab] OR "infant"[all] OR "adolescent"[all] OR "children"[all] OR "infants"[all] OR "adolescents"[all] OR "pediatric patient"[all] OR "pediatric patients"[all] OR "adolescence"[all] OR "youth"[all] OR "youths"[all] OR "juvenile"[all] OR "childhood"[all] OR "teenager"[all] OR "teenagers"[all] OR "teen"[all] OR "teens"[all] OR "preschool child"[all] OR "neonate"[all] OR "newborn"[all] OR "baby"[all] OR "babies"[all] OR "pediatric"[tiab] OR "pediatrics"[tiab] OR "paediatric"[tiab] OR "paediatrics"[tiab] OR "toddler"[all] OR "toddlers"[all])

AND

("Patient Outcome Assessment"[mh] OR "Critical Care Outcomes"[mh] OR "mortality"[mh] OR "length of stay"[mh] OR "quality of life"[mh] OR "outcome"[tw] OR "mortality"[tw] OR "length of stay"[tw] OR "LOS"[tw] OR "quality of life"[tw] OR "PedsQL"[tw] OR "functional morbidity"[tw] OR "PCPC"[tw] OR "pediatric cerebral performance category"[tw] OR "POPC"[tw] OR "pediatric overall performance category"[tw] OR "FSS"[tw] OR "functional status scale"[tw] OR "WeeFIM"[tw] OR "PEDI"[tw] OR ("pediatric evaluation" AND "disability inventory") OR "MSEL"[tw] OR "mullen scales"[tw] OR "WISC"[tiab] OR "wechsler intelligence scale"[tw] OR "BSID"[tw] OR "bayley scales"[tw] OR "VABS"[tw] OR "vineland adaptive behavior scale"[tw] OR "Depression/diagnosis"[mh] OR "depression"[tiab] OR "PTSD"[tw] OR "post-traumatic stress disorder"[tw] OR "post-traumatic stress"[tw] OR "Stress Disorders, Post-Traumatic"[mh] OR "Stress Disorders, Traumatic, Acute"[mh] OR "acute stress disorder"[tw] OR "acute traumatic stress disorder"[tw] OR "ABAS"[tiab] OR "adaptive behavior assessment system"[tiab] OR "tracheostomy"[mh] OR "tracheostomy"[tw] OR "Gastrostomy"[mh] OR "gastrostomy"[tw] OR "gastric tube"[tw] OR "NPMODS"[tw] OR "progressive multiple organ dysfunction"[tw] OR "organ dysfunction resolution"[tw] OR "cost of medical care"[tw] OR "health care costs"[mh] OR "symptom improvement"[tw] OR "duration of life"[tw] OR "quality of dying"[tw] OR "quality of death"[tw] OR "Quality-adjusted life years"[mh] OR "neurocognitive"[tw] OR "neuro-cognitive"[tw] OR "neuro cognitive"[tw] OR "neurocognition"[tw] OR "neurodevelopmental"[tw] OR "neuro-developmental"[tw] OR "neuro developmental"[tw] OR "neurodevelopment"[tw] OR "neuro-development"[tw] OR "neuro development"[tw] OR "neurologic"[tw] OR "neurological"[tw] OR "cognitive"[tw] OR "HRQOL"[tw] OR "functional outcome"[tw] OR "functional outcomes"[tw] OR "pediatric stroke outcome measures"[tw] OR "Glasgow Outcome Score"[tw] OR "GOS"[tw] OR "extracorporeal life support"[tw] OR ("waiting lists"[mh] AND "heart transplantation"[mh]) OR "extracorporeal membrane oxygenation"[mh] OR "extracorporeal membrane oxygenation"[tw] OR "ECMO"[tw] OR "mechanical circulatory support"[tw] OR "left ventricular assist device"[tw] OR "LVAD"[tw] OR "ventilator free"[tw] OR "VFD"[tw] OR "inotrope dependency"[tw] OR "mechanical support"[tw] OR "seizures"[mh] OR "seizure"[tw] OR "seizures"[tw] OR "pedNIHSS"[tw] OR "pediatric NIH Stroke Scale"[tw] OR "neurologic disability"[tw] OR "neurological disability"[tw]) AND ("predictive value of tests"[mh] OR "sensitivity and specificity"[mh] OR "False Negative Reactions"[mh] OR "False Positive Reactions"[mh] OR "specificity" OR "false negative" OR "false positive" OR "predict" OR "predicting" OR "predictive" OR "prediction" OR "predictor" OR "accurate" OR "accuracy" OR "precision" OR "precise" OR "validity" OR "reliability" OR "discrimination" OR "calibration" OR "sensitivity to change" OR "goodness of fit") NOT ("editorial"[pt] OR "guideline"[pt] OR "letter"[pt] OR "review"[pt] OR "meta-analysis"[pt]) NOT "adult"[mh] NOT ("animals"[mesh] NOT ("animals"[mesh] AND "humans"[mesh])) Searched 12/22/2017, 3513 results Searched 1/6/2020, 979 results

**Embase:**

('heart failure'/exp OR 'heart failure':ti,ab OR 'cardiac failure':ti,ab OR 'cardiovascular dysfunction':ti,ab OR 'myocardial dysfunction':ti,ab OR 'cardiogenic shock'/exp OR 'cardiogenic shock':ti,ab OR 'heart surgery'/exp OR 'cardiac surgical procedures':ti,ab OR 'cardiac surgery':ti,ab OR 'cardiac surgeries':ti,ab OR 'Heart surgery':ti,ab OR 'heart surgeries':ti,ab OR 'myocarditis'/exp OR 'myocarditis':ti,ab OR 'arteriovenous oxygen difference':ti,ab OR 'AV-O2':ti,ab OR 'A-V difference':ti,ab OR 'lactate':ti,ab OR 'lactic acid':ti,ab OR 'lactatemia':ti,ab OR 'metabolic acidosis':ti,ab OR 'SvO2':ti,ab OR 'SV-O2':ti,ab OR 'mixed venous oxygen saturation':ti,ab OR 'mixed venous saturation':ti,ab OR 'heart rate'/exp OR 'heart rate':ti,ab OR 'blood pressure'/exp OR 'blood pressure':ti,ab OR 'systolic':ti,ab OR 'diastolic':ti,ab OR 'vasoactive-inotropic score':ti,ab OR 'troponin'/exp OR 'troponin':ti,ab OR 'troponins':ti,ab OR 'brain natriuretic peptide':ti,ab OR 'BNP':ti,ab OR 'near infrared spectroscopy'/exp OR 'near infrared spectroscopy':ti,ab OR 'NIRS':ti,ab OR 'ABAS':ti,ab OR 'adaptive behavior assessment system':ti,ab OR 'congenital heart disease':ti,ab OR 'congenital heart diseases':ti,ab OR 'congenital heart failure':ti,ab OR 'congenital heart malformation'/exp OR 'congenital heart defects':ti,ab OR 'congenital heart defect':ti,ab OR 'CHD':ti,ab OR 'heart abnormalities':ti,ab OR 'heart abnormality':ti,ab OR 'acquired heart disease':ti,ab OR 'cardiac disease':ti,ab OR 'cardiac defect':ti,ab OR 'heart defect':ti,ab OR 'heart disease':ti,ab OR 'heart failure':ti,ab OR 'cardiac failure':ti,ab OR 'congestive heart failure':ti,ab OR 'single-ventricle physiology':ti,ab OR 'ventricular septal defect':ti,ab OR

'pulmonary hypertension':ti,ab OR 'cardiopulmonary bypass'/exp OR 'cardiopulmonary bypass':ti,ab OR 'CPB':ti,ab OR 'coronary artery bypass graft':ti,ab OR 'CABG':ti,ab OR (('heart':ti,ab OR 'cardiac':ti,ab) AND ('ultrasound':ti,ab OR 'echography'/exp)) OR 'fractional shortening':ti,ab OR ('global assessment':ti,ab AND 'cardiac function':ti,ab) OR 'heart ejection fraction'/exp OR 'ejection fraction':ti,ab OR 'cerebral oximetry':ti,ab OR 'rSVO2':ti,ab OR 'regional oxygen saturation':ti,ab OR 'somatic oximetry':ti,ab OR 'inotropic score':ti,ab OR 'VIS':ti,ab OR 'plasma biomarker':ti,ab OR 'plasma biomarkers':ti,ab)

AND

('Child'/de OR 'Infant'/de OR 'Adolescent'/de OR 'preschool child'/exp OR 'child':ti,ab OR 'infant':ti,ab OR 'adolescent' OR 'children' OR 'infants' OR 'adolescents' OR 'pediatric patient' OR 'pediatric patients' OR 'adolescence' OR 'youth' OR 'youths' OR 'juvenile'/exp OR 'juvenile' OR 'childhood' OR 'teenager' OR 'teenagers' OR 'teen' OR 'teens' OR 'preschool child' OR 'neonate' OR 'newborn'/de OR 'newborn':ti,ab OR 'baby' OR 'babies' OR 'pediatric':ti,ab OR 'pediatrics':ti,ab OR 'paediatric':ti,ab OR 'paediatrics':ti,ab OR 'toddler'/exp OR 'toddler' OR 'toddlers')

AND

('Outcome Assessment'/exp OR 'Critical Care Outcome'/exp OR 'mortality'/exp OR 'length of stay'/exp OR 'quality of life'/exp OR 'outcome' OR 'mortality' OR 'length of stay' OR 'LOS' OR 'quality of life' OR 'PedsQL' OR 'functional morbidity' OR 'PCPC' OR 'pediatric cerebral performance category' OR 'POPC' OR 'pediatric overall performance category' OR 'FSS' OR 'functional status scale' OR 'WeeFIM' OR 'PEDI' OR ('pediatric evaluation' AND 'disability inventory') OR 'MSEL' OR 'mullen scales' OR 'WISC':ti,ab OR 'wechsler intelligence scale' OR 'BSID' OR 'bayley scales' OR 'VABS' OR 'vineland adaptive behavior scale' OR 'Depression assessment'/exp OR 'depression':ti,ab OR 'PTSD' OR 'post-traumatic stress disorder' OR 'post-traumatic stress' OR 'posttraumatic stress disorder'/exp OR 'acute stress disorder'/exp OR 'acute stress disorder' OR 'acute traumatic stress disorder' OR 'tracheostomy'/exp OR 'tracheostomy' OR 'Gastrostomy'/exp OR 'gastrostomy' OR 'stomach tube'/exp OR 'gastric tube' OR 'NPMODS' OR 'progressive multiple organ dysfunction' OR 'organ dysfunction resolution' OR 'cost of medical care' OR 'health care costs'/exp OR 'symptom improvement' OR 'duration of life' OR 'quality of dying' OR 'quality of death' OR 'Quality adjusted life year'/exp OR 'neurocognitive' OR 'neuro-cognitive' OR 'neuro cognitive' OR 'neurocognition' OR 'neurodevelopmental' OR 'neuro-developmental' OR 'neuro developmental' OR 'neurodevelopment' OR 'neuro-development' OR 'neuro development' OR 'neurologic' OR 'neurological' OR 'cognitive' OR 'HRQOL' OR 'functional outcome' OR 'functional outcomes' OR 'pediatric stroke outcome measures' OR 'Glasgow Outcome Score' OR 'GOS' OR 'extracorporeal life support' OR ('waiting lists' AND 'heart transplantation'/exp) OR 'extracorporeal oxygenation'/exp OR 'extracorporeal membrane oxygenation' OR 'ECMO' OR 'mechanical circulatory support' OR 'left ventricular assist device' OR 'LVAD' OR 'ventilator free' OR 'VFD' OR 'inotrope dependency' OR 'mechanical support' OR 'seizure'/exp OR 'seizure' OR 'seizures' OR 'pedNIHSS' OR 'pediatric NIH Stroke Scale' OR 'neurologic disability' OR 'neurological disability')

AND

('predictive value'/exp OR 'sensitivity and specificity'/exp OR 'False Negative result'/exp OR 'False Positive result'/exp OR 'specificity' OR 'false negative' OR 'false positive' OR 'predict' OR 'predicting' OR 'predictive' OR 'prediction' OR 'predictor' OR 'accurate' OR 'accuracy' OR 'precision' OR 'precise' OR 'validity' OR 'reliability' OR 'discrimination' OR 'calibration' OR 'sensitivity to change' OR 'goodness of fit')

NOT ('editorial'/it OR 'letter'/it OR 'note'/it OR 'review'/it OR 'chapter'/it OR 'conference abstract'/it)

NOT 'adult'/exp

NOT ('animal'/exp NOT ('animal'/exp AND 'human'/exp))

Searched 12/22/2017, 4039 results

Searched 1/6/2020, 1289 results

### Gastrointestinal dysfunction

12/7/2017 search

Total results:

Duplicate results:

Unique results: 1362

Deduped on Covidence import: 2

1/8/2020 update (2017-2020)

Total results: 557

Duplicate results: 97

Unique results: 460

Deduped on Covidence import: 107

**Pubmed:**

("feeding intolerance"[tiab] OR "intestinal failure"[tiab] OR "vomiting"[mh] OR "vomiting"[tiab] OR "vomit"[tiab] OR "emesis"[tiab] OR "hematemesis"[mh] OR "hematemesis" OR "gastroesophageal reflux"[mh] OR "reflux"[tiab] OR "nasogastric output"[tiab] OR "gastrointestinal bleeding"[tiab] OR "gastrointestinal hemorrhage"[mh] OR "gastrointestinal hemorrhage"[tiab] OR "GI bleeding"[tiab] OR "GI hemorrhage"[tiab] OR "melena"[mh] OR "melena"[tiab] OR "gastritis"[mh] OR "gastritis"[tiab] OR "gastric dysmotility"[tiab] OR "Esophageal motility disorders"[mh] OR "diarrhea"[mh:noexp] OR "diarrhea"[tiab] OR "constipation"[mh] OR "constipation"[tiab] OR "gastric residual volume"[tiab] OR "fatty acid binding proteins"[mh] OR "fatty acid binding proteins"[tiab] OR "fatty acid binding protein"[tiab] OR "citrulline"[mh] OR "citrulline"[tiab] OR "claudin-3"[mh] OR "claudin-3"[tiab] ((("malnutrition"[mh] OR "malnutrition"[tiab] OR "severe acute malnutrition"[mh] OR "wasting syndrome"[mh] OR "wasting syndrome"[tiab] OR "hypermetabolism"[tiab] OR "hypermetabolic"[tiab] OR "catabolic"[tiab]) AND ("phosphorus metabolism disorders"[mh] OR "phosphorus"[tiab] OR "prealbumin"[mh] OR "prealbumin"[tiab] OR "proalbumin"[tiab] OR "transthyretin"[tiab] OR "fibrinogen"[mh] OR "fibrinogen"[tiab] OR "triglycerides"[mh] OR "triglycerides"[tiab] OR "Lipoproteins, LDL"[mh] OR "low density lipoprotein"[tiab] OR "low density lipoproteins"[tiab] OR "LDL"[tiab] OR "neopterin"[mh] OR "neopterin"[tiab] OR "C-Reactive Protein"[mh] OR "C-reactive protein"[tiab] OR "CRP"[tiab] OR "interleukin-6"[mh] OR "interleukin-6"[tiab] OR "IL-6"[tiab] OR "25-Hydroxyvitamin D 2"[mh] OR "25-hydroxyvitamin D"[tiab])) OR "Gastrointestinal microbiome"[mh] OR "gut microbial metabolites"[tiab] OR "host-microbiome"[tiab] OR "phosphate depletion"[tiab] OR "microbiome diversity"[tiab] OR "microbial diversity"[tiab] OR "loss of diversity"[tiab] OR "dysbiosis"[mh] OR "dysbiosis"[tiab] OR "proteobacteria"[mh] OR "proteobacteria"[tiab] OR "metagenomics"[mh] OR "metagenomics"[tiab] OR "metabolomics"[mh] OR "metabolomics"[tiab] OR "metabolomic"[tiab] OR "bladder pressure"[tiab] OR "intra-abdominal hypertension"[tiab] OR "intra-abdominal pressure"[tiab] OR "intraabdominal pressure"[tiab] OR "abdominal compartment syndrome"[tiab] OR (("flank"[tiab] OR "somatic"[tiab]) AND ("near-infrared spectroscopy"[tiab] OR "spectroscopy, Near-infrared"[mh] OR "NIRS"[tiab])))

AND

("Child"[mh] OR "Infant"[mh:noexp] OR "Infant, Newborn"[mh:noexp] OR "infant, low birth weight"[mh] OR "infant, postmature"[mh] OR "Adolescent"[mh] OR "Child, Preschool"[mh] OR "child"[tiab] OR "infant"[all] OR "adolescent"[all] OR "children"[all] OR "infants"[all] OR "adolescents"[all] OR "pediatric patient"[all] OR "pediatric patients"[all] OR "adolescence"[all] OR "youth"[all] OR "youths"[all] OR "juvenile"[all] OR "childhood"[all] OR "teenager"[all] OR "teenagers"[all] OR "teen"[all] OR "teens"[all] OR "preschool child"[all] OR "neonate"[all] OR "newborn"[all] OR "baby"[all] OR "babies"[all] OR "pediatric"[tiab] OR "pediatrics"[tiab] OR "paediatric"[tiab] OR "paediatrics"[tiab] OR "toddler"[all] OR "toddlers"[all])

AND

("Patient Outcome Assessment"[mh] OR "Critical Care Outcomes"[mh] OR "mortality"[mh] OR "length of stay"[mh] OR "quality of life"[mh] OR "outcome"[tw] OR "mortality"[tw] OR "length of stay"[tw] OR "LOS"[tw] OR "quality of life"[tw] OR "PedsQL"[tw] OR "functional morbidity"[tw] OR "PCPC"[tw] OR "pediatric cerebral performance category"[tw] OR "POPC"[tw] OR "pediatric overall performance category"[tw] OR "FSS"[tw] OR "functional status scale"[tw] OR "WeeFIM"[tw] OR "PEDI"[tw] OR ("pediatric evaluation" AND "disability inventory") OR "MSEL"[tw] OR "mullen scales"[tw] OR "WISC"[tiab] OR "wechsler intelligence scale"[tw] OR "BSID"[tw] OR "bayley scales"[tw] OR "VABS"[tw] OR "vineland adaptive behavior scale"[tw] OR "Depression/diagnosis"[mh] OR "depression"[tiab] OR "PTSD"[tw] OR "post-traumatic stress disorder"[tw] OR "post-traumatic stress"[tw] OR "Stress Disorders, Post-Traumatic"[mh] OR "Stress Disorders, Traumatic, Acute"[mh] OR "acute stress disorder"[tw] OR "acute traumatic stress disorder"[tw] OR "tracheostomy"[mh] OR "tracheostomy"[tw] OR "Gastrostomy"[mh] OR "gastrostomy"[tw] OR "gastric tube"[tw] OR "NPMODS"[tw] OR "progressive multiple organ dysfunction"[tw] OR "organ dysfunction resolution"[tw] OR "cost of medical care"[tw] OR "health care costs"[mh] OR "symptom improvement"[tw] OR "duration of life"[tw] OR "quality of dying"[tw] OR "quality of death"[tw] OR "Quality-adjusted life years"[mh] OR "neurocognitive"[tw] OR "neuro-cognitive"[tw] OR "neuro cognitive"[tw] OR "neurocognition"[tw] OR "neurodevelopmental"[tw] OR "neuro-developmental"[tw] OR "neuro developmental"[tw] OR "neurodevelopment"[tw] OR "neuro-development"[tw] OR "neuro development"[tw] OR "neurologic"[tw] OR "neurological"[tw] OR "cognitive"[tw] OR "HRQOL"[tw] OR "functional outcome"[tw] OR "functional outcomes"[tw] OR "pediatric stroke outcome measures"[tw] OR "Glasgow Outcome Score"[tw] OR

"GOS"[tw] OR "extracorporeal life support"[tw] OR ("waiting lists"[mh] AND "heart transplantation"[mh]) OR "extracorporeal membrane oxygenation"[mh] OR "extracorporeal membrane oxygenation"[tw] OR "ECMO"[tw] OR "mechanical circulatory support"[tw] OR "left ventricular assist device"[tw] OR "LVAD"[tw] OR "ventilator free"[tw] OR "VFD"[tw] OR "inotrope dependency"[tw] OR "mechanical support"[tw] OR "seizures"[mh] OR "seizure"[tw] OR "seizures"[tw] OR "pedNIHSS"[tw] OR "pediatric NIH Stroke Scale"[tw] OR "neurologic disability"[tw] OR "neurological disability"[tw])

AND

("predictive value of tests"[mh] OR "sensitivity and specificity"[mh] OR "False Negative Reactions"[mh] OR "False Positive Reactions"[mh] OR "specificity" OR "false negative" OR "false positive" OR "predict" OR "predicting" OR "predictive" OR "prediction" OR "predictor" OR "accurate" OR "accuracy" OR "precision" OR "precise" OR "validity" OR "reliability" OR "discrimination" OR "calibration" OR "sensitivity to change" OR "goodness of fit")

NOT ("editorial"[pt] OR "guideline"[pt] OR "letter"[pt] OR "review"[pt] OR "meta-analysis"[pt])

Searched 12/7/2017, 551 results

Searched 1/8/2020, 155 results

### Embase:

('feeding intolerance':ti,ab OR 'intestinal failure'/exp OR 'intestinal failure':ti,ab OR 'vomiting'/exp OR 'vomiting':ti,ab OR 'vomit':ti,ab OR 'emesis':ti,ab OR 'hematemesis'/exp OR 'hematemesis' OR 'gastroesophageal reflux'/exp OR 'reflux':ti,ab OR 'nasogastric output':ti,ab OR 'upper gastrointestinal bleeding'/exp OR 'gastrointestinal bleeding':ti,ab OR 'gastrointestinal hemorrhage'/exp OR 'gastrointestinal hemorrhage':ti,ab OR 'GI bleeding':ti,ab OR 'GI hemorrhage':ti,ab OR 'melena'/exp OR 'melena':ti,ab OR 'gastritis'/exp OR 'gastritis':ti,ab OR 'gastric dysmotility':ti,ab OR 'esophagus function disorder'/exp OR 'diarrhea'/de OR 'diarrhea':ti,ab OR 'constipation'/exp OR 'constipation':ti,ab OR 'gastric residual volume':ti,ab OR 'fatty acid binding protein'/exp OR 'fatty acid binding proteins':ti,ab OR 'fatty acid binding protein':ti,ab OR 'citrulline'/exp OR 'citrulline':ti,ab OR 'claudin 3'/exp OR 'claudin 3':ti,ab (( 'malnutrition'/exp OR 'malnutrition':ti,ab OR 'wasting syndrome'/exp OR 'wasting syndrome':ti,ab OR 'hypermetabolism':ti,ab OR 'hypermetabolic':ti,ab OR 'catabolic':ti,ab) AND ('disorders of mineral, electrolyte and metal metabolism'/exp OR 'phosphorus':ti,ab OR 'prealbumin'/exp OR 'prealbumin':ti,ab OR 'proalbumin':ti,ab OR 'transthyretin':ti,ab OR 'fibrinogen'/exp OR 'fibrinogen':ti,ab OR 'triacylglycerol'/exp OR 'triglycerides':ti,ab OR 'low density lipoprotein'/exp OR 'low density lipoprotein':ti,ab OR 'low density lipoproteins':ti,ab OR 'LDL':ti,ab OR 'neopterin'/exp OR 'neopterin':ti,ab OR 'C Reactive Protein'/exp OR 'C reactive protein':ti,ab OR 'CRP':ti,ab OR 'interleukin 6'/exp OR 'interleukin-6':ti,ab OR 'IL-6':ti,ab OR '25 hydroxyergocalciferol'/exp OR '25-hydroxyvitamin D':ti,ab)) OR 'intestine flora'/exp OR 'gut microbial metabolites':ti,ab OR 'host-microbiome':ti,ab OR 'phosphate depletion':ti,ab OR 'microbiome diversity':ti,ab OR 'microbial diversity':ti,ab OR 'loss of diversity':ti,ab OR 'dysbiosis'/exp OR 'dysbiosis':ti,ab OR 'proteobacteria'/exp OR 'proteobacteria':ti,ab OR 'metagenomics'/exp OR 'metagenomics':ti,ab OR 'metabolomics'/exp OR 'metabolomics':ti,ab OR 'metabolomic':ti,ab OR 'bladder pressure':ti,ab OR 'intra-abdominal hypertension':ti,ab OR 'intra-abdominal pressure':ti,ab OR 'intraabdominal pressure':ti,ab OR 'abdominal compartment syndrome':ti,ab OR (('flank':ti,ab OR 'somatic':ti,ab) AND ('near-infrared spectroscopy':ti,ab OR 'near infrared spectroscopy'/exp OR 'NIRS':ti,ab)))

AND

('Child'/de OR 'Infant'/de OR 'Adolescent'/de OR 'preschool child'/exp OR 'child':ti,ab OR 'infant':ti,ab OR 'adolescent' OR 'children' OR 'infants' OR 'adolescents' OR 'pediatric patient' OR 'pediatric patients' OR 'adolescence' OR 'youth' OR 'youths' OR 'juvenile'/exp OR 'juvenile' OR 'childhood' OR 'teenager' OR 'teenagers' OR 'teen' OR 'teens' OR 'preschool child' OR 'neonate' OR 'newborn'/de OR 'newborn':ti,ab OR 'baby' OR 'babies' OR 'pediatric':ti,ab OR 'pediatrics':ti,ab OR 'paediatric':ti,ab OR 'paediatrics':ti,ab OR 'toddler'/exp OR 'toddler' OR 'toddlers')

AND

('Outcome Assessment'/exp OR 'Critical Care Outcome'/exp OR 'mortality'/exp OR 'length of stay'/exp OR 'quality of life'/exp OR 'outcome' OR 'mortality' OR 'length of stay' OR 'LOS' OR 'quality of life' OR 'PedsQL' OR 'functional morbidity' OR 'PCPC' OR 'pediatric cerebral performance category' OR 'POPC' OR 'pediatric overall performance category' OR 'FSS' OR 'functional status scale' OR 'WeeFIM' OR 'PEDI' OR ('pediatric evaluation' AND 'disability inventory') OR 'MSEL' OR 'mullen scales' OR 'WISC':ti,ab OR 'wechsler

intelligence scale' OR 'BSID' OR 'bayley scales' OR 'VABS' OR 'vineland adaptive behavior scale' OR 'Depression assessment'/exp OR 'depression':ti,ab OR 'PTSD' OR 'post-traumatic stress disorder' OR 'post-traumatic stress' OR 'posttraumatic stress disorder'/exp OR 'acute stress disorder'/exp OR 'acute stress disorder' OR 'acute traumatic stress disorder' OR 'tracheostomy'/exp OR 'tracheostomy' OR 'Gastrostomy'/exp OR 'gastrostomy' OR 'stomach tube'/exp OR 'gastric tube' OR 'NPMODS' OR 'progressive multiple organ dysfunction' OR 'organ dysfunction resolution' OR 'cost of medical care' OR 'health care costs'/exp OR 'symptom improvement' OR 'duration of life' OR 'quality of dying' OR 'quality of death' OR 'Quality adjusted life year'/exp OR 'neurocognitive' OR 'neuro-cognitive' OR 'neuro cognitive' OR 'neurocognition' OR 'neurodevelopmental' OR 'neuro-developmental' OR 'neuro developmental' OR 'neurodevelopment' OR 'neuro-development' OR 'neuro development' OR 'neurologic' OR 'neurological' OR 'cognitive' OR 'HRQOL' OR 'functional outcome' OR 'functional outcomes' OR 'pediatric stroke outcome measures' OR 'Glasgow Outcome Score' OR 'GOS' OR 'extracorporeal life support' OR ('waiting lists' AND 'heart transplantation'/exp) OR 'extracorporeal oxygenation'/exp OR 'extracorporeal membrane oxygenation' OR 'ECMO' OR 'mechanical circulatory support' OR 'left ventricular assist device' OR 'LVAD' OR 'ventilator free' OR 'VFD' OR 'inotrope dependency' OR 'mechanical support' OR 'seizure'/exp OR 'seizure' OR 'seizures' OR 'pedNIHSS' OR 'pediatric NIH Stroke Scale' OR 'neurologic disability' OR 'neurological disability')

AND

('predictive value'/exp OR 'sensitivity and specificity'/exp OR 'False Negative result'/exp OR 'False Positive result'/exp OR 'specificity' OR 'false negative' OR 'false positive' OR 'predict' OR 'predicting' OR 'predictive' OR 'prediction' OR 'predictor' OR 'accurate' OR 'accuracy' OR 'precision' OR 'precise' OR 'validity' OR 'reliability' OR 'discrimination' OR 'calibration' OR 'sensitivity to change' OR 'goodness of fit')

NOT ('editorial'/it OR 'letter'/it OR 'note'/it OR 'review'/it OR 'chapter'/it OR 'conference abstract'/it)

Searched 12/7/2017, 1066 results

Searched 1/8/2020, 402 results

### Acute liver dysfunction

|                                                                                                                                                                                                  |                                                                                                                                                                                                            |
|--------------------------------------------------------------------------------------------------------------------------------------------------------------------------------------------------|------------------------------------------------------------------------------------------------------------------------------------------------------------------------------------------------------------|
| 11/29/2017 search<br>Total results: 8305<br>Duplicate results: 2168<br>Unique results for Covidence import: 6137<br>Duplicates found by Covidence: 24<br>Results for title/abstract review: 6113 | 1/8/2020 update (2017-2020)<br>Total results: 2472<br>Duplicate results: 601<br>Unique results for Covidence import: 1871<br>Duplicates found by Covidence: 440<br>Results for title/abstract review: 1431 |
|--------------------------------------------------------------------------------------------------------------------------------------------------------------------------------------------------|------------------------------------------------------------------------------------------------------------------------------------------------------------------------------------------------------------|

**Pubmed:**  
 ("liver failure"[mh] OR "end stage liver disease"[mh] OR "hepatic encephalopathy"[mh] OR "liver failure, acute"[mh] OR "acute-on-chronic liver failure"[mh] OR "massive hepatic necrosis"[mh] OR "hepatic dysfunction"[tw] OR "hepatic failure"[tw] OR "liver dysfunction"[tw] OR "liver failure"[tw] OR "hepatitis"[mh] OR "severe hepatitis"[tw] OR "hepatic encephalopathy"[tw] OR "hepatic coma"[tw] OR "liver transplantation"[mh] OR "liver transplant"[tw] OR "liver transplantation"[tw] OR "hepatic transplant"[tw] OR "hepatic transplantation"[tw] OR "liver graft"[tw] OR "liver grafting"[tw] OR "cardiac hepatopathy"[tw] OR "mitochondrial liver disease"[tw] OR "hepatorenal syndrome"[mh] OR "hepatorenal syndrome"[tw] OR "hypertension, Portal"[mh] OR "portal hypertension"[tw] OR "hepatopulmonary syndrome"[mh] OR "hepatopulmonary syndrome"[tw] OR "hepatopulmonary syndrome"[tw] OR "porto-pulmonary hypertension"[tw] OR "decompensated liver disease"[tw] OR "ascites"[mh] OR "ascites"[tw] OR "liver-based coagulopathy"[tw] OR "molecular absorbent recirculating system"[tw] OR "MARS"[tiab] OR "liver cell transplantation"[tw] OR "liver cell transplant"[tw] OR "Kings College Hospital Criteria"[tw] OR "Liver injury unit score"[tw] OR "LIU score"[tw] OR "acute physiology and chronic health evaluation II"[tw] OR "acute physiology and chronic health evaluation III"[tw] OR "APACHE III"[tw] OR "APACHE II"[tw] OR "precision medicine"[tw] OR "growth mixture modeling"[tw] OR "Factor V"[mh] OR "Factor V"[tw] OR "factor five"[tw] OR "AC globulin"[tw] OR "factor Pi"[tw] OR "proaccelerin"[tw] OR "factor 5"[tw] OR "Factor VII"[mh] OR "Factor VII"[tw] OR "factor seven"[tw] OR "proconvertin"[tw] OR "stable factor"[tw] OR "factor 7"[tw] OR "Factor VIII"[mh] OR "Factor VIII"[tw] OR "thromboplastinogen"[tw] OR "hyatt-c"[tw] OR "hyattc"[tw] OR "hyate c"[tw] OR "hyatec"[tw] OR "factor 8"[tw] OR "lactic acid"[mh] OR "lactic acid"[tw] OR "vitamin D-binding protein"[mh] OR "vitamin d-

binding protein"[tw] OR "vitamin d-binding globulin"[tw] OR "group-specific component globulin"[tw] OR "25-hydroxycholecalciferol-binding protein"[tw] OR "25-hydroxyvitamin d binding protein"[tw] OR "transcalciferin"[tw] OR "25-HCC-binding protein"[tw] OR "calciferol binding protein"[tw] OR "actin-free Gc-globulin"[tw] OR "Gc-globulin"[tw] OR "metabolic liver disease"[tw] OR "Liver cirrhosis"[mh] OR "cirrhosis"[tw] OR "cirrhotic"[tw] OR "jaundice"[mh] OR "jaundice"[tw] OR "cholestasis"[mh] OR "cholestasis"[tw] OR "bile duct obstruction"[tw] OR "biliary statis"[tw] OR "hyperammonemia"[mh] OR "hyperammonemia"[tw] OR "extracorporeal liver support device"[tw] OR "synthetic dysfunction"[tw] OR "chronic liver failure sequential organ failure assessment"[tw] OR "CLIF SOFA"[tw] OR "child-Turcotte Pugh"[tw] OR "MELD"[tiab] OR "APRI"[tiab] OR "liver stiffness"[tw] OR "fibroscan"[tw] OR ("blood"[tw] OR "serum"[tw]) AND ("aspartate aminotransferases"[mh] OR "aspartate aminotransaminase"[tw] OR "AST"[tiab] OR "Leucine transaminase"[mh] OR "leucine transaminase"[tw] OR "leucine amino transferase"[tw] OR "ALT"[tiab] OR "bilirubin"[mh] OR "bilirubin"[tw] OR "ammonia"[mh] OR "ammonia"[tw])) AND ("Child"[mh] OR "Infant"[mh:noexp] OR "Infant, Newborn"[mh:noexp] OR "infant, low birth weight"[mh] OR "infant, postmature"[mh] OR "Adolescent"[mh] OR "Child, Preschool"[mh] OR "child"[tiab] OR "infant"[all] OR "adolescent"[all] OR "children"[all] OR "infants"[all] OR "adolescents"[all] OR "pediatric patient"[all] OR "pediatric patients"[all] OR "adolescence"[all] OR "youth"[all] OR "youths"[all] OR "juvenile"[all] OR "childhood"[all] OR "teenager"[all] OR "teenagers"[all] OR "teen"[all] OR "teens"[all] OR "preschool child"[all] OR "neonate"[all] OR "newborn"[all] OR "baby"[all] OR "babies"[all] OR "pediatric"[tiab] OR "pediatrics"[tiab] OR "paediatric"[tiab] OR "paediatrics"[tiab] OR "toddler"[all] OR "toddlers"[all]) AND ("Patient Outcome Assessment"[mh] OR "Critical Care Outcomes"[mh] OR "mortality"[mh] OR "length of stay"[mh] OR "quality of life"[mh] OR "outcome"[tw] OR "mortality"[tw] OR "length of stay"[tw] OR "LOS"[tw] OR "quality of life"[tw] OR "PedsQL"[tw] OR "functional morbidity"[tw] OR "PCPC"[tw] OR "pediatric cerebral performance category"[tw] OR "POPC"[tw] OR "pediatric overall performance category"[tw] OR "FSS"[tw] OR "functional status scale"[tw] OR "WeeFIM"[tw] OR "PEDI"[tw] OR ("pediatric evaluation" AND "disability inventory") OR "MSEL"[tw] OR "mullen scales"[tw] OR "WISC"[tiab] OR "wechsler intelligence scale"[tw] OR "BSID"[tw] OR "bayley scales"[tw] OR "VABS"[tw] OR "vineland adaptive behavior scale"[tw] OR "Depression/diagnosis"[mh] OR "depression"[tiab] OR "PTSD"[tw] OR "post-traumatic stress disorder"[tw] OR "post-traumatic stress"[tw] OR "Stress Disorders, Post-Traumatic"[mh] OR "Stress Disorders, Traumatic, Acute"[mh] OR "acute stress disorder"[tw] OR "acute traumatic stress disorder"[tw] OR "tracheostomy"[mh] OR "tracheostomy"[tw] OR "Gastrostomy"[mh] OR "gastrostomy"[tw] OR "gastric tube"[tw] OR "NPMODS"[tw] OR "progressive multiple organ dysfunction"[tw] OR "organ dysfunction resolution"[tw] OR "cost of medical care"[tw] OR "health care costs"[mh] OR "symptom improvement"[tw] OR "duration of life"[tw] OR "quality of dying"[tw] OR "quality of death"[tw] OR "Quality-adjusted life years"[mh] OR "neurocognitive"[tw] OR "neuro-cognitive"[tw] OR "neuro cognitive"[tw] OR "neurocognition"[tw] OR "neurodevelopmental"[tw] OR "neuro-developmental"[tw] OR "neuro developmental"[tw] OR "neurodevelopment"[tw] OR "neuro-development"[tw] OR "neuro development"[tw] OR "neurologic"[tw] OR "neurological"[tw] OR "cognitive"[tw] OR "HRQOL"[tw] OR "functional outcome"[tw] OR "functional outcomes"[tw] OR "pediatric stroke outcome measures"[tw] OR "Glasgow Outcome Score"[tw] OR "GOS"[tw] OR "extracorporeal life support"[tw] OR ("waiting lists"[mh] AND "heart transplantation"[mh]) OR "extracorporeal membrane oxygenation"[mh] OR "extracorporeal membrane oxygenation"[tw] OR "ECMO"[tw] OR "mechanical circulatory support"[tw] OR "left ventricular assist device"[tw] OR "LVAD"[tw] OR "ventilator free"[tw] OR "VFD"[tw] OR "inotrope dependency"[tw] OR "mechanical support"[tw] OR "seizures"[mh] OR "seizure"[tw] OR "seizures"[tw] OR "pedNiHSS"[tw] OR "pediatric NIH Stroke Scale"[tw] OR "neurologic disability"[tw] OR "neurological disability"[tw]) AND ("predictive value of tests"[mh] OR "sensitivity and specificity"[mh] OR "False Negative Reactions"[mh] OR "False Positive Reactions"[mh] OR "specificity" OR "false negative" OR "false positive" OR "predict" OR "predicting" OR "predictive" OR "prediction" OR "predictor" OR "accurate" OR "accuracy" OR "precision" OR "precise" OR "validity" OR "reliability" OR "discrimination" OR "calibration" OR "sensitivity to change" OR "goodness of fit") NOT ("editorial"[pt] OR "guideline"[pt] OR "letter"[pt] OR "review"[pt] OR "meta-analysis"[pt]) Searched 11/29/2017, 4,000 results

Searched 1/8/2020, 996 results

**Embase:**

('liver failure'/exp OR 'end stage liver disease'/exp OR 'hepatic encephalopathy'/exp OR 'acute liver failure'/exp OR 'acute on chronic liver failure'/exp OR 'liver necrosis'/exp OR 'liver dysfunction'/exp OR 'hepatic dysfunction':ti,ab OR 'hepatic failure':ti,ab OR 'liver dysfunction':ti,ab OR 'liver failure':ti,ab OR 'hepatitis'/exp OR 'severe hepatitis':ti,ab OR 'hepatic encephalopathy':ti,ab OR 'hepatic coma'/exp OR 'hepatic coma':ti,ab OR 'liver transplantation'/exp OR 'liver transplant':ti,ab OR 'liver transplantation':ti,ab OR 'hepatic transplant':ti,ab OR 'hepatic transplantation':ti,ab OR 'liver graft':ti,ab OR 'liver grafting':ti,ab OR 'cardiac hepatopathy':ti,ab OR 'mitochondrial liver disease':ti,ab OR 'hepatorenal syndrome'/exp OR 'hepatorenal syndrome':ti,ab OR 'portal hypertension'/exp OR 'portal hypertension':ti,ab OR 'hepatopulmonary syndrome'/exp OR 'hepato-pulmonary syndrome':ti,ab OR 'hepatopulmonary syndrome':ti,ab OR 'porto-pulmonary hypertension':ti,ab OR 'decompensated liver disease':ti,ab OR 'ascites'/exp OR 'ascites':ti,ab OR 'liver-based coagulopathy':ti,ab OR 'molecular absorbent recirculating system':ti,ab OR 'MARS':ti,ab OR 'hepatocyte transplantation'/exp OR 'hepatocyte transplantation':ti,ab OR 'hepatocyte transplant':ti,ab OR 'liver cell transplantation':ti,ab OR 'liver cell transplant':ti,ab OR 'Kings College Hospital Criteria':ti,ab OR 'Liver injury unit score':ti,ab OR 'LIU score':ti,ab OR 'acute physiology and chronic health evaluation II':ti,ab OR 'acute physiology and chronic health evaluation III':ti,ab OR 'APACHE III':ti,ab OR 'APACHE II':ti,ab OR 'precision medicine':ti,ab OR 'personalized medicine'/exp OR 'growth mixture modeling':ti,ab OR 'blood clotting Factor 5'/exp OR 'Factor V':ti,ab OR 'factor five':ti,ab OR 'AC globulin':ti,ab OR 'factor Pi':ti,ab OR 'proaccelerin':ti,ab OR 'factor 5':ti,ab OR 'blood clotting Factor VII'/exp OR 'Factor VII':ti,ab OR 'factor seven':ti,ab OR 'proconvertin':ti,ab OR 'stable factor':ti,ab OR 'factor 7':ti,ab OR 'blood clotting Factor VIII'/exp OR 'Factor VIII':ti,ab OR 'thromboplastinogen':ti,ab OR 'hyatt-c':ti,ab OR 'hyattc':ti,ab OR 'hyate c':ti,ab OR 'hyatec':ti,ab OR 'factor 8':ti,ab OR 'lactic acid'/exp OR 'lactic acid':ti,ab OR 'vitamin D binding protein'/exp OR 'vitamin d-binding protein':ti,ab OR 'vitamin d-binding globulin':ti,ab OR 'group-specific component globulin':ti,ab OR '25-hydroxycholecalciferol-binding protein':ti,ab OR '25-hydroxyvitamin d binding protein':ti,ab OR 'transcalciferin':ti,ab OR '25-HCC-binding protein':ti,ab OR 'calciferol binding protein':ti,ab OR 'actin-free Gc-globulin':ti,ab OR 'Gc-globulin':ti,ab OR 'metabolic liver disease':ti,ab OR 'Liver cirrhosis'/exp OR 'cirrhosis':ti,ab OR 'cirrhotic':ti,ab OR 'jaundice'/exp OR 'jaundice':ti,ab OR 'cholestasis'/exp OR 'cholestasis':ti,ab OR 'bile duct obstruction':ti,ab OR 'biliary stasis':ti,ab OR 'hyperammonemia'/exp OR 'hyperammonemia':ti,ab OR 'liver support'/exp OR 'extracorporeal liver support device':ti,ab OR 'synthetic dysfunction':ti,ab OR 'chronic liver failure sequential organ failure assessment':ti,ab OR 'CLIF SOFA':ti,ab OR 'child pugh score'/exp OR 'child-Turcotte Pugh':ti,ab OR 'MELD':ti,ab OR 'APRI':ti,ab OR 'liver stiffness'/exp OR 'liver stiffness':ti,ab OR 'elastograph'/exp OR 'elastograph':ti,ab OR 'fibroscan':ti,ab OR (('blood'/exp OR 'blood':ti,ab OR 'serum'/exp OR 'serum':ti,ab) AND ('aspartate aminotransferase'/exp OR 'aspartate aminotransaminase':ti,ab OR 'AST':ti,ab OR 'Leucine aminotransferase'/exp OR 'leucine aminotransferase':ti,ab OR 'leucine transaminase':ti,ab OR 'leucine amino transferase':ti,ab OR 'ALT':ti,ab OR 'bilirubin'/exp OR 'bilirubin':ti,ab OR 'ammonia'/exp OR 'ammonia':ti,ab))) AND ('Child'/de OR 'Infant'/de OR 'Adolescent'/de OR 'preschool child'/exp OR 'child':ti,ab OR 'infant':ti,ab OR 'adolescent' OR 'children' OR 'infants' OR 'adolescents' OR 'pediatric patient' OR 'pediatric patients' OR 'adolescence' OR 'youth' OR 'youths' OR 'juvenile'/exp OR 'juvenile' OR 'childhood' OR 'teenager' OR 'teenagers' OR 'teen' OR 'teens' OR 'preschool child' OR 'neonate' OR 'newborn'/de OR 'newborn':ti,ab OR 'baby' OR 'babies' OR 'pediatric':ti,ab OR 'pediatrics':ti,ab OR 'paediatric':ti,ab OR 'paediatrics':ti,ab OR 'toddler'/exp OR 'toddler' OR 'toddlers')

AND ('Outcome Assessment'/exp OR 'Critical Care Outcome'/exp OR 'mortality'/exp OR 'length of stay'/exp OR 'quality of life'/exp OR 'outcome' OR 'mortality' OR 'length of stay' OR 'LOS' OR 'quality of life' OR 'PedsQL' OR 'functional morbidity' OR 'PCPC' OR 'pediatric cerebral performance category' OR 'POPC' OR 'pediatric overall performance category' OR 'FSS' OR 'functional status scale' OR 'WeeFIM' OR 'PEDI' OR ('pediatric evaluation' AND 'disability inventory') OR 'MSEL' OR 'mullen scales' OR 'WISC':ti,ab OR 'wechsler intelligence scale' OR 'BSID' OR 'bayley scales' OR 'VABS' OR 'vineland adaptive behavior scale' OR 'Depression assessment'/exp OR 'depression':ti,ab OR 'PTSD' OR 'post-traumatic stress disorder' OR 'post-traumatic stress' OR 'posttraumatic stress disorder'/exp OR 'acute stress disorder'/exp OR 'acute stress



disorder' OR 'acute traumatic stress disorder' OR 'tracheostomy'/exp OR 'tracheostomy' OR 'Gastrostomy'/exp OR 'gastrostomy' OR 'stomach tube'/exp OR 'gastric tube' OR 'NPMODS' OR 'progressive multiple organ dysfunction' OR 'organ dysfunction resolution' OR 'cost of medical care' OR 'health care costs'/exp OR 'symptom improvement' OR 'duration of life' OR 'quality of dying' OR 'quality of death' OR 'Quality adjusted life year'/exp OR 'neurocognitive' OR 'neuro-cognitive' OR 'neuro cognitive' OR 'neurocognition' OR 'neurodevelopmental' OR 'neuro-developmental' OR 'neuro developmental' OR 'neurodevelopment' OR 'neuro-development' OR 'neuro development' OR 'neurologic' OR 'neurological' OR 'cognitive' OR 'HRQOL' OR 'functional outcome' OR 'functional outcomes' OR 'pediatric stroke outcome measures' OR 'Glasgow Outcome Score' OR 'GOS' OR 'extracorporeal life support' OR ('waiting lists' AND 'heart transplantation'/exp) OR 'extracorporeal oxygenation'/exp OR 'extracorporeal membrane oxygenation' OR 'ECMO' OR 'mechanical circulatory support' OR 'left ventricular assist device' OR 'LVAD' OR 'ventilator free' OR 'VFD' OR 'inotrope dependency' OR 'mechanical support' OR 'seizure'/exp OR 'seizure' OR 'seizures' OR 'pedNIHSS' OR 'pediatric NIH Stroke Scale' OR 'neurologic disability' OR 'neurological disability')

AND

('predictive value'/exp OR 'sensitivity and specificity'/exp OR 'False Negative result'/exp OR 'False Positive result'/exp OR 'specificity' OR 'false negative' OR 'false positive' OR 'predict' OR 'predicting' OR 'predictive' OR 'prediction' OR 'predictor' OR 'accurate' OR 'accuracy' OR 'precision' OR 'precise' OR 'validity' OR 'reliability' OR 'discrimination' OR 'calibration' OR 'sensitivity to change' OR 'goodness of fit')

NOT ('editorial'/it OR 'letter'/it OR 'note'/it OR 'review'/it OR 'chapter'/it OR 'conference abstract'/it)

Searched 11/29/2017, 4305 results

Searched 1/8/2020, 1476 results

### Renal dysfunction

11/21/17 search  
 Total results: 6739  
 Duplicate results: 1690  
 Results imported into Covidence: 5049  
 Covidence dedupes: 25  
 Total for title/abstract screening: 5024

1/7/2020 update (2017-2020)  
 Total results: 1667  
 Duplicate results: 419  
 Results imported into Covidence: 1248  
 Covidence dedupes: 296  
 Total for title/abstract screening: 952

#### Pubmed:

("renal insufficiency"[mh] OR "renal insufficiency"[TW] OR "renal failure"[TW] OR "renal dysfunction"[TW] OR "kidney failure"[TW] OR "kidney insufficiency"[TW] OR "kidney dysfunction"[TW] OR "renal replacement therapy"[mh] OR "renal replacement therapy"[TW] OR "CRRT"[TW] OR "dialysis"[TW] OR "hemodialysis"[TW] OR "acute kidney injury"[mh] OR "acute kidney injury"[TW] OR "AKI"[TW] OR "acute kidney injuries"[TW] OR "acute renal injury"[TW] OR "acute renal injuries"[TW] OR "acute renal failure"[TW] OR "ARF"[TW] OR "acute kidney failure"[TW] OR "acute kidney disease"[TW] OR "acute kidney insufficiency"[TW] OR "acute renal insufficiency"[TW] OR "pRIFLE"[TW] OR "pediatric RIFLE"[TW] OR "AKIN"[TW] OR "AKI network"[TW] OR "KDIGO"[TW] OR "kidney disease improving global outcomes"[TW] OR "oliguria"[mh] OR "oliguria"[TW] OR "anuria"[mh] OR "anuria"[TW] OR "nephrotoxicity"[TW] OR "kidney tubular necrosis, acute"[mh] OR "acute tubular necrosis"[TW] OR "acute kidney tubular necrosis"[TW] OR (("kidney"[TW] OR "renal") AND ("fluid overload"[TW] OR "fluid balance"[TW] OR "biomarkers"[mh] OR "biomarkers"[TW] OR "biomarker")) OR "renal angina"[TW] OR "neutrophil gelatinase-associated lipocalin"[TW] OR "NGAL"[TW] OR "nephrocheck"[TW] OR "TIMP2"[TW] OR "TIMP-2"[TW] OR "IGFBP7"[TW] OR "Tissue Inhibitor of Metalloproteinase-2"[mh] OR "tissue inhibitor metalloproteinase-2"[TW] OR "IGF-binding protein-7"[TW] OR "Cystatin C"[mh] OR "cystatin c"[TW] OR "hemofiltration"[mh] OR "hemofiltration"[TW] OR "CVVH"[TW] OR "CVVHD"[TW] OR "CVVHDF"[TW] OR "continuous venovenous hemodiafiltration"[TW] OR "SLED"[TW] OR "renal support"[TW] OR "PD"[tiab] OR "HD"[tiab] OR "PIRRT")

AND

("Child"[mh] OR "Infant"[mh] OR "Infant, Newborn"[mh] OR "Adolescent"[mh] OR "Child, Preschool"[mh] OR "child"[tiab] OR "infant"[all] OR "adolescent"[all] OR "children"[all] OR "infants"[all] OR "adolescents"[all] OR "pediatric patient"[all] OR "pediatric patients"[all] OR "adolescence"[all] OR "youth"[all] OR "youths"[all] OR

"juvenile"[all] OR "childhood"[all] OR "teenager"[all] OR "teenagers"[all] OR "teen"[all] OR "teens"[all] OR "preschool child"[all] OR "neonate"[all] OR "newborn"[all] OR "baby"[all] OR "babies"[all] OR "pediatric"[tiab] OR "pediatrics"[tiab] OR "paediatric"[tiab] OR "paediatrics"[tiab] OR "toddler"[all] OR "toddlers"[all])

AND

("Patient Outcome Assessment"[mh] OR "Critical Care Outcomes"[mh] OR "mortality"[mh] OR "length of stay"[mh] OR "quality of life"[mh] OR "outcome"[tw] OR "mortality"[tw] OR "length of stay"[tw] OR "LOS"[tw] OR "quality of life"[tw] OR "PedsQL"[tw] OR "functional morbidity"[tw] OR "PCPC"[tw] OR "pediatric cerebral performance category"[tw] OR "POPC"[tw] OR "pediatric overall performance category"[tw] OR "FSS"[tw] OR "functional status scale"[tw] OR "WeeFIM"[tw] OR "PEDI"[tw] OR ("pediatric evaluation" AND "disability inventory") OR "MSEL"[tw] OR "mullen scales"[tw] OR "WISC"[tiab] OR "wechsler intelligence scale"[tw] OR "BSID"[tw] OR "bayley scales"[tw] OR "VABS"[tw] OR "vineland adaptive behavior scale"[tw] OR "Depression/diagnosis"[mh] OR "depression"[tiab] OR "PTSD"[tw] OR "post-traumatic stress disorder"[tw] OR "post-traumatic stress"[tw] OR "Stress Disorders, Post-Traumatic"[mh] OR "Stress Disorders, Traumatic, Acute"[mh] OR "acute stress disorder"[tw] OR "acute traumatic stress disorder"[tw] OR "tracheostomy"[mh] OR "tracheostomy"[tw] OR "Gastrostomy"[mh] OR "gastrostomy"[tw] OR "gastric tube"[tw] OR "NPMODS"[tw] OR "progressive multiple organ dysfunction"[tw] OR "organ dysfunction resolution"[tw] OR "cost of medical care"[tw] OR "health care costs"[mh] OR "symptom improvement"[tw] OR "duration of life"[tw] OR "quality of dying"[tw] OR "quality of death"[tw] OR "Quality-adjusted life years"[mh] OR "neurocognitive"[tw] OR "neuro-cognitive"[tw] OR "neuro cognitive"[tw] OR "neurocognition"[tw] OR "neurodevelopmental"[tw] OR "neuro-developmental"[tw] OR "neuro developmental"[tw] OR "neurodevelopment"[tw] OR "neuro-development"[tw] OR "neuro development"[tw] OR "neurologic"[tw] OR "neurological"[tw] OR "cognitive"[tw] OR "HRQOL"[tw] OR "functional outcome"[tw] OR "functional outcomes"[tw] OR "pediatric stroke outcome measures"[tw] OR "Glasgow Outcome Score"[tw] OR "GOS"[tw] OR "extracorporeal life support"[tw] OR ("waiting lists"[mh] AND "heart transplantation"[mh]) OR "extracorporeal membrane oxygenation"[mh] OR "extracorporeal membrane oxygenation"[tw] OR "ECMO"[tw] OR "mechanical circulatory support"[tw] OR "left ventricular assist device"[tw] OR "LVAD"[tw] OR "ventilator free"[tw] OR "VFD"[tw] OR "inotrope dependency"[tw] OR "mechanical support"[tw] OR "seizures"[mh] OR "seizure"[tw] OR "seizures"[tw] OR "pedNiHSS"[tw] OR "pediatric NIH Stroke Scale"[tw] OR "neurologic disability"[tw] OR "neurological disability"[tw] OR "renal recovery"[TW] OR "renal insufficiency, chronic"[mh] OR "chronic kidney disease"[TW] OR "CKD"[TW] OR "chronic renal insufficiency"[TW] OR "proteinuria"[mh] OR "proteinuria"[TW] OR "albuminuria"[TW] OR "hemoglobinuria"[TW] OR "diabetic nephropathies"[mh] OR "microalbuminuria"[TW] OR "microalbuminuria"[TW] OR "hypertension"[mh] OR "hypertension"[TW] OR "kidney failure, chronic"[mh] OR "chronic kidney failure"[TW] OR "end stage renal disease"[TW] OR "end stage kidney disease")

AND

("predictive value of tests"[mh] OR "sensitivity and specificity"[mh] OR "False Negative Reactions"[mh] OR "False Positive Reactions"[mh] OR "specificity"[TW] OR "false negative"[TW] OR "false positive"[TW] OR "predict"[TW] OR "predicting"[TW] OR "predictive"[TW] OR "prediction"[TW] OR "predictor"[TW] OR "accurate"[TW] OR "accuracy"[TW] OR "precision"[TW] OR "precise"[TW] OR "validity"[TW] OR "reliability"[TW] OR "discrimination"[TW] OR "calibration"[TW] OR "sensitivity to change"[TW] OR "goodness of fit")

NOT ("editorial"[pt] OR "guideline"[pt] OR "letter"[pt] OR "review"[pt] OR "meta-analysis"[pt])

Searched 11/21/2017, 3900 results

Searched 1/7/2020, 850 results

#### **Embase:**

('kidney failure'/exp OR 'renal insufficiency':ti,ab OR 'renal failure':ti,ab OR 'renal dysfunction':ti,ab OR 'kidney failure':ti,ab OR 'kidney insufficiency':ti,ab OR 'kidney dysfunction':ti,ab OR 'renal replacement therapy'/exp OR 'renal replacement therapy':ti,ab OR 'CRRT':ti,ab OR 'dialysis':ti,ab OR 'hemodialysis':ti,ab OR 'acute kidney failure'/exp OR 'acute kidney injury':ti,ab OR 'AKI':ti,ab OR 'acute kidney injuries':ti,ab OR 'acute renal injury':ti,ab OR 'acute renal injuries':ti,ab OR 'acute renal failure':ti,ab OR 'ARF':ti,ab OR 'acute kidney failure':ti,ab OR 'acute kidney disease':ti,ab OR 'acute kidney insufficiency':ti,ab OR 'acute renal insufficiency':ti,ab OR 'pRIFLE':ti,ab OR 'pediatric RIFLE':ti,ab OR 'AKIN':ti,ab OR 'AKI network':ti,ab OR 'KDIGO':ti,ab OR 'kidney disease improving global outcomes':ti,ab OR 'oliguria'/exp OR 'oliguria':ti,ab OR

'anuria'/exp OR 'anuria':ti,ab OR 'nephrotoxicity':ti,ab OR 'kidney tubule necrosis'/exp OR 'acute tubular necrosis':ti,ab OR 'acute kidney tubular necrosis':ti,ab OR (('kidney':ti,ab OR 'renal':ti,ab) AND ('fluid overload':ti,ab OR 'fluid balance':ti,ab OR 'biological marker'/exp OR 'biomarkers':ti,ab OR 'biomarker':ti,ab)) OR 'renal angina':ti,ab OR 'neutrophil gelatinase-associated lipocalin':ti,ab OR 'NGAL':ti,ab OR 'nephrocheck':ti,ab OR 'TIMP2':ti,ab OR 'TIMP-2':ti,ab OR 'IGFBP7':ti,ab OR 'tissue inhibitor of metalloproteinase 2'/exp OR 'tissue inhibitor metalloproteinase-2':ti,ab OR 'IGF-binding protein-7':ti,ab OR 'Cystatin C'/exp OR 'cystatin c':ti,ab OR 'hemofiltration'/exp OR 'hemofiltration':ti,ab OR 'CVVH':ti,ab OR 'CVVHD':ti,ab OR 'CVVHDF':ti,ab OR 'continuous venovenous hemodiafiltration':ti,ab OR 'SLED':ti,ab OR 'renal support':ti,ab OR 'PD':ti,ab OR 'HD':ti,ab OR 'PIRRT':ti,ab)

AND

('Child'/de OR 'Infant'/de OR 'Adolescent'/de OR 'preschool child'/exp OR 'child':ti,ab OR 'infant':ti,ab OR 'adolescent':ti,ab OR 'children':ti,ab OR 'infants':ti,ab OR 'adolescents':ti,ab OR 'pediatric patient':ti,ab OR 'pediatric patients':ti,ab OR 'adolescence':ti,ab OR 'youth':ti,ab OR 'youths':ti,ab OR 'juvenile'/exp OR 'juvenile':ti,ab OR 'childhood':ti,ab OR 'teenager':ti,ab OR 'teenagers':ti,ab OR 'teen':ti,ab OR 'teens':ti,ab OR 'preschool child':ti,ab OR 'neonate':ti,ab OR 'newborn'/de OR 'newborn':ti,ab OR 'baby':ti,ab OR 'babies':ti,ab OR 'pediatric':ti,ab OR 'pediatrics':ti,ab OR 'paediatric':ti,ab OR 'paediatrics':ti,ab OR 'toddler'/exp OR 'toddler':ti,ab OR 'toddlers')

AND

('Outcome Assessment'/exp OR 'Critical Care Outcome'/exp OR 'mortality'/exp OR 'length of stay'/exp OR 'quality of life'/exp OR 'outcome':ti,ab OR 'mortality':ti,ab OR 'length of stay':ti,ab OR 'LOS':ti,ab OR 'quality of life':ti,ab OR 'PedsQL':ti,ab OR 'functional morbidity':ti,ab OR 'PCPC':ti,ab OR 'pediatric cerebral performance category':ti,ab OR 'POPC':ti,ab OR 'pediatric overall performance category':ti,ab OR 'FSS':ti,ab OR 'functional status scale':ti,ab OR 'WeeFIM':ti,ab OR 'PEDI':ti,ab OR ('pediatric evaluation' AND 'disability inventory') OR 'MSEL':ti,ab OR 'mullen scales':ti,ab OR 'WISC':ti,ab OR 'wechsler intelligence scale':ti,ab OR 'BSID':ti,ab OR 'bayley scales':ti,ab OR 'VABS':ti,ab OR 'vineland adaptive behavior scale':ti,ab OR 'Depression assessment'/exp OR 'depression':ti,ab OR 'PTSD':ti,ab OR 'post-traumatic stress disorder':ti,ab OR 'post-traumatic stress':ti,ab OR 'posttraumatic stress disorder'/exp OR 'acute stress disorder'/exp OR 'acute stress disorder':ti,ab OR 'acute traumatic stress disorder':ti,ab OR 'tracheostomy'/exp OR 'tracheostomy':ti,ab OR 'Gastrostomy'/exp OR 'gastrostomy':ti,ab OR 'stomach tube'/exp OR 'gastric tube':ti,ab OR 'NPMODS':ti,ab OR 'progressive multiple organ dysfunction':ti,ab OR 'organ dysfunction resolution':ti,ab OR 'cost of medical care':ti,ab OR 'health care costs'/exp OR 'symptom improvement':ti,ab OR 'duration of life':ti,ab OR 'quality of dying':ti,ab OR 'quality of death':ti,ab OR 'Quality adjusted life year'/exp OR 'neurocognitive':ti,ab OR 'neuro-cognitive':ti,ab OR 'neuro cognitive':ti,ab OR 'neurocognition':ti,ab OR 'neurodevelopmental':ti,ab OR 'neuro-developmental':ti,ab OR 'neuro developmental':ti,ab OR 'neurodevelopment':ti,ab OR 'neuro-development':ti,ab OR 'neuro development':ti,ab OR 'neurologic':ti,ab OR 'neurological':ti,ab OR 'cognitive':ti,ab OR 'HRQOL':ti,ab OR 'functional outcome':ti,ab OR 'functional outcomes':ti,ab OR 'pediatric stroke outcome measures':ti,ab OR 'Glasgow Outcome Score':ti,ab OR 'GOS':ti,ab OR 'extracorporeal life support':ti,ab OR ('waiting lists' AND 'heart transplantation'/exp) OR 'extracorporeal oxygenation'/exp OR 'extracorporeal membrane oxygenation':ti,ab OR 'ECMO':ti,ab OR 'mechanical circulatory support':ti,ab OR 'left ventricular assist device':ti,ab OR 'LVAD':ti,ab OR 'ventilator free':ti,ab OR 'VFD':ti,ab OR 'inotrope dependency':ti,ab OR 'mechanical support':ti,ab OR 'seizure'/exp OR 'seizure':ti,ab OR 'seizures':ti,ab OR 'pedNiHSS':ti,ab OR 'pediatric NIH Stroke Scale':ti,ab OR 'neurologic disability':ti,ab OR 'neurological disability':ti,ab OR 'renal recovery':ti,ab OR 'chronic kidney failure'/exp OR 'chronic kidney disease':ti,ab OR 'CKD':ti,ab OR 'chronic renal insufficiency':ti,ab OR 'proteinuria'/exp OR 'proteinuria':ti,ab OR 'albuminuria':ti,ab OR 'hemoglobinuria':ti,ab OR 'diabetic nephropathy'/exp OR 'microalbuminuria':ti,ab OR 'microalbuminuria':ti,ab OR 'hypertension'/exp OR 'hypertension':ti,ab OR 'chronic kidney failure':ti,ab OR 'end stage renal disease':ti,ab OR 'end stage kidney disease':ti,ab)

AND

('predictive value'/exp OR 'sensitivity and specificity'/exp OR 'False Negative result'/exp OR 'False Positive result'/exp OR 'specificity':ti,ab OR 'false negative':ti,ab OR 'false positive':ti,ab OR 'predict':ti,ab OR 'predicting':ti,ab OR 'predictive':ti,ab OR 'prediction':ti,ab OR 'predictor':ti,ab OR 'accurate':ti,ab OR 'accuracy':ti,ab OR 'precision':ti,ab OR 'precise':ti,ab OR 'validity':ti,ab OR 'reliability':ti,ab OR 'discrimination':ti,ab OR 'calibration':ti,ab OR 'sensitivity to change':ti,ab OR 'goodness of fit')

NOT ('editorial'/it OR 'letter'/it OR 'note'/it OR 'review'/it OR 'chapter'/it OR 'conference abstract'/it)

Searched 11/21/2017, 2839 results

Searched 1/7/2020, 817 results

### Hematologic dysfunction

12/13/2017

Total references: 11245

Duplicate references: 2248

Unique references for import to Covidence: 8997

Covidence removed duplicates: 20

References for title/abstract screening: 8977

1/6/2020 update (2017-2020)

Total references: 2814

Duplicate references: 475

Unique references for import to Covidence: 2339

Covidence removed duplicates: 637

References for title/abstract screening: 1702

#### Pubmed:

("hematologic diseases"[mh:noexp] OR "hematologic disease"[tiab] OR "hematologic diseases"[tiab] OR "anemia"[mh] OR "anemia"[tw] OR "anaemia"[tw] OR "anemic"[tw] OR "anaemic"[tw] OR "blood platelet disorders"[mh] OR "blood platelet disorders"[tw] OR "blood platelet disorder"[tw] OR "gray platelet syndrome"[mh] OR "gray platelet syndrome"[tw] OR "grey platelet syndrome"[tw] OR "Jacobsen distal 11q deletion syndrome"[mh] OR "Jacobsen distal 11q deletion syndrome"[tw] OR "jacobsen syndrome"[tw] OR "Kasabach-Merritt Syndrome"[mh] OR "kasabach-merritt syndrome"[tw] OR "thrombocytosis"[mh] OR "thrombocytosis"[tw] OR "hypoproteinemia"[mh] OR "hypoproteinemia"[tw] OR "hypoalbuminemia"[mh] OR "hypoalbuminemia"[tw] OR "bone marrow diseases"[mh:noexp] OR "bone marrow diseases"[tw] OR "bone marrow disease"[tw] OR "anemia, aplastic"[mh] OR "aplastic anemia"[tw] OR "bone marrow neoplasms"[mh] OR "bone marrow neoplasms"[tw] OR "bone marrow cancer"[tw] OR "bone marrow neoplasm"[tw] OR "polycythemia vera"[mh] OR "polycythemia vera"[tw] OR "myelodysplastic-Myeloproliferative diseases"[mh:noexp] OR "myelodysplastic-Myeloproliferative disease"[tw] OR "myelodysplastic-Myeloproliferative diseases"[tw] OR "myelodysplastic syndromes"[mh] OR "myelodysplastic syndrome"[tw] OR "myelodysplastic syndromes"[tw] OR "anemia, refractory"[mh] OR "anemia, sideroblastic"[mh] OR "hemoglobinuria, Paroxysmal"[mh] OR "myeloproliferative disorders"[mh:noexp] OR "myeloproliferative disorders"[tw] OR "myeloproliferative disorder"[tw] OR "leukemoid reaction"[mh] OR "leukemoid reaction"[tw] OR "primary myelofibrosis"[mh] OR "primary myelofibrosis"[tw] OR "myeloid metaplasia"[tw] OR "hematologic neoplasms"[mh] OR "hematologic neoplasms"[tw] OR "hematologic cancer"[tw] OR "hematologic cancers"[tw] OR "hemoglobinopathies"[mh] OR "hemoglobinopathies"[tw] OR "hemoglobinopathy"[tw] OR "sickle cell anemias"[mh] OR "sickle"[tw] OR "hemoglobin c disease"[mh] OR "hemoglobin c disease"[tw] OR "thalassemia"[mh] OR "thalassemia"[tw] OR "Hemorrhagic disorders"[mh] OR "hemorrhagic disorder"[tw] OR "hemorrhagic disorders"[tw] OR "afibrinogenemia"[mh] OR "afibrinogenemia"[tw] OR "ehlers-danlos syndrome"[mh] OR "ehlers-danlos"[tw] OR "hemangioma, Cavernous"[mh] OR "cavernous hemangioma"[tw] OR "pseudoxanthoma elasticum"[mh] OR "pseudoxanthoma elasticum"[tw] OR "Purpura, Hyperglobulinemic"[mh] OR "purpura, Schoenlein-Henoch"[mh] OR "scurvy"[mh] OR "scurvy"[tw] OR "shwartzman phenomenon"[mh] OR "shwartzman phenomenon"[tw] OR "telangiectasia, Hereditary hemorrhagic"[mh] OR "hereditary hemorrhagic telangiectasia"[tw] OR "rendu osler weber disease"[tw] OR "hypoprothrombinemias"[mh] OR "hypoprothrombinemias"[tw] OR "purpura, thrombocytopenic, idiopathic"[mh] OR "leukocyte disorders"[mh] OR "leukocyte disorders"[tw] OR "eosinophilia"[mh] OR "eosinophilia"[tw] OR "eosinophilic"[tw] OR "hypereosinophilic syndrome"[tw] OR "infectious mononucleosis"[mh] OR "mononucleosis"[tw] OR "leukocytosis"[mh] OR "leukocytosis"[tw] OR "leukopenia"[mh] OR "leukopenia"[tw] OR "leukostasis"[mh] OR "leukostasis"[tw] OR "pelger-huet anomaly"[mh] OR "leukocyte disorder"[tw] OR "pelger-huet anomaly"[tw] OR "phagocyte bactericidal dysfunction"[mh] OR "phagocyte bactericidal dysfunction"[tw] OR "phagocyte dysfunction"[tw] OR "chediak-higashi syndrome"[mh] OR "chediak-higashi syndrome"[tw] OR "Aleutian mink disease"[mh] OR "Aleutian mink disease"[tw] OR "granulomatous disease, chronic"[mh] OR "chronic granulomatous disease"[tw] OR "job syndrome"[mh] OR "job syndrome"[tw] OR "hyper IgE syndrome"[tw] OR "methemoglobinemia"[mh] OR "methemoglobinemia"[tw] OR "pancytopenia"[mh] OR "pancytopenia"[tw] OR "polycythemia"[mh] OR "polycythemia"[tw] OR "sulfhemoglobinemia"[mh] OR "sulfhemoglobinemia"[tw] OR "thrombophilia"[mh] OR "Purpura, Thrombotic Thrombocytopenic"[mh] OR "Transfusion reaction"[mh] OR "transfusion reaction"[tw] OR "Transfusion-Related Acute Lung Injury"[mh] OR "transfusion related acute

lung injury"[tw] OR "leukocyte count"[mh] OR "leukocyte count"[tw] OR "lymphocyte count"[mh] OR "lymphocyte count"[tw] OR "platelet count"[mh] OR "platelet count"[tw] OR "thrombocyte count"[tw] OR "blood cell count"[mh] OR "blood cell count"[tw] OR "thrombocytopenia"[mh] OR "thrombocytopenia"[tw] OR "erythrocyte indices"[mh] OR "erythrocyte index"[tw] OR "erythrocyte indices"[tw] OR "mean corpuscular volume"[tw] OR "MCV"[tw] OR "red blood cell distribution index"[tw] OR "red cell distribution index"[tw] OR "red cell index"[tw] OR "red blood cell index"[tw] OR "erythrocyte count"[mh] OR "erythrocyte count"[tw] OR "hematocrit"[mh] OR "hematocrit"[tw] OR "Hemoglobinometry"[mh] OR "hemoglobinometry"[tw] OR "hemoglobin determination"[tw] OR "free hemoglobin"[tw] OR "haptoglobins"[mh] OR "haptoglobins"[tw] OR "haptoglobin"[tw] OR "hemolysis"[mh] OR "hemolysis"[tw] OR "hemolytic anemia"[tw] OR "hepcidins"[mh] OR "hepcidins"[tw] OR "hepcidin"[tw] OR "prohepcidin"[tw] OR "sequestration"[tw] OR "reticulocytosis"[mh] OR "reticulocytosis"[tw] OR "reticulocytopenia"[tw] OR "bone marrow failure"[tw] OR "bone marrow failure syndromes"[nm] OR "aplasia"[tw] OR "neutropenia"[mh] OR "neutropenia"[tw] OR "lymphopenia"[mh] OR "lymphopenia"[tw] OR "T-Lymphocytopenia, Idiopathic CD4-Positive"[mh] OR "lymphocytopenia"[tw] OR "myeloid precursors"[tw] OR "myeloid precursor"[tw] OR "myeloid precursors"[tw] OR "marrow storage pool"[tw] OR "mean platelet volume"[mh] OR "mean platelet volume"[tw] OR "thrombocyte volume"[tw])

AND

("Child"[mh] OR "Infant"[mh:noexp] OR "Infant, Newborn"[mh:noexp] OR "infant, low birth weight"[mh] OR "infant, postmature"[mh] OR "Adolescent"[mh] OR "Child, Preschool"[mh] OR "child"[tiab] OR "infant"[all] OR "adolescent"[all] OR "children"[all] OR "infants"[all] OR "adolescents"[all] OR "pediatric patient"[all] OR "pediatric patients"[all] OR "adolescence"[all] OR "youth"[all] OR "youths"[all] OR "juvenile"[all] OR "childhood"[all] OR "teenager"[all] OR "teenagers"[all] OR "teen"[all] OR "teens"[all] OR "preschool child"[all] OR "neonate"[all] OR "newborn"[all] OR "baby"[all] OR "babies"[all] OR "pediatric"[tiab] OR "pediatrics"[tiab] OR "paediatric"[tiab] OR "paediatrics"[tiab] OR "toddler"[all] OR "toddlers"[all])

AND

("Patient Outcome Assessment"[mh] OR "Critical Care Outcomes"[mh] OR "mortality"[mh] OR "length of stay"[mh] OR "quality of life"[mh] OR "outcome"[tw] OR "mortality"[tw] OR "length of stay"[tw] OR "LOS"[tw] OR "quality of life"[tw] OR "PedsQL"[tw] OR "functional morbidity"[tw] OR "PCPC"[tw] OR "pediatric cerebral performance category"[tw] OR "POPC"[tw] OR "pediatric overall performance category"[tw] OR "FSS"[tw] OR "functional status scale"[tw] OR "WeeFIM"[tw] OR "PEDI"[tw] OR ("pediatric evaluation" AND "disability inventory") OR "MSEL"[tw] OR "mullen scales"[tw] OR "WISC"[tiab] OR "wechsler intelligence scale"[tw] OR "BSID"[tw] OR "bayley scales"[tw] OR "VABS"[tw] OR "vineland adaptive behavior scale"[tw] OR "Depression/diagnosis"[mh] OR "depression"[tiab] OR "PTSD"[tw] OR "post-traumatic stress disorder"[tw] OR "post-traumatic stress"[tw] OR "Stress Disorders, Post-Traumatic"[mh] OR "Stress Disorders, Traumatic, Acute"[mh] OR "acute stress disorder"[tw] OR "acute traumatic stress disorder"[tw] OR "tracheostomy"[mh] OR "tracheostomy"[tw] OR "Gastrostomy"[mh] OR "gastrostomy"[tw] OR "gastric tube"[tw] OR "NPMODS"[tw] OR "progressive multiple organ dysfunction"[tw] OR "organ dysfunction resolution"[tw] OR "cost of medical care"[tw] OR "health care costs"[mh] OR "symptom improvement"[tw] OR "duration of life"[tw] OR "quality of dying"[tw] OR "quality of death"[tw] OR "Quality-adjusted life years"[mh] OR "neurocognitive"[tw] OR "neuro-cognitive"[tw] OR "neuro cognitive"[tw] OR "neurocognition"[tw] OR "neurodevelopmental"[tw] OR "neuro-developmental"[tw] OR "neuro developmental"[tw] OR "neurodevelopment"[tw] OR "neuro-development"[tw] OR "neuro development"[tw] OR "neurologic"[tw] OR "neurological"[tw] OR "cognitive"[tw] OR "HRQOL"[tw] OR "functional outcome"[tw] OR "functional outcomes"[tw] OR "pediatric stroke outcome measures"[tw] OR "Glasgow Outcome Score"[tw] OR "GOS"[tw] OR "extracorporeal life support"[tw] OR ("waiting lists"[mh] AND "heart transplantation"[mh]) OR "extracorporeal membrane oxygenation"[mh] OR "extracorporeal membrane oxygenation"[tw] OR "ECMO"[tw] OR "mechanical circulatory support"[tw] OR "left ventricular assist device"[tw] OR "LVAD"[tw] OR "ventilator free"[tw] OR "VFD"[tw] OR "inotrope dependency"[tw] OR "mechanical support"[tw] OR "seizures"[mh] OR "seizure"[tw] OR "seizures"[tw] OR "pedNiHSS"[tw] OR "pediatric NIH Stroke Scale"[tw] OR "neurologic disability"[tw] OR "neurological disability"[tw])

AND

("predictive value of tests"[mh] OR "sensitivity and specificity"[mh] OR "False Negative Reactions"[mh] OR "False Positive Reactions"[mh] OR "specificity" OR "false negative" OR "false positive" OR "predict" OR "predicting" OR "predictive" OR "prediction" OR "predictor" OR "accurate" OR "accuracy" OR "precision" OR

"precise" OR "validity" OR "reliability" OR "discrimination" OR "calibration" OR "sensitivity to change" OR "goodness of fit")

NOT ("editorial"[pt] OR "guideline"[pt] OR "letter"[pt] OR "review"[pt] OR "meta-analysis"[pt])

Searched 12/13/2017, 4417 results

Searched 1/6/2020, 857 results

**Embase:**

('hematologic disease'/de OR 'hematologic disease':ti,ab OR 'hematologic diseases':ti,ab OR 'anemia'/exp OR 'anemia':ti,ab OR 'anaemia':ti,ab OR 'anemic':ti,ab OR 'anaemic':ti,ab OR 'thrombocyte disorder'/exp OR 'blood platelet disorders':ti,ab OR 'blood platelet disorder':ti,ab OR 'gray platelet syndrome'/exp OR 'gray platelet syndrome':ti,ab OR 'grey platelet syndrome':ti,ab OR 'Jacobsen syndrome'/exp OR 'jacobsen syndrome':ti,ab OR 'Jacobsen distal 11q deletion syndrome':ti,ab OR 'Kasabach-Merritt Syndrome'/exp OR 'kasabach-merritt syndrome':ti,ab OR 'thrombocytosis'/exp OR 'thrombocytosis':ti,ab OR 'hypoproteinemia'/exp OR 'hypoproteinemia':ti,ab OR 'hypoalbuminemia'/exp OR 'hypoalbuminemia':ti,ab OR 'bone marrow disease'/de OR 'bone marrow diseases':ti,ab OR 'bone marrow disease':ti,ab OR 'aplastic anemia'/exp OR 'aplastic anemia':ti,ab OR 'bone marrow cancer'/exp OR 'bone marrow cancer':ti,ab OR 'bone marrow neoplasms':ti,ab OR 'bone marrow neoplasm':ti,ab OR 'polycythemia vera'/exp OR 'polycythemia vera':ti,ab OR 'mixed myelodysplastic myeloproliferative disease'/de OR 'myelodysplastic-Myeloproliferative disease':ti,ab OR 'myelodysplastic-Myeloproliferative diseases':ti,ab OR 'myelodysplastic syndrome'/exp OR 'myelodysplastic syndrome':ti,ab OR 'myelodysplastic syndromes':ti,ab OR 'refractory anemia'/exp OR 'sideroblastic anemia'/exp OR 'paroxysmal nocturnal hemoglobinuria'/exp OR 'myeloproliferative disorder'/de OR 'myeloproliferative disorders':ti,ab OR 'myeloproliferative disorder':ti,ab OR 'leukemoid reaction'/exp OR 'leukemoid reaction':ti,ab OR 'myeloid metaplasia'/exp OR 'primary myelofibrosis':ti,ab OR 'hematologic neoplasms':ti,ab OR 'hematologic cancer':ti,ab OR 'hematologic cancers':ti,ab OR 'hemoglobinopathy'/exp OR 'hemoglobinopathies':ti,ab OR 'hemoglobinopathy':ti,ab OR 'sickle cell anemia'/exp OR 'sickle':ti,ab OR 'hemoglobin c disease'/exp OR 'hemoglobin c disease':ti,ab OR 'thalassemia'/exp OR 'thalassemia':ti,ab OR 'hemorrhagic disorder':ti,ab OR 'hemorrhagic disorders':ti,ab OR 'afibrinogenemia'/exp OR 'afibrinogenemia':ti,ab OR 'ehlers-danlos syndrome'/exp OR 'ehlers-danlos':ti,ab OR 'cavernous hemangioma'/exp OR 'cavernous hemangioma':ti,ab OR 'pseudoxanthoma elasticum'/exp OR 'pseudoxanthoma elasticum':ti,ab OR 'Purpura'/exp OR 'anaphylactoid purpura'/exp OR 'scurvy'/exp OR 'scurvy':ti,ab OR 'shwartzman phenomenon'/exp OR 'shwartzman phenomenon':ti,ab OR 'rendu osler weber disease'/exp OR 'rendu osler weber disease':ti,ab OR 'hereditary hemorrhagic telangiectasia':ti,ab OR 'hypoprothrombinemia'/exp OR 'hypoprothrombinemias':ti,ab OR 'idiopathic thrombocytopenic purpura'/exp OR 'leukocyte disorder'/exp OR 'leukocyte disorders':ti,ab OR 'eosinophilia'/exp OR 'eosinophilia':ti,ab OR 'eosinophilic':ti,ab OR 'hypereosinophilic syndrome':ti,ab OR 'mononucleosis'/exp OR 'mononucleosis':ti,ab OR 'leukocytosis'/exp OR 'leukocytosis':ti,ab OR 'leukopenia'/exp OR 'leukopenia':ti,ab OR 'leukostasis'/exp OR 'leukostasis':ti,ab OR 'leukocyte disorder'/exp OR 'pelger-huet anomaly':ti,ab OR 'phagocyte dysfunction'/exp OR 'phagocyte bactericidal dysfunction':ti,ab OR 'chediak higashi syndrome'/exp OR 'chediak-higashi syndrome':ti,ab OR 'Aleutian mink disease'/exp OR 'Aleutian mink disease':ti,ab OR 'chronic granulomatous disease'/exp OR 'chronic granulomatous disease':ti,ab OR 'hyper IgE syndrome'/exp OR 'hyper IgE syndrome':ti,ab OR 'job syndrome':ti,ab OR 'methemoglobinemia'/exp OR 'methemoglobinemia':ti,ab OR 'pancytopenia'/exp OR 'pancytopenia':ti,ab OR 'polycythemia'/exp OR 'polycythemia':ti,ab OR 'sulfhemoglobinemia':ti,ab OR 'thrombophilia'/exp OR 'Thrombotic Thrombocytopenic purpura'/exp OR 'blood Transfusion reaction'/exp OR 'transfusion reaction':ti,ab OR 'Transfusion Related Acute Lung Injury'/exp OR 'transfusion related acute lung injury':ti,ab OR 'leukocyte count'/exp OR 'leukocyte count':ti,ab OR 'lymphocyte count'/exp OR 'lymphocyte count':ti,ab OR 'thrombocyte count'/exp OR 'thrombocyte count':ti,ab OR 'platelet count':ti,ab OR 'blood cell count'/exp OR 'blood cell count':ti,ab OR 'thrombocytopenia'/exp OR 'thrombocytopenia':ti,ab OR 'mean corpuscular volume'/exp OR 'MCV':ti,ab OR 'mean corpuscular volume':ti,ab OR 'erythrocyte index':ti,ab OR 'erythrocyte indices':ti,ab OR 'red blood cell distribution index':ti,ab OR 'red cell distribution index':ti,ab OR 'red cell index':ti,ab OR 'red blood cell index':ti,ab OR 'erythrocyte count' OR 'erythrocyte count':ti,ab OR 'hematocrit'/exp OR 'hematocrit':ti,ab OR 'hemoglobin determination'/exp OR 'hemoglobinometry':ti,ab OR 'free hemoglobin':ti,ab OR 'haptoglobin'/exp OR 'haptoglobins':ti,ab OR 'haptoglobin':ti,ab OR 'hemolysis'/exp OR 'hemolysis':ti,ab OR 'hemolytic anemia':ti,ab OR 'hepcidin'/exp OR 'hepcidins':ti,ab OR 'hepcidin':ti,ab OR 'prohepcidin':ti,ab OR

'sequestration':ti,ab OR 'reticulocytosis'/exp OR 'reticulocytosis':ti,ab OR 'reticulocytopenia':ti,ab OR 'bone marrow failure':ti,ab OR 'bone marrow depression'/exp OR 'aplasia':ti,ab OR 'neutropenia'/exp OR 'neutropenia':ti,ab OR 'lymphocytopenia'/exp OR 'lymphopenia':ti,ab OR 'lymphocytopenia':ti,ab OR 'myeloid precursors':ti,ab OR 'myeloid precursor':ti,ab OR 'myeloid precursors':ti,ab OR 'marrow storage pool':ti,ab OR 'thrombocyte volume'/exp OR 'thrombocyte volume':ti,ab OR 'mean platelet volume' OR 'mean platelet volume':ti,ab)

AND

('Child'/de OR 'Infant'/de OR 'Adolescent'/de OR 'preschool child'/exp OR 'child':ti,ab OR 'infant':ti,ab OR 'adolescent' OR 'children' OR 'infants' OR 'adolescents' OR 'pediatric patient' OR 'pediatric patients' OR 'adolescence' OR 'youth' OR 'youths' OR 'juvenile'/exp OR 'juvenile' OR 'childhood' OR 'teenager' OR 'teenagers' OR 'teen' OR 'teens' OR 'preschool child' OR 'neonate' OR 'newborn'/de OR 'newborn':ti,ab OR 'baby' OR 'babies' OR 'pediatric':ti,ab OR 'pediatrics':ti,ab OR 'paediatric':ti,ab OR 'paediatrics':ti,ab OR 'toddler'/exp OR 'toddler' OR 'toddlers')

AND

('Outcome Assessment'/exp OR 'Critical Care Outcome'/exp OR 'mortality'/exp OR 'length of stay'/exp OR 'quality of life'/exp OR 'outcome' OR 'mortality' OR 'length of stay' OR 'LOS' OR 'quality of life' OR 'PedsQL' OR 'functional morbidity' OR 'PCPC' OR 'pediatric cerebral performance category' OR 'POPC' OR 'pediatric overall performance category' OR 'FSS' OR 'functional status scale' OR 'WeeFIM' OR 'PEDI' OR ('pediatric evaluation' AND 'disability inventory') OR 'MSEL' OR 'mullen scales' OR 'WISC':ti,ab OR 'wechsler intelligence scale' OR 'BSID' OR 'bayley scales' OR 'VABS' OR 'vineland adaptive behavior scale' OR 'Depression assessment'/exp OR 'depression':ti,ab OR 'PTSD' OR 'post-traumatic stress disorder' OR 'post-traumatic stress' OR 'posttraumatic stress disorder'/exp OR 'acute stress disorder'/exp OR 'acute stress disorder' OR 'acute traumatic stress disorder' OR 'tracheostomy'/exp OR 'tracheostomy' OR 'Gastrostomy'/exp OR 'gastrostomy' OR 'stomach tube'/exp OR 'gastric tube' OR 'NPMODS' OR 'progressive multiple organ dysfunction' OR 'organ dysfunction resolution' OR 'cost of medical care' OR 'health care costs'/exp OR 'symptom improvement' OR 'duration of life' OR 'quality of dying' OR 'quality of death' OR 'Quality adjusted life year'/exp OR 'neurocognitive' OR 'neuro-cognitive' OR 'neuro cognitive' OR 'neurocognition' OR 'neurodevelopmental' OR 'neuro-developmental' OR 'neuro developmental' OR 'neurodevelopment' OR 'neuro-development' OR 'neuro development' OR 'neurologic' OR 'neurological' OR 'cognitive' OR 'HRQOL' OR 'functional outcome' OR 'functional outcomes' OR 'pediatric stroke outcome measures' OR 'Glasgow Outcome Score' OR 'GOS' OR 'extracorporeal life support' OR ('waiting lists' AND 'heart transplantation'/exp) OR 'extracorporeal oxygenation'/exp OR 'extracorporeal membrane oxygenation' OR 'ECMO' OR 'mechanical circulatory support' OR 'left ventricular assist device' OR 'LVAD' OR 'ventilator free' OR 'VFD' OR 'inotrope dependency' OR 'mechanical support' OR 'seizure'/exp OR 'seizure' OR 'seizures' OR 'pedNIHSS' OR 'pediatric NIH Stroke Scale' OR 'neurologic disability' OR 'neurological disability')

AND

('predictive value'/exp OR 'sensitivity and specificity'/exp OR 'False Negative result'/exp OR 'False Positive result'/exp OR 'specificity' OR 'false negative' OR 'false positive' OR 'predict' OR 'predicting' OR 'predictive' OR 'prediction' OR 'predictor' OR 'accurate' OR 'accuracy' OR 'precision' OR 'precise' OR 'validity' OR 'reliability' OR 'discrimination' OR 'calibration' OR 'sensitivity to change' OR 'goodness of fit')

NOT ('editorial'/it OR 'letter'/it OR 'note'/it OR 'review'/it OR 'chapter'/it OR 'conference abstract'/it)

Searched 12/13/2017, 6828 results

Searched 1/6/2020, 1957 results

### Coagulation dysfunction

12/13/17 search  
 Total references: 4942  
 Duplicate references: 966  
 Unique references for import to Covidence: 3976  
 Covidence removed duplicates: 10  
 References for title/abstract screening: 3966

1/6/2020 update (2017-2020)  
 Total references: 1255  
 Duplicate references: 214  
 Unique references for import to Covidence: 1041  
 Covidence removed duplicates: 266  
 References for title/abstract screening: 775

**Pubmed:**

("blood coagulation disorders"[mh] OR "blood coagulation disorders"[tw] OR "blood coagulation disorder"[tw] OR "activated protein c resistance"[mh] OR "activated protein c resistance"[tw] OR "afibrinogenemia"[mh] OR "afibrinogenemia"[tw] OR "hypofibrinogenemia"[tw] OR "antithrombin III deficiency"[mh] OR "antithrombin III deficiency"[tw] OR "Bernard-soulier syndrome"[mh] OR "Bernard-soulier syndrome"[tw] OR "factor V deficiency"[mh] OR "factor V deficiency"[tw] OR "factor VII deficiency"[mh] OR "factor VII deficiency"[tw] OR "Factor X deficiency"[mh] OR "Factor X deficiency"[tw] OR "Factor XI deficiency"[mh] OR "Factor XI deficiency"[tw] OR "Factor XII deficiency"[mh] OR "Factor XII deficiency"[tw] OR "Factor XIII deficiency"[mh] OR "Factor XIII deficiency"[tw] OR "hemophilia A"[mh] OR "Hemophilia"[tw] OR "Hemophilia B"[mh] OR "hermanski-pudlak syndrome"[mh] OR "hermanski-pudlak syndrome"[tw] OR "ocular albinism"[tw] OR "hypoprothrombinemias"[mh] OR "hypoprothrombinemias"[tw] OR "protein c deficiency"[mh] OR "protein c deficiency"[tw] OR "thrombasthenia"[mh] OR "thrombasthenia"[tw] OR "Glanzmann disease"[tw] OR "von willebrand diseases"[mh] OR "von willebrand"[tw] OR "wiskott-aldrich syndrome"[mh] OR "wiskott-aldrich syndrome"[tw] OR "coagulation protein disorders"[mh] OR "coagulation protein disorder"[tw] OR "coagulation protein disorders"[tw] OR "disseminated intravascular disorder"[tw] OR "disseminated intravascular disorders"[tw] OR "disseminated intravascular coagulation"[tw] OR "ecchymosis"[mh] OR "ecchymosis"[tw] OR "platelet storage pool deficiency"[mh] OR "platelet storage pool deficiency"[tw] OR "protein s deficiency"[mh] OR "protein s deficiency"[tw] OR "purpura"[mh] OR "purpura"[tw] OR "waterhouse-friderichsen syndrome"[mh] OR "waterhouse-friderichsen syndrome"[tw] OR "epidemic meningitis"[tw] OR "Thrombocytopenia, Essential"[mh] OR "essential thrombocytopenia"[tw] OR "vitamin k deficiency"[mh] OR "vitamin k deficiency"[tw] OR "coagulopathy"[tw] OR "coagulopathies"[tw] OR "coagulation disorder"[tw] OR "coagulation disorders"[tw] OR "clotting disorder"[tw] OR "clotting disorders"[tw] OR "Blood coagulation tests"[mh] OR "blood coagulation test"[tw] OR "blood coagulation tests"[tw] OR "International Normalized Ratio"[mh] OR "International Normalized Ratio"[tw] OR "INR"[tw] OR "Partial thromboplastin time"[mh] OR "partial thromboplastin time"[tw] OR "prothrombin time"[mh] OR "prothrombin time"[tw] OR "thrombelastography"[mh] OR "thrombelastography"[tw] OR "thromboelastography"[tw] OR "Thrombin time"[mh] OR "thrombin time"[tw] OR "thrombin clotting time"[tw] OR "whole blood coagulation time"[mh] OR "whole blood coagulation time"[tw] OR "coagulation time"[tw] OR "activated clotting time"[tw] OR "platelet count"[mh] OR "platelet count"[tw] OR "platelet counts"[tw] OR "platelet dysfunction"[tw] OR "Protein C"[mh] OR "protein c"[tw] OR "endogenous thrombin potential"[tw] OR "hyperfibrinolysis"[tw] OR "Tissue Plasminogen Activator"[mh] OR "tissue plasminogen activator"[tw] OR "tPA"[tw] OR "urokinase-type plasminogen activator"[mh] OR "urokinase-type plasminogen activator"[tw] OR "uPA"[tw] OR "Factor XII"[mh] OR "factor XII"[tw] OR "factor 12"[tw] OR "factor twelve"[tw] OR "FXII"[tw] OR "Factor XIIa"[mh] OR "Factor XIIa"[tw] OR "FXIIa"[tw] OR "factor twelve a"[tw] OR "factor 12a"[tw] OR "blood coagulation factors"[mh] OR "coagulation factors"[tw] OR "coagulation factor"[tw] OR "clotting factor"[tw] OR "clotting factors"[tw] OR "plasminogen inactivators"[mh] OR "plasminogen inactivator"[tw] OR "plasminogen inactivators"[tw] OR "plasminogen activator inhibitor"[tw] OR "plasminogen activator inhibitors"[tw] OR "PAI"[tiab] OR "Antifibrinolytic Agents"[mh] OR "antifibrinolytic agents"[tw] OR "antifibrinolytic agent"[tw] OR "plasmin inhibitor"[tw] OR "plasmin inhibitors"[tw] OR "alpha-2-antiplasmin"[mh] OR "alpha-2-antiplasmin"[tw] OR "Carboxypeptidase B2"[mh] OR "carboxypeptidase B2"[tw] OR "thrombin-activatable fibrinolysis inhibitor"[tw] OR "TAFI"[tw] OR "Japanese Association of Acute Medicine DIC"[tw] OR "international society on thrombosis and hemostasis DIC"[tw] OR "Heparin"[mh] OR "heparin"[tw] OR "heparin, low-molecular-weight"[mh] OR "low-molecular-weight heparin"[tw] OR "LMWH"[tw] OR "thrombomodulin"[mh] OR "thrombomodulin"[tw] OR "protease inhibitors"[mh] OR "protease inhibitors"[tw] OR "protease inhibitor"[tw] OR "angiotensin-converting enzyme inhibitors"[mh] OR "angiotensin-converting enzyme inhibitors"[tw] OR "angiotensin-converting enzyme inhibitor"[tw] OR "vasopeptidase inhibitors"[mh] OR "vasopeptidase inhibitors"[tw] OR "vasopeptidase inhibitor"[tw] OR "cysteine proteinase inhibitors"[mh] OR "cysteine proteinase inhibitors"[tw] OR "cysteine proteinase inhibitor"[tw] OR "caspase inhibitor"[mh] OR "caspase inhibitor"[tw] OR "caspase inhibitors"[tw] OR "dipeptidyl-peptidase IV inhibitors"[mh] OR "dipeptidyl-peptidase IV inhibitor"[tw] OR "dipeptidyl-peptidase IV inhibitors"[tw] OR "HIV Protease inhibitors"[mh] OR "Matrix metalloproteinase inhibitors"[mh] OR "Matrix metalloproteinase inhibitors"[tw] OR "matrix metalloproteinase inhibitor"[tw] OR "Proteasome inhibitors"[mh] OR "proteasome inhibitors"[tw] OR "proteasome inhibitor"[tw] OR "serine proteinase inhibitors"[mh] OR "serine proteinase inhibitors"[tw] OR "serine proteinase inhibitor"[tw] OR "antithrombins"[mh] OR "antithrombins"[tw] OR "antithrombin"[tw] OR "factor Xa inhibitors"[mh] OR "factor Xa inhibitor"[tw] OR "factor Xa inhibitors"[tw] OR "factor ten a



inhibitor"[tw] OR "factor ten a inhibitors"[tw] OR "factor 10a inhibitor"[tw] OR "factor 10a inhibitors"[tw] OR "serine peptidase inhibitors, Kazal Type"[mh] OR "serine peptidase inhibitors"[tw] OR "serine peptidase inhibitor"[tw] OR "serpins"[mh] OR "serpins"[tw] OR "serpin"[tw] OR "trypsin inhibitors"[mh] OR "trypsin inhibitors"[tw] OR "trypsin inhibitor"[tw] OR "fibrin fibrinogen degradation products"[mh] OR "fibrin fibrinogen degradation product"[tw] OR "fibrin fibrinogen degradation products"[tw] OR "Fibrin degradation product"[tw] OR "fibrin degradation products"[tw] OR "fibrinogen"[mh] OR "fibrinogen"[tw] OR "fibrinogenemia"[tw] OR "hyperfibrinogenemia"[tw] OR "antithrombins"[mh] OR "antithrombins"[tw] OR "antithrombin"[tw] OR "thromboelastogram"[tw] OR "thromboelastograms"[tw] OR "TEG"[tw] OR "rotational thromboelastometry"[tw] OR "ROTEM"[tw] OR "ROTEG"[tw] OR "fibrin fragment d"[nm] OR "fibrin fragment d"[tw] OR "d dimer"[tw] OR "d dimers"[tw] OR "platelet aggregometry"[tw] OR "ADAMTS13 Protein"[mh] OR "ADAMTS13 protein"[tw] OR "von Willebrand factor-cleaving protease"[tw] OR "vWF-Cleaving protease"[tw] OR "VWFPCP"[tw])

AND

("Child"[mh] OR "Infant"[mh:noexp] OR "Infant, Newborn"[mh:noexp] OR "infant, low birth weight"[mh] OR "infant, postmature"[mh] OR "Adolescent"[mh] OR "Child, Preschool"[mh] OR "child"[tiab] OR "infant"[all] OR "adolescent"[all] OR "children"[all] OR "infants"[all] OR "adolescents"[all] OR "pediatric patient"[all] OR "pediatric patients"[all] OR "adolescence"[all] OR "youth"[all] OR "youths"[all] OR "juvenile"[all] OR "childhood"[all] OR "teenager"[all] OR "teenagers"[all] OR "teen"[all] OR "teens"[all] OR "preschool child"[all] OR "neonate"[all] OR "newborn"[all] OR "baby"[all] OR "babies"[all] OR "pediatric"[tiab] OR "pediatrics"[tiab] OR "paediatric"[tiab] OR "paediatrics"[tiab] OR "toddler"[all] OR "toddlers"[all])

AND

("Patient Outcome Assessment"[mh] OR "Critical Care Outcomes"[mh] OR "mortality"[mh] OR "length of stay"[mh] OR "quality of life"[mh] OR "outcome"[tw] OR "mortality"[tw] OR "length of stay"[tw] OR "LOS"[tw] OR "quality of life"[tw] OR "PedsQL"[tw] OR "functional morbidity"[tw] OR "PCPC"[tw] OR "pediatric cerebral performance category"[tw] OR "POPC"[tw] OR "pediatric overall performance category"[tw] OR "FSS"[tw] OR "functional status scale"[tw] OR "WeeFIM"[tw] OR "PEDI"[tw] OR ("pediatric evaluation" AND "disability inventory") OR "MSEL"[tw] OR "mullen scales"[tw] OR "WISC"[tiab] OR "wechsler intelligence scale"[tw] OR "BSID"[tw] OR "bayley scales"[tw] OR "VABS"[tw] OR "vineland adaptive behavior scale"[tw] OR "Depression/diagnosis"[mh] OR "depression"[tiab] OR "PTSD"[tw] OR "post-traumatic stress disorder"[tw] OR "post-traumatic stress"[tw] OR "Stress Disorders, Post-Traumatic"[mh] OR "Stress Disorders, Traumatic, Acute"[mh] OR "acute stress disorder"[tw] OR "acute traumatic stress disorder"[tw] OR "tracheostomy"[mh] OR "tracheostomy"[tw] OR "Gastrostomy"[mh] OR "gastrostomy"[tw] OR "gastric tube"[tw] OR "NPMODS"[tw] OR "progressive multiple organ dysfunction"[tw] OR "organ dysfunction resolution"[tw] OR "cost of medical care"[tw] OR "health care costs"[mh] OR "symptom improvement"[tw] OR "duration of life"[tw] OR "quality of dying"[tw] OR "quality of death"[tw] OR "Quality-adjusted life years"[mh] OR "neurocognitive"[tw] OR "neuro-cognitive"[tw] OR "neuro cognitive"[tw] OR "neurocognition"[tw] OR "neurodevelopmental"[tw] OR "neuro-developmental"[tw] OR "neuro developmental"[tw] OR "neurodevelopment"[tw] OR "neuro-development"[tw] OR "neuro development"[tw] OR "neurologic"[tw] OR "neurological"[tw] OR "cognitive"[tw] OR "HRQOL"[tw] OR "functional outcome"[tw] OR "functional outcomes"[tw] OR "pediatric stroke outcome measures"[tw] OR "Glasgow Outcome Score"[tw] OR "GOS"[tw] OR "extracorporeal life support"[tw] OR ("waiting lists"[mh] AND "heart transplantation"[mh]) OR "extracorporeal membrane oxygenation"[mh] OR "extracorporeal membrane oxygenation"[tw] OR "ECMO"[tw] OR "mechanical circulatory support"[tw] OR "left ventricular assist device"[tw] OR "LVAD"[tw] OR "ventilator free"[tw] OR "VFD"[tw] OR "inotrope dependency"[tw] OR "mechanical support"[tw] OR "seizures"[mh] OR "seizure"[tw] OR "seizures"[tw] OR "pedNiHSS"[tw] OR "pediatric NIH Stroke Scale"[tw] OR "neurologic disability"[tw] OR "neurological disability"[tw])

AND

("predictive value of tests"[mh] OR "sensitivity and specificity"[mh] OR "False Negative Reactions"[mh] OR "False Positive Reactions"[mh] OR "specificity"[tw] OR "false negative"[tw] OR "false positive"[tw] OR "predict"[tw] OR "predicting"[tw] OR "predictive"[tw] OR "prediction"[tw] OR "predictor"[tw] OR "accurate"[tw] OR "accuracy"[tw] OR "precision"[tw] OR "precise"[tw] OR "validity"[tw] OR "reliability"[tw] OR "discrimination"[tw] OR "calibration"[tw] OR "sensitivity to change"[tw] OR "goodness of fit") NOT ("editorial"[pt] OR "guideline"[pt] OR "letter"[pt] OR "review"[pt] OR "meta-analysis"[pt])

Searched 12/13/2017, 2087 results

**Embase:**

('blood clotting disorder'/exp OR 'blood coagulation disorders':ti,ab OR 'blood coagulation disorder':ti,ab OR 'activated protein c resistance'/exp OR 'activated protein c resistance':ti,ab OR 'afibrinogenemia'/exp OR 'afibrinogenemia':ti,ab OR 'hypofibrinogenemia':TI,AB OR 'antithrombin deficiency'/exp OR 'antithrombin III deficiency':ti,ab OR 'Bernard soulier disease'/exp OR 'Bernard-soulier syndrome':ti,ab OR 'blood clotting factor 5 deficiency'/exp OR 'factor V deficiency':ti,ab OR 'blood clotting factor 7 deficiency'/exp OR 'factor VII deficiency':ti,ab OR 'blood clotting Factor 10 deficiency'/exp OR 'Factor X deficiency':ti,ab OR 'blood clotting Factor 11 deficiency'/exp OR 'Factor XI deficiency':ti,ab OR 'blood clotting Factor 12 deficiency'/exp OR 'Factor XII deficiency':ti,ab OR 'blood clotting Factor 13 deficiency'/exp OR 'Factor XIII deficiency':ti,ab OR 'hemophilia A'/exp OR 'Hemophilia':ti,ab OR 'Hemophilia B'/exp OR 'ocular albinism'/exp OR 'hermanski-pudlak syndrome':ti,ab OR 'ocular albinism':ti,ab OR 'hypoprothrombinemia'/exp OR 'hypoprothrombinemias':ti,ab OR 'protein c deficiency'/exp OR 'protein c deficiency':ti,ab OR 'Glanzmann disease'/exp OR 'thrombasthenia':ti,ab OR 'von willebrand disease'/exp OR 'von willebrand':ti,ab OR 'wiskott aldrich syndrome'/exp OR 'wiskott-aldrich syndrome':ti,ab OR 'coagulation protein disorder':ti,ab OR 'coagulation protein disorders':ti,ab OR 'disseminated intravascular disorder':ti,ab OR 'disseminated intravascular disorders':ti,ab OR 'disseminated intravascular coagulation':ti,ab OR 'ecchymosis'/exp OR 'ecchymosis':ti,ab OR 'thrombocyte disorder'/exp OR 'platelet storage pool deficiency':ti,ab OR 'protein s deficiency'/exp OR 'protein s deficiency':ti,ab OR 'purpura'/exp OR 'purpura':ti,ab OR 'epidemic meningitis'/exp OR 'waterhouse-friderichsen syndrome':ti,ab OR 'thrombotic thrombocytopenic purpura'/exp OR 'essential thrombocythemia':ti,ab OR 'vitamin k deficiency'/exp OR 'vitamin k deficiency':ti,ab OR 'coagulopathy':TI,AB OR 'coagulopathies':TI,AB OR 'coagulation disorder':TI,AB OR 'coagulation disorders':TI,AB OR 'clotting disorder':TI,AB OR 'clotting disorders':TI,AB OR 'Blood clotting test'/exp OR 'blood coagulation test':TI,AB OR 'blood coagulation tests':TI,AB OR 'International Normalized Ratio'/exp OR 'International Normalized Ratio':TI,AB OR 'INR':TI,AB OR 'Partial thromboplastin time'/exp OR 'partial thromboplastin time':TI,AB OR 'prothrombin time'/exp OR 'prothrombin time':TI,AB OR 'thromboelastography'/exp OR 'thrombelastography':TI,AB OR 'thromboelastography':TI,AB OR 'Thrombin time'/exp OR 'thrombin time':TI,AB OR 'thrombin clotting time':TI,AB OR 'blood clotting time'/exp OR 'whole blood coagulation time':TI,AB OR 'coagulation time':TI,AB OR 'activated clotting time':TI,AB OR 'thrombocyte count'/exp OR 'platelet count':TI,AB OR 'platelet counts':TI,AB OR 'platelet dysfunction':TI,AB OR 'Protein C'/exp OR 'protein c':TI,AB OR 'endogenous thrombin potential':TI,AB OR 'hyperfibrinolysis':TI,AB OR 'Tissue Plasminogen Activator'/exp OR 'tissue plasminogen activator':TI,AB OR 'tPA':TI,AB OR 'urokinase'/exp OR 'urokinase-type plasminogen activator':TI,AB OR 'uPA':TI,AB OR 'blood clotting Factor 12'/exp OR 'factor XII':TI,AB OR 'factor 12':TI,AB OR 'factor twelve':TI,AB OR 'FXII':TI,AB OR 'blood clotting Factor 12a'/exp OR 'Factor XIIa':TI,AB OR 'FXIIa':TI,AB OR 'factor twelve a':TI,AB OR 'factor 12a':TI,AB OR 'blood clotting factor'/exp OR 'coagulation factors':TI,AB OR 'coagulation factor':TI,AB OR 'clotting factor':TI,AB OR 'clotting factors':TI,AB OR 'plasminogen inactivator':TI,AB OR 'plasminogen inactivators':TI,AB OR 'plasminogen activator inhibitor'/exp OR 'plasminogen activator inhibitor':TI,AB OR 'plasminogen activator inhibitors':TI,AB OR 'PAI':TI,AB OR 'antifibolytic agents':TI,AB OR 'antifibolytic agent':TI,AB OR 'plasmin inhibitor':TI,AB OR 'plasmin inhibitors':TI,AB OR 'alpha 2 antiplasmin'/exp OR 'alpha-2-antiplasmin':TI,AB OR 'thrombin activatable fibrinolysis inhibitor'/exp OR 'carboxypeptidase B2':TI,AB OR 'thrombin-activatable fibrinolysis inhibitor':TI,AB OR 'TAFI':TI,AB OR 'Japanese Association of Acute Medicine DIC':TI,AB OR 'international society on thrombosis and hemostasis DIC':TI,AB OR 'Heparin'/exp OR 'heparin':TI,AB OR 'low molecular weight heparin'/exp OR 'low-molecular-weight heparin':TI,AB OR 'LMWH':TI,AB OR 'thrombomodulin'/exp OR 'thrombomodulin':TI,AB OR 'proteinase inhibitor'/exp OR 'protease inhibitors':TI,AB OR 'protease inhibitor':TI,AB OR 'dipeptidyl carboxypeptidase inhibitor'/exp OR 'angiotensin-converting enzyme inhibitors':TI,AB OR 'angiotensin-converting enzyme inhibitor':TI,AB OR 'vasopeptidase inhibitor'/exp OR 'vasopeptidase inhibitors':TI,AB OR 'vasopeptidase inhibitor':TI,AB OR 'cysteine proteinase inhibitor'/exp OR 'cysteine proteinase inhibitors':TI,AB OR 'cysteine proteinase inhibitor':TI,AB OR 'caspase inhibitor'/exp OR 'caspase inhibitor':TI,AB OR 'caspase inhibitors':TI,AB OR 'dipeptidyl peptidase IV inhibitor'/exp OR 'dipeptidyl-peptidase IV inhibitor':TI,AB OR 'dipeptidyl-peptidase IV inhibitors':TI,AB OR 'human immunodeficiency virus proteinase inhibitor'/exp OR 'Matrix metalloproteinase inhibitor'/exp OR 'Matrix metalloproteinase inhibitors':TI,AB OR 'matrix

metalloproteinase inhibitor':TI,AB OR 'Proteasome inhibitor'/exp OR 'proteasome inhibitors':TI,AB OR 'proteasome inhibitor':TI,AB OR 'serine proteinase inhibitor'/exp OR 'serine proteinase inhibitors':TI,AB OR 'serine proteinase inhibitor':TI,AB OR 'antithrombin'/exp OR 'antithrombins':TI,AB OR 'antithrombin':TI,AB OR 'blood clotting factor 10a inhibitor'/exp OR 'factor Xa inhibitor':TI,AB OR 'factor Xa inhibitors':TI,AB OR 'factor ten a inhibitor':TI,AB OR 'factor ten a inhibitors':TI,AB OR 'factor 10a inhibitor':TI,AB OR 'factor 10a inhibitors':TI,AB OR 'serine peptidase inhibitors':TI,AB OR 'serine peptidase inhibitor':TI,AB OR 'serpins':TI,AB OR 'serpin':TI,AB OR 'trypsin inhibitor'/exp OR 'trypsin inhibitors':TI,AB OR 'trypsin inhibitor':TI,AB OR 'fibrin degradation product'/exp OR 'fibrin fibrinogen degradation product':TI,AB OR 'fibrin fibrinogen degradation products':TI,AB OR 'Fibrin degradation product':TI,AB OR 'fibrin degradation products':TI,AB OR 'fibrinogen'/exp OR 'fibrinogen':TI,AB OR 'fibrinogenemia':TI,AB OR 'hyperfibrinogenemia':TI,AB OR 'antithrombin'/exp OR 'antithrombins':TI,AB OR 'antithrombin':TI,AB OR 'thromboelastogram':TI,AB OR 'thromboelastograms':TI,AB OR 'TEG':TI,AB OR 'rotational thromboelastometry':TI,AB OR 'ROTEM':TI,AB OR 'ROTEG':TI,AB OR 'fibrin fragment d':TI,AB OR 'd dimer':TI,AB OR 'd dimers':TI,AB OR 'platelet aggregometry':TI,AB OR 'von willebrand factor cleaving proteinase'/exp OR 'ADAMTS13 protein':TI,AB OR 'von Willebrand factor-cleaving protease':TI,AB OR 'vWF-Cleaving protease':TI,AB OR 'VWFCP')

AND

('Child'/de OR 'Infant'/de OR 'Adolescent'/de OR 'preschool child'/exp OR 'child':ti,ab OR 'infant':ti,ab OR 'adolescent':TI,AB OR 'children':TI,AB OR 'infants':TI,AB OR 'adolescents':TI,AB OR 'pediatric patient':TI,AB OR 'pediatric patients':TI,AB OR 'adolescence':TI,AB OR 'youth':TI,AB OR 'youths':TI,AB OR 'juvenile'/exp OR 'juvenile':TI,AB OR 'childhood':TI,AB OR 'teenager':TI,AB OR 'teenagers':TI,AB OR 'teen':TI,AB OR 'teens':TI,AB OR 'preschool child':TI,AB OR 'neonate':TI,AB OR 'newborn'/de OR 'newborn':ti,ab OR 'baby':TI,AB OR 'babies':TI,AB OR 'pediatric':ti,ab OR 'pediatrics':ti,ab OR 'paediatric':ti,ab OR 'paediatrics':ti,ab OR 'toddler'/exp OR 'toddler':TI,AB OR 'toddlers')

AND

('Outcome Assessment'/exp OR 'Critical Care Outcome'/exp OR 'mortality'/exp OR 'length of stay'/exp OR 'quality of life'/exp OR 'outcome':TI,AB OR 'mortality':TI,AB OR 'length of stay':TI,AB OR 'LOS':TI,AB OR 'quality of life':TI,AB OR 'PedsQL':TI,AB OR 'functional morbidity':TI,AB OR 'PCPC':TI,AB OR 'pediatric cerebral performance category':TI,AB OR 'POPC':TI,AB OR 'pediatric overall performance category':TI,AB OR 'FSS':TI,AB OR 'functional status scale':TI,AB OR 'WeeFIM':TI,AB OR 'PEDI':TI,AB OR ('pediatric evaluation' AND 'disability inventory') OR 'MSEL':TI,AB OR 'mullen scales':TI,AB OR 'WISC':ti,ab OR 'wechsler intelligence scale':TI,AB OR 'BSID':TI,AB OR 'bayley scales':TI,AB OR 'VABS':TI,AB OR 'vineland adaptive behavior scale':TI,AB OR 'Depression assessment'/exp OR 'depression':ti,ab OR 'PTSD':TI,AB OR 'post-traumatic stress disorder':TI,AB OR 'post-traumatic stress':TI,AB OR 'posttraumatic stress disorder'/exp OR 'acute stress disorder'/exp OR 'acute stress disorder':TI,AB OR 'acute traumatic stress disorder':TI,AB OR 'tracheostomy'/exp OR 'tracheostomy':TI,AB OR 'Gastrostomy'/exp OR 'gastrostomy':TI,AB OR 'stomach tube'/exp OR 'gastric tube':TI,AB OR 'NPMODS':TI,AB OR 'progressive multiple organ dysfunction':TI,AB OR 'organ dysfunction resolution':TI,AB OR 'cost of medical care':TI,AB OR 'health care costs'/exp OR 'symptom improvement':TI,AB OR 'duration of life':TI,AB OR 'quality of dying':TI,AB OR 'quality of death':TI,AB OR 'Quality adjusted life year'/exp OR 'neurocognitive':TI,AB OR 'neuro-cognitive':TI,AB OR 'neuro cognitive':TI,AB OR 'neurocognition':TI,AB OR 'neurodevelopmental':TI,AB OR 'neuro-developmental':TI,AB OR 'neuro developmental':TI,AB OR 'neurodevelopment':TI,AB OR 'neuro-development':TI,AB OR 'neuro development':TI,AB OR 'neurologic':TI,AB OR 'neurological':TI,AB OR 'cognitive':TI,AB OR 'HRQOL':TI,AB OR 'functional outcome':TI,AB OR 'functional outcomes':TI,AB OR 'pediatric stroke outcome measures':TI,AB OR 'Glasgow Outcome Score':TI,AB OR 'GOS':TI,AB OR 'extracorporeal life support':TI,AB OR ('waiting lists' AND 'heart transplantation'/exp) OR 'extracorporeal oxygenation'/exp OR 'extracorporeal membrane oxygenation':TI,AB OR 'ECMO':TI,AB OR 'mechanical circulatory support':TI,AB OR 'left ventricular assist device':TI,AB OR 'LVAD':TI,AB OR 'ventilator free':TI,AB OR 'VFD':TI,AB OR 'inotrope dependency':TI,AB OR 'mechanical support':TI,AB OR 'seizure'/exp OR 'seizure':TI,AB OR 'seizures':TI,AB OR 'pedNiHSS':TI,AB OR 'pediatric NIH Stroke Scale':TI,AB OR 'neurologic disability':TI,AB OR 'neurological disability')

AND

('predictive value'/exp OR 'sensitivity and specificity'/exp OR 'False Negative result'/exp OR 'False Positive result'/exp OR 'specificity':TI,AB OR 'false negative':TI,AB OR 'false positive':TI,AB OR 'predict':TI,AB OR

'predicting':TI,AB OR 'predictive':TI,AB OR 'prediction':TI,AB OR 'predictor':TI,AB OR 'accurate':TI,AB OR 'accuracy':TI,AB OR 'precision':TI,AB OR 'precise':TI,AB OR 'validity':TI,AB OR 'reliability':TI,AB OR 'discrimination':TI,AB OR 'calibration':TI,AB OR 'sensitivity to change':TI,AB OR 'goodness of fit')  
 NOT ('editorial'/it OR 'letter'/it OR 'note'/it OR 'review'/it OR 'chapter'/it OR 'conference abstract'/it)  
 Searched 12/13/2017, 2855 results  
 Searched 1/6/2020, 824 results

### Endocrine dysfunction

12/19/17 search  
 Total references: 7299  
 Duplicate references: 1382  
 Unique references for Covidence import: 5917  
 Covidence deduped references: 18  
 References for title/abstract screening: 5899

1/6/20 update (2017-2020)  
 Total references: 1801  
 Duplicate references: 338  
 Unique references for Covidence import: 1463  
 Covidence deduped references: 386  
 References for title/abstract screening: 1077

#### Pubmed:

("endocrine dysfunction"[tw] OR "cortisol"[tw] OR "Adrenal Cortex hormones"[mh] OR "adrenal cortex hormones"[tw] OR "adrenal cortex hormone"[tw] OR "corticosteroid"[tw] OR "corticosteroids"[tw] OR "glucose"[mh] OR "glucose"[tw] OR "blood glucose"[mh] OR "blood sugar"[tw] OR "glycemia"[tw] OR "hyperglycemia"[mh] OR "hyperglycemia"[tw] OR "hyperglycemic"[tw] OR "thyroxine"[mh] OR "thyroxine"[tw] OR "thyroxin"[tw] OR "triiodothyronine"[mh] OR "triiodothyronine"[tw] OR "liothyronine"[tw] OR ("T3"[tw] OR "T4"[tw]) AND ("thyroid")) OR "hypothyroidism"[mh] OR "hypothyroidism"[tw] OR "TSH deficiency"[tw] OR "hyperthyroidism"[mh:noexp] OR "hyperthyroidism"[tw] OR "hyperthyroid"[tw] OR "thyrotropin"[mh] OR "thyrotropin"[tw] OR "thyroid stimulating hormone"[tw] OR "TSH"[tw] OR "adrenocorticotrophic hormone"[mh] OR "adrenocorticotrophic hormone"[tw] OR "adrenocorticotropin"[tw] OR "corticotropin"[tw] OR "ACTH"[tw])  
 AND

("Child"[mh] OR "Infant"[mh:noexp] OR "Infant, Newborn"[mh:noexp] OR "infant, low birth weight"[mh] OR "infant, postmature"[mh] OR "Adolescent"[mh] OR "Child, Preschool"[mh] OR "child"[tiab] OR "infant"[all] OR "adolescent"[all] OR "children"[all] OR "infants"[all] OR "adolescents"[all] OR "pediatric patient"[all] OR "pediatric patients"[all] OR "adolescence"[all] OR "youth"[all] OR "youths"[all] OR "juvenile"[all] OR "childhood"[all] OR "teenager"[all] OR "teenagers"[all] OR "teen"[all] OR "teens"[all] OR "preschool child"[all] OR "neonate"[all] OR "newborn"[all] OR "baby"[all] OR "babies"[all] OR "pediatric"[tiab] OR "pediatrics"[tiab] OR "paediatric"[tiab] OR "paediatrics"[tiab] OR "toddler"[all] OR "toddlers"[all])  
 AND

("Patient Outcome Assessment"[mh] OR "Critical Care Outcomes"[mh] OR "mortality"[mh] OR "length of stay"[mh] OR "quality of life"[mh] OR "outcome"[tw] OR "mortality"[tw] OR "length of stay"[tw] OR "LOS"[tw] OR "quality of life"[tw] OR "PedsQL"[tw] OR "functional morbidity"[tw] OR "PCPC"[tw] OR "pediatric cerebral performance category"[tw] OR "POPC"[tw] OR "pediatric overall performance category"[tw] OR "FSS"[tw] OR "functional status scale"[tw] OR "WeeFIM"[tw] OR "PEDI"[tw] OR ("pediatric evaluation" AND "disability inventory") OR "MSEL"[tw] OR "mullen scales"[tw] OR "WISC"[tiab] OR "wechsler intelligence scale"[tw] OR "BSID"[tw] OR "bayley scales"[tw] OR "VABS"[tw] OR "vineland adaptive behavior scale"[tw] OR "Depression/diagnosis"[mh] OR "depression"[tiab] OR "PTSD"[tw] OR "post-traumatic stress disorder"[tw] OR "post-traumatic stress"[tw] OR "Stress Disorders, Post-Traumatic"[mh] OR "Stress Disorders, Traumatic, Acute"[mh] OR "acute stress disorder"[tw] OR "acute traumatic stress disorder"[tw] OR "tracheostomy"[mh] OR "tracheostomy"[tw] OR "Gastrostomy"[mh] OR "gastrostomy"[tw] OR "gastric tube"[tw] OR "NPMODS"[tw] OR "progressive multiple organ dysfunction"[tw] OR "organ dysfunction resolution"[tw] OR "cost of medical care"[tw] OR "health care costs"[mh] OR "symptom improvement"[tw] OR "duration of life"[tw] OR "quality of dying"[tw] OR "quality of death"[tw] OR "Quality-adjusted life years"[mh] OR "neurocognitive"[tw] OR "neuro-cognitive"[tw] OR "neuro cognitive"[tw] OR "neurocognition"[tw] OR "neurodevelopmental"[tw] OR "neuro-developmental"[tw] OR "neuro developmental"[tw] OR "neurodevelopment"[tw] OR "neuro-development"[tw] OR "neuro development"[tw] OR "neurologic"[tw] OR "neurological"[tw] OR "cognitive"[tw] OR "HRQOL"[tw] OR "functional outcome"[tw] OR "functional outcomes"[tw] OR "pediatric stroke outcome measures"[tw] OR "Glasgow Outcome Score"[tw] OR "GOS"[tw] OR "extracorporeal life support"[tw] OR ("waiting lists"[mh] AND "heart transplantation"[mh]) OR

"extracorporeal membrane oxygenation"[mh] OR "extracorporeal membrane oxygenation"[tw] OR "ECMO"[tw] OR "mechanical circulatory support"[tw] OR "left ventricular assist device"[tw] OR "LVAD"[tw] OR "ventilator free"[tw] OR "VFD"[tw] OR "inotrope dependency"[tw] OR "mechanical support"[tw] OR "seizures"[mh] OR "seizure"[tw] OR "seizures"[tw] OR "pedNIHSS"[tw] OR "pediatric NIH Stroke Scale"[tw] OR "neurologic disability"[tw] OR "neurological disability"[tw])

AND

("predictive value of tests"[mh] OR "sensitivity and specificity"[mh] OR "False Negative Reactions"[mh] OR "False Positive Reactions"[mh] OR "specificity" OR "false negative" OR "false positive" OR "predict" OR "predicting" OR "predictive" OR "prediction" OR "predictor" OR "accurate" OR "accuracy" OR "precision" OR "precise" OR "validity" OR "reliability" OR "discrimination" OR "calibration" OR "sensitivity to change" OR "goodness of fit")

NOT ("editorial"[pt] OR "guideline"[pt] OR "letter"[pt] OR "review"[pt] OR "meta-analysis"[pt] OR "Thyroid Neoplasms"[mh] OR "congenital hyperinsulinism"[mh] OR "congenital hypothyroidism"[mh] OR "thyroid nodule"[mh] OR "inhaled corticosteroids"[tiab] OR "asthma"[mh] OR "Diabetes Mellitus, Type 2"[mh] OR "topical corticosteroids"[tw] OR "antenatal corticosteroids"[tw] OR "intraarticular corticosteroid injections"[tw] OR "transtympanic steroid injection"[tw] OR "ultrasound-guided corticosteroid injection"[tw] OR "prenatal steroids"[tw] OR "intralesional steroids"[tw] OR "steriod ointment"[tw] OR "nasal steroids"[tw] OR "dental corticosteroids"[tw] OR "maternal thyroid"[tw] OR "primary hypothyroidism"[tw] OR "primary hyperthyroidism"[tw])

Searched 12/19/2017, 2501 results

Searched 1/6/2020, 568 results

#### **Embase:**

('endocrine dysfunction':ti,ab OR 'cortisol':ti,ab OR 'corticosteroid'/exp OR 'adrenal cortex hormones':ti,ab OR 'adrenal cortex hormone':ti,ab OR 'corticosteroid':ti,ab OR 'corticosteroids':ti,ab OR 'glucose'/exp OR 'glucose':ti,ab OR 'glucose blood level'/exp OR 'blood sugar':ti,ab OR 'glycemia':ti,ab OR 'hyperglycemia'/exp OR 'hyperglycemia':ti,ab OR 'hyperglycemic':ti,ab OR 'thyroxine'/exp OR 'thyroxine':ti,ab OR 'thyroxin':ti,ab OR 'liothyronine'/exp OR 'liothyronine':ti,ab OR 'triiodothyronine':ti,ab OR (('T3':ti,ab OR 'T4':ti,ab) AND ('thyroid':ti,ab)) OR 'hypothyroidism'/de OR 'hypothyroidism':ti,ab OR 'TSH deficiency':ti,ab OR 'hyperthyroidism'/de OR 'hyperthyroidism':ti,ab OR 'hyperthyroid':ti,ab OR 'thyrotropin'/exp OR 'thyrotropin':ti,ab OR 'thyroid stimulating hormone':ti,ab OR 'TSH':ti,ab OR 'corticotropin'/exp OR 'adrenocorticotrophic hormone':ti,ab OR 'adrenocorticotropin':ti,ab OR 'corticotropin':ti,ab OR 'ACTH':ti,ab) AND

('Child'/de OR 'Infant'/de OR 'Adolescent'/de OR 'preschool child'/exp OR 'child':ti,ab OR 'infant':ti,ab OR 'adolescent' OR 'children' OR 'infants' OR 'adolescents' OR 'pediatric patient' OR 'pediatric patients' OR 'adolescence' OR 'youth' OR 'youths' OR 'juvenile'/exp OR 'juvenile' OR 'childhood' OR 'teenager' OR 'teenagers' OR 'teen' OR 'teens' OR 'preschool child' OR 'neonate' OR 'newborn'/de OR 'newborn':ti,ab OR 'baby' OR 'babies' OR 'pediatric':ti,ab OR 'pediatrics':ti,ab OR 'paediatric':ti,ab OR 'paediatrics':ti,ab OR 'toddler'/exp OR 'toddler' OR 'toddlers')

AND

('Outcome Assessment'/exp OR 'Critical Care Outcome'/exp OR 'mortality'/exp OR 'length of stay'/exp OR 'quality of life'/exp OR 'outcome' OR 'mortality' OR 'length of stay' OR 'LOS' OR 'quality of life' OR 'PedsQL' OR 'functional morbidity' OR 'PCPC' OR 'pediatric cerebral performance category' OR 'POPC' OR 'pediatric overall performance category' OR 'FSS' OR 'functional status scale' OR 'WeeFIM' OR 'PEDI' OR ('pediatric evaluation' AND 'disability inventory')) OR 'MSEL' OR 'mullen scales' OR 'WISC':ti,ab OR 'wechsler intelligence scale' OR 'BSID' OR 'bayley scales' OR 'VABS' OR 'vineland adaptive behavior scale' OR 'Depression assessment'/exp OR 'depression':ti,ab OR 'PTSD' OR 'post-traumatic stress disorder' OR 'post-traumatic stress' OR 'posttraumatic stress disorder'/exp OR 'acute stress disorder'/exp OR 'acute stress disorder' OR 'acute traumatic stress disorder' OR 'tracheostomy'/exp OR 'tracheostomy' OR 'Gastrostomy'/exp OR 'gastrostomy' OR 'stomach tube'/exp OR 'gastric tube' OR 'NPMODS' OR 'progressive multiple organ dysfunction' OR 'organ dysfunction resolution' OR 'cost of medical care' OR 'health care costs'/exp OR 'symptom improvement' OR 'duration of life' OR 'quality of dying' OR 'quality of death' OR 'Quality adjusted life year'/exp OR 'neurocognitive' OR 'neuro-cognitive' OR 'neuro cognitive' OR 'neurocognition' OR 'neurodevelopmental' OR 'neuro-developmental' OR 'neuro developmental' OR

'neurodevelopment' OR 'neuro-development' OR 'neuro development' OR 'neurologic' OR 'neurological' OR 'cognitive' OR 'HRQOL' OR 'functional outcome' OR 'functional outcomes' OR 'pediatric stroke outcome measures' OR 'Glasgow Outcome Score' OR 'GOS' OR 'extracorporeal life support' OR ('waiting lists' AND 'heart transplantation'/exp) OR 'extracorporeal oxygenation'/exp OR 'extracorporeal membrane oxygenation' OR 'ECMO' OR 'mechanical circulatory support' OR 'left ventricular assist device' OR 'LVAD' OR 'ventilator free' OR 'VFD' OR 'inotrope dependency' OR 'mechanical support' OR 'seizure'/exp OR 'seizure' OR 'seizures' OR 'pedNIHSS' OR 'pediatric NIH Stroke Scale' OR 'neurologic disability' OR 'neurological disability')

AND

('predictive value'/exp OR 'sensitivity and specificity'/exp OR 'False Negative result'/exp OR 'False Positive result'/exp OR 'specificity' OR 'false negative' OR 'false positive' OR 'predict' OR 'predicting' OR 'predictive' OR 'prediction' OR 'predictor' OR 'accurate' OR 'accuracy' OR 'precision' OR 'precise' OR 'validity' OR 'reliability' OR 'discrimination' OR 'calibration' OR 'sensitivity to change' OR 'goodness of fit')

NOT ('editorial'/it OR 'letter'/it OR 'note'/it OR 'review'/it OR 'chapter'/it OR 'conference abstract'/it OR 'Thyroid cancer'/exp OR 'persistent hyperinsulinemic hypoglycemia of infancy'/exp OR 'congenital hypothyroidism'/exp OR 'thyroid nodule'/exp OR 'inhaled corticosteroids'/exp OR 'asthma'/exp OR 'non insulin dependent diabetes mellitus'/exp OR 'topical corticosteroids':ti,ab OR 'antenatal corticosteroids':ti,ab OR 'intraarticular corticosteroid injections':ti,ab OR 'transtympanic steroid injection':ti,ab OR 'ultrasound-guided corticosteroid injection':ti,ab OR 'prenatal steroids':ti,ab OR 'intralesional steroids':ti,ab OR 'steriod ointment':ti,ab OR 'nasal steroids':ti,ab OR 'dental corticosteroids':ti,ab OR 'maternal thyroid':ti,ab OR 'primary hypothyroidism':ti,ab OR 'primary hyperthyroidism':ti,ab)

Searched 12/19/2017, 4,798 results

Searched 1/6/2020, 1233 results

### Immune system dysfunction

12/22/2017 search

Total results: 7838

Duplicate results: 1521

Unique results for import to Covidence: 6317

Covidence duplicates: 23

Total for title/abstract screening: 6294

1/7/2020 update (2017-2020)

Total results: 2030

Duplicate results: 347

Unique results for import to Covidence: 1683

Covidence duplicates: 422

Total for title/abstract screening: 1261

#### Pubmed:

("immune system dysregulation"[tw] OR "immune cell dysfunction"[tw] OR "immunoparalysis"[tw] OR "immune paralysis"[tw] OR "immunosuppression"[mh] OR "immunosuppression"[tw] OR "immune suppression"[tw] OR "lymphocyte depletion"[mh] OR "lymphoid depletion"[tw] OR "HLA-DR"[tw] OR "human leukocyte antigen"[tw] OR "HLA DR Antigens"[mh] OR "HLA-DRB1"[tw] OR "HLA-DRB3"[tw] OR "HLA-DRB4"[tw] OR "HLA-DRB5"[tw] OR "HLA-DR1"[tw] OR "HLA-DR2"[tw] OR "HLA-DR3"[tw] OR "HLA-DR4"[tw] OR "HLA-DR5"[tw] OR "HLA-DR6"[tw] OR "HLA-DR7"[tw] OR "Cytokines"[mh] OR "cytokine"[tw] OR "cytokines"[tw] OR "interleukins"[mh] OR "interleukin"[tw] OR "interleukins"[tw] OR "IL-1"[tw] OR "IL-1a"[tw] OR "IL-1alpha"[tw] OR "IL-1b"[tw] OR "IL-1beta"[tw] OR "IL-10"[tw] OR "IL-11"[tw] OR "IL-12"[tw] OR "IL-13"[tw] OR "IL-15"[tw] OR "IL-16"[tw] OR "IL-17"[tw] OR "IL-18"[tw] OR "IL-2"[tw] OR "IL-23"[tw] OR "IL-27"[tw] OR "IL-3"[tw] OR "IL-33"[tw] OR "IL-4"[tw] OR "IL-5"[tw] OR "IL-6"[tw] OR "IL-7"[tw] OR "IL-8"[tw] OR "IL-9"[tw] OR "lipopolysaccharides"[mh] OR "lipopolysaccharide"[tw] OR "lipopolysaccharides"[tw] OR "LPS"[tw] OR "lipid A"[mh] OR "lipid A"[tw] OR "O Antigens"[mh] OR "O antigens"[tw] OR "O antigen"[tw] OR "myeloid-derived suppressor cells"[mh] OR "myeloid-derived suppressor cell"[tw] OR "myeloid-derived suppressor cells"[tw] OR "MDSC"[tw] OR "MDSCs"[tw] OR "T-Lymphocytes, Regulatory"[mh] OR "regulatory t-lymphocytes"[tw] OR "regulatory t-lymphocyte"[tw] OR "regulatory t cell"[tw] OR "regulatory t cells"[tw] OR "Treg"[tw] OR "Tumor Necrosis Factors"[mh:noexp] OR "tumor necrosis factor"[tw] OR "tumour necrosis factor"[tw] OR "tumor necrosis factors"[tw] OR "tumour necrosis factors"[tw] OR "tumor necrosis factor-alpha"[mh] OR "tumor necrosis factor-alpha"[tw] OR "tumour necrosis factor-alpha"[tw] OR "tumor necrosis factor α"[tw] OR "tumour necrosis factor α"[tw] OR "TNF-alpha"[tw] OR "TNFα"[tw] OR "TNF α"[tw] OR "lymphocyte count"[mh] OR "lymphocyte count"[tw] OR "lymphopenia"[mh] OR "lymphopenia"[tw] OR "lymphocytopenia"[tw] OR "Leukocytes, Mononuclear"[mh] OR "mononuclear leukocytes"[tw] OR

"mononuclear cells"[tw] OR "mononuclear cell"[tw] OR "blood protein disorders"[mh] OR "blood protein disorders"[tw] OR "blood protein disorder"[tw] OR "agammaglobulinemia"[mh] OR "agammaglobulinemia"[tw] OR "dysgammaglobulinemia"[mh] OR "dysgammaglobulinemia"[tw] OR "hyper-IgM Immunodeficiency Syndrome"[tw] OR "hyper-IgM immunodeficiency syndrome"[tw] OR "IgA deficiency"[mh] OR "IgA deficiency"[tw] OR "IgG Deficiency"[mh] OR "IgG deficiency"[tw] OR "hypergammaglobulinemia"[mh] OR "hypergammaglobulinemia"[tw] OR "mevalonate kinase deficiency"[mh] OR "mevalonate kinase deficiency"[tw] OR "monoclonal gammopathy of undetermined significance"[mh] OR "paraproteinemia"[mh] OR "paraproteinemia"[tw] OR "paraproteinemia"[tw] OR "cryoglobulinemia"[mh] OR "cryoglobulinemia"[tw] OR "heavy chain disease"[mh] OR "heavy chain disease"[tw] OR "immunoproliferative small intestinal disease"[mh] OR "immunoproliferative small intestinal disease"[tw] OR "immunoproliferative small intestinal disorder"[tw] OR "POEMS syndrome"[mh] OR "POEMS syndrome"[tw] OR "Waldenstrom Macroglobulinemia"[mh] OR "waldenstrom macroglobulinemia"[tw] OR "waldenstroem macroglobulinemia"[tw])

AND

("Child"[mh] OR "Infant"[mh:noexp] OR "Infant, Newborn"[mh:noexp] OR "infant, low birth weight"[mh] OR "infant, postmature"[mh] OR "Adolescent"[mh] OR "Child, Preschool"[mh] OR "child"[tiab] OR "infant"[all] OR "adolescent"[all] OR "children"[all] OR "infants"[all] OR "adolescents"[all] OR "pediatric patient"[all] OR "pediatric patients"[all] OR "adolescence"[all] OR "youth"[all] OR "youths"[all] OR "juvenile"[all] OR "childhood"[all] OR "teenager"[all] OR "teenagers"[all] OR "teen"[all] OR "teens"[all] OR "preschool child"[all] OR "neonate"[all] OR "newborn"[all] OR "baby"[all] OR "babies"[all] OR "pediatric"[tiab] OR "pediatrics"[tiab] OR "paediatric"[tiab] OR "paediatrics"[tiab] OR "toddler"[all] OR "toddlers"[all])

AND

("Patient Outcome Assessment"[mh] OR "Critical Care Outcomes"[mh] OR "mortality"[mh] OR "length of stay"[mh] OR "quality of life"[mh] OR "outcome"[tw] OR "mortality"[tw] OR "length of stay"[tw] OR "LOS"[tw] OR "quality of life"[tw] OR "PedsQL"[tw] OR "functional morbidity"[tw] OR "PCPC"[tw] OR "pediatric cerebral performance category"[tw] OR "POPC"[tw] OR "pediatric overall performance category"[tw] OR "FSS"[tw] OR "functional status scale"[tw] OR "WeeFIM"[tw] OR "PEDI"[tw] OR ("pediatric evaluation" AND "disability inventory") OR "MSEL"[tw] OR "mullen scales"[tw] OR "WISC"[tiab] OR "wechsler intelligence scale"[tw] OR "BSID"[tw] OR "bayley scales"[tw] OR "VABS"[tw] OR "vineland adaptive behavior scale"[tw] OR "Depression/diagnosis"[mh] OR "depression"[tiab] OR "PTSD"[tw] OR "post-traumatic stress disorder"[tw] OR "post-traumatic stress"[tw] OR "Stress Disorders, Post-Traumatic"[mh] OR "Stress Disorders, Traumatic, Acute"[mh] OR "acute stress disorder"[tw] OR "acute traumatic stress disorder"[tw] OR "tracheostomy"[mh] OR "tracheostomy"[tw] OR "Gastrostomy"[mh] OR "gastrostomy"[tw] OR "gastric tube"[tw] OR "NPMODS"[tw] OR "incidence of MODS"[tw] OR "multiple organ dysfunction"[tw] OR "organ dysfunction resolution"[tw] OR "organ-failure free"[tw] OR "cost of medical care"[tw] OR "health care costs"[mh] OR "symptom improvement"[tw] OR "duration of life"[tw] OR "quality of dying"[tw] OR "quality of death"[tw] OR "Quality-adjusted life years"[mh] OR "neurocognitive"[tw] OR "neuro-cognitive"[tw] OR "neuro cognitive"[tw] OR "neurocognition"[tw] OR "neurodevelopmental"[tw] OR "neuro-developmental"[tw] OR "neuro developmental"[tw] OR "neurodevelopment"[tw] OR "neuro-development"[tw] OR "neuro development"[tw] OR "neurologic"[tw] OR "neurological"[tw] OR "cognitive"[tw] OR "HRQOL"[tw] OR "functional outcome"[tw] OR "functional outcomes"[tw] OR "pediatric stroke outcome measures"[tw] OR "Glasgow Outcome Score"[tw] OR "GOS"[tw] OR "extracorporeal life support"[tw] OR ("waiting lists"[mh] AND "heart transplantation"[mh]) OR "extracorporeal membrane oxygenation"[mh] OR "extracorporeal membrane oxygenation"[tw] OR "ECMO"[tw] OR "mechanical circulatory support"[tw] OR "left ventricular assist device"[tw] OR "LVAD"[tw] OR "ventilator free"[tw] OR "VFD"[tw] OR "inotrope dependency"[tw] OR "mechanical support"[tw] OR "seizures"[mh] OR "seizure"[tw] OR "seizures"[tw] OR "pedNiHSS"[tw] OR "pediatric NIH Stroke Scale"[tw] OR "neurologic disability"[tw] OR "neurological disability"[tw] OR "hospital acquired infection"[tw] OR "nosocomial infection"[tw])

AND

("predictive value of tests"[mh] OR "sensitivity and specificity"[mh] OR "False Negative Reactions"[mh] OR "False Positive Reactions"[mh] OR "specificity" OR "false negative" OR "false positive" OR "predict" OR "predicting" OR "predictive" OR "prediction" OR "predictor" OR "accurate" OR "accuracy" OR "precision" OR "precise" OR "validity" OR "reliability" OR "discrimination" OR "calibration" OR "sensitivity to change" OR "goodness of fit")

NOT (“editorial”[pt] OR “guideline”[pt] OR “letter”[pt] OR “review”[pt] OR “meta-analysis”[pt])

NOT (“animals”[mesh] NOT (“animals”[mesh] AND “humans”[mesh]))

Searched 12/22/2017, 3432 results

Searched 1/7/2020, 753 results

**Embase:**

('immune system dysregulation':ti,ab OR 'immune cell dysfunction':ti,ab OR 'immunoparalysis':ti,ab OR 'immune paralysis':ti,ab OR 'immunosuppressive treatment'/exp OR 'immunosuppression':ti,ab OR 'immune suppression':ti,ab OR 'lymphocyte depletion'/exp OR 'lymphoid depletion':ti,ab OR 'HLA-DR':ti,ab OR 'human leukocyte antigen':ti,ab OR 'HLA DR Antigen'/exp OR 'HLA-DRB1':ti,ab OR 'HLA-DRB3':ti,ab OR 'HLA-DRB4':ti,ab OR 'HLA-DRB5':ti,ab OR 'HLA-DR1':ti,ab OR 'HLA-DR2':ti,ab OR 'HLA-DR3':ti,ab OR 'HLA-DR4':ti,ab OR 'HLA-DR5':ti,ab OR 'HLA-DR6':ti,ab OR 'HLA-DR7':ti,ab OR 'Cytokine'/exp OR 'cytokine':ti,ab OR 'cytokines':ti,ab OR 'interleukin derivative'/exp OR 'interleukin':ti,ab OR 'interleukins':ti,ab OR 'IL-1':ti,ab OR 'IL-1a':ti,ab OR 'IL-1alpha':ti,ab OR 'IL-1b':ti,ab OR 'IL-1beta':ti,ab OR 'IL-10':ti,ab OR 'IL-11':ti,ab OR 'IL-12':ti,ab OR 'IL-13':ti,ab OR 'IL-15':ti,ab OR 'IL-16':ti,ab OR 'IL-17':ti,ab OR 'IL-18':ti,ab OR 'IL-2':ti,ab OR 'IL-23':ti,ab OR 'IL-27':ti,ab OR 'IL-3':ti,ab OR 'IL-33':ti,ab OR 'IL-4':ti,ab OR 'IL-5':ti,ab OR 'IL-6':ti,ab OR 'IL-7':ti,ab OR 'IL-8':ti,ab OR 'IL-9':ti,ab OR 'lipopolysaccharide'/exp OR 'lipopolysaccharide':ti,ab OR 'lipopolysaccharides':ti,ab OR 'LPS':ti,ab OR 'lipid A'/exp OR 'lipid A':ti,ab OR 'O Antigens'/exp OR 'O antigens':ti,ab OR 'O antigen':ti,ab OR 'myeloid-derived suppressor cell'/exp OR 'myeloid-derived suppressor cell':ti,ab OR 'myeloid-derived suppressor cells':ti,ab OR 'MDSC':ti,ab OR 'MDSCs':ti,ab OR 'regulatory T Lymphocyte'/exp OR 'regulatory t-lymphocytes':ti,ab OR 'regulatory t-lymphocyte':ti,ab OR 'regulatory t cell':ti,ab OR 'regulatory t cells':ti,ab OR 'Treg':ti,ab OR 'Tumor Necrosis Factor'/exp OR 'tumor necrosis factor':ti,ab OR 'tumour necrosis factor':ti,ab OR 'tumor necrosis factors':ti,ab OR 'tumour necrosis factors':ti,ab OR 'tumor necrosis factor-alpha':ti,ab OR 'tumour necrosis factor-alpha':ti,ab OR 'tumor necrosis factor α':ti,ab OR 'tumour necrosis factor α':ti,ab OR 'TNF-alpha':ti,ab OR 'TNFα':ti,ab OR 'TNF α':ti,ab OR 'lymphocyte count'/exp OR 'lymphocyte count':ti,ab OR 'lymphocytopenia'/exp OR 'lymphopenia':ti,ab OR 'lymphocytopenia':ti,ab OR 'mononuclear cell'/exp OR 'mononuclear leukocytes':ti,ab OR 'mononuclear cells':ti,ab OR 'mononuclear cell':ti,ab OR 'blood protein disorders'/exp OR 'blood protein disorders':ti,ab OR 'blood protein disorder':ti,ab OR 'agammaglobulinemia'/exp OR 'agammaglobulinemia':ti,ab OR 'dysgammaglobulinemia'/exp OR 'dysgammaglobulinemia':ti,ab OR 'hyper IgM syndrome'/exp OR 'hyper-IgM Immunodeficiency Syndrome':ti,ab OR 'hyper-IgM immunodeficiency syndrome':ti,ab OR 'Immunoglobulin A deficiency'/exp OR 'IgA deficiency':ti,ab OR 'Immunoglobulin G Deficiency'/exp OR 'IgG deficiency':ti,ab OR 'hypergammaglobulinemia'/exp OR 'hypergammaglobulinemia':ti,ab OR 'mevalonate kinase deficiency'/exp OR 'mevalonate kinase deficiency':ti,ab OR 'monoclonal immunoglobulinemia'/exp OR 'paraproteinemia'/exp OR 'paraproteinemia':ti,ab OR 'paraproteinemias':ti,ab OR 'cryoglobulinemia'/exp OR 'cryoglobulinemia':ti,ab OR 'heavy chain disease'/exp OR 'heavy chain disease':ti,ab OR 'immunoproliferative small intestinal disease'/exp OR 'immunoproliferative small intestinal disease':ti,ab OR 'immunoproliferative small intestinal disorder':ti,ab OR 'POEMS syndrome'/exp OR 'POEMS syndrome':ti,ab OR 'Waldenstrom Macroglobulinemia'/exp OR 'waldenstrom':ti,ab OR 'waldenstrom macroglobulinema':ti,ab)

AND

('Child'/de OR 'Infant'/de OR 'Adolescent'/de OR 'preschool child'/exp OR 'child':ti,ab OR 'infant':ti,ab OR 'adolescent' OR 'children' OR 'infants' OR 'adolescents' OR 'pediatric patient' OR 'pediatric patients' OR 'adolescence' OR 'youth' OR 'youths' OR 'juvenile'/exp OR 'juvenile' OR 'childhood' OR 'teenager' OR 'teenagers' OR 'teen' OR 'teens' OR 'preschool child' OR 'neonate' OR 'newborn'/de OR 'newborn':ti,ab OR 'baby' OR 'babies' OR 'pediatric':ti,ab OR 'pediatrics':ti,ab OR 'paediatric':ti,ab OR 'paediatrics':ti,ab OR 'toddler'/exp OR 'toddler' OR 'toddlers')

AND

('Outcome Assessment'/exp OR 'Critical Care Outcome'/exp OR 'mortality'/exp OR 'length of stay'/exp OR 'quality of life'/exp OR 'outcome' OR 'mortality' OR 'length of stay' OR 'LOS' OR 'quality of life' OR 'PedsQL' OR 'functional morbidity' OR 'PCPC' OR 'pediatric cerebral performance category' OR 'POPC' OR 'pediatric overall performance category' OR 'FSS' OR 'functional status scale' OR 'WeeFIM' OR 'PEDI' OR ('pediatric evaluation' AND 'disability inventory') OR 'MSEL' OR 'mullen scales' OR 'WISC':ti,ab OR 'wechsler intelligence scale' OR 'BSID' OR 'bayley scales' OR 'VABS' OR 'vineland adaptive behavior scale' OR



'Depression assessment'/exp OR 'depression':ti,ab OR 'PTSD' OR 'post-traumatic stress disorder' OR 'post-traumatic stress' OR 'posttraumatic stress disorder'/exp OR 'acute stress disorder'/exp OR 'acute stress disorder' OR 'acute traumatic stress disorder' OR 'tracheostomy'/exp OR 'tracheostomy' OR 'Gastrostomy'/exp OR 'gastrostomy' OR 'stomach tube'/exp OR 'gastric tube' OR 'NPMODS' OR 'incidence of MODS' OR 'multiple organ dysfunction' OR 'organ dysfunction resolution' OR 'organ failure free' OR 'cost of medical care' OR 'health care costs'/exp OR 'symptom improvement' OR 'duration of life' OR 'quality of dying' OR 'quality of death' OR 'Quality adjusted life year'/exp OR 'neurocognitive' OR 'neuro-cognitive' OR 'neuro cognitive' OR 'neurocognition' OR 'neurodevelopmental' OR 'neuro-developmental' OR 'neuro developmental' OR 'neurodevelopment' OR 'neuro-development' OR 'neuro development' OR 'neurologic' OR 'neurological' OR 'cognitive' OR 'HRQOL' OR 'functional outcome' OR 'functional outcomes' OR 'pediatric stroke outcome measures' OR 'Glasgow Outcome Score' OR 'GOS' OR 'extracorporeal life support' OR ('waiting lists' AND 'heart transplantation'/exp) OR 'extracorporeal oxygenation'/exp OR 'extracorporeal membrane oxygenation' OR 'ECMO' OR 'mechanical circulatory support' OR 'left ventricular assist device' OR 'LVAD' OR 'ventilator free' OR 'VFD' OR 'inotrope dependency' OR 'mechanical support' OR 'seizure'/exp OR 'seizure' OR 'seizures' OR 'pedNiHSS' OR 'pediatric NIH Stroke Scale' OR 'neurologic disability' OR 'neurological disability' OR 'hospital acquired infection' OR 'nosocomial infection')

AND

('predictive value'/exp OR 'sensitivity and specificity'/exp OR 'False Negative result'/exp OR 'False Positive result'/exp OR 'specificity' OR 'false negative' OR 'false positive' OR 'predict' OR 'predicting' OR 'predictive' OR 'prediction' OR 'predictor' OR 'accurate' OR 'accuracy' OR 'precision' OR 'precise' OR 'validity' OR 'reliability' OR 'discrimination' OR 'calibration' OR 'sensitivity to change' OR 'goodness of fit')

NOT ('editorial'/it OR 'letter'/it OR 'note'/it OR 'review'/it OR 'chapter'/it OR 'conference abstract'/it)

NOT ('animal'/exp NOT ('animal'/exp AND 'human'/exp))

Searched 12/22/2017, 4406 results  
Searched 1/7/2020, 1277 results

### Endothelial dysfunction

12/21/2017 search

Total references: 1179

Duplicate references: 269

Unique references for import to Covidence: 910

Deduped on import to Covidence: 3

References for title/abstract screening: 907

1/10/2020 update (2017-2020)

Total references: 282

Duplicate references: 52

Unique references for import to Covidence: 230

Deduped on import to Covidence: 66

References for title/abstract screening: 164

#### Pubmed:

("endothelial function" OR "endothelial dysfunction" OR "Endothelial activation" OR "Angiopoietins"[mh] OR "angiopoietin-2"[mh] OR "angiopoietin-1"[mh] OR "angiopoietin" OR "angiopoietins" OR "protein c"[mh] OR "protein c" OR "protein s"[mh] OR "protein s" OR "nitric oxide"[mh] OR "nitric oxide" OR "peripheral arterial tonometry" OR "flow mediated dilation" OR "reactive hyperemia index" OR "RHI" OR "vascular cell adhesion molecule-1"[mh] OR "vascular cell adhesion molecule" OR "VCAM" OR "VCAM-1" OR "Intercellular adhesion molecule-1"[mh] OR "intercellular adhesion molecule" OR "ICAM-1" OR "ICAM" OR "endothelial leukocyte adhesion molecule" OR "ELAM-1" OR "e-selectin"[mh] OR "e-selectin" OR "p-selectin"[mh] OR "p-selectin" OR "PADGEM protein")

AND

("Child"[mh] OR "Infant"[mh:noexp] OR "Infant, Newborn"[mh:noexp] OR "infant, low birth weight"[mh] OR "infant, postmature"[mh] OR "Adolescent"[mh] OR "Child, Preschool"[mh] OR "child"[tiab] OR "infant"[all] OR "adolescent"[all] OR "children"[all] OR "infants"[all] OR "adolescents"[all] OR "pediatric patient"[all] OR "pediatric patients"[all] OR "adolescence"[all] OR "youth"[all] OR "youths"[all] OR "juvenile"[all] OR "childhood"[all] OR "teenager"[all] OR "teenagers"[all] OR "teen"[all] OR "teens"[all] OR "preschool child"[all] OR "neonate"[all] OR "newborn"[all] OR "baby"[all] OR "babies"[all] OR "pediatric"[tiab] OR "pediatrics"[tiab] OR "paediatric"[tiab] OR "paediatrics"[tiab] OR "toddler"[all] OR "toddlers"[all])

AND

("Patient Outcome Assessment"[mh] OR "Critical Care Outcomes"[mh] OR "mortality"[mh] OR "length of stay"[mh] OR "quality of life"[mh] OR "outcome"[tw] OR "mortality"[tw] OR "length of stay"[tw] OR "LOS"[tw])

OR "quality of life"[tw] OR "PedsQL"[tw] OR "functional morbidity"[tw] OR "PCPC"[tw] OR "pediatric cerebral performance category"[tw] OR "POPC"[tw] OR "pediatric overall performance category"[tw] OR "FSS"[tw] OR "functional status scale"[tw] OR "WeeFIM"[tw] OR "PEDI"[tw] OR ("pediatric evaluation" AND "disability inventory") OR "MSEL"[tw] OR "mullen scales"[tw] OR "WISC"[tiab] OR "wechsler intelligence scale"[tw] OR "BSID"[tw] OR "bayley scales"[tw] OR "VABS"[tw] OR "vineland adaptive behavior scale"[tw] OR "Depression/diagnosis"[mh] OR "depression"[tiab] OR "PTSD"[tw] OR "post-traumatic stress disorder"[tw] OR "post-traumatic stress"[tw] OR "Stress Disorders, Post-Traumatic"[mh] OR "Stress Disorders, Traumatic, Acute"[mh] OR "acute stress disorder"[tw] OR "acute traumatic stress disorder"[tw] OR "tracheostomy"[mh] OR "tracheostomy"[tw] OR "Gastrostomy"[mh] OR "gastrostomy"[tw] OR "gastric tube"[tw] OR "NPMODS"[tw] OR "progressive multiple organ dysfunction"[tw] OR "organ dysfunction resolution"[tw] OR "cost of medical care"[tw] OR "health care costs"[mh] OR "symptom improvement"[tw] OR "duration of life"[tw] OR "quality of dying"[tw] OR "quality of death"[tw] OR "Quality-adjusted life years"[mh] OR "neurocognitive"[tw] OR "neuro-cognitive"[tw] OR "neuro cognitive"[tw] OR "neurocognition"[tw] OR "neurodevelopmental"[tw] OR "neuro-developmental"[tw] OR "neuro developmental"[tw] OR "neurodevelopment"[tw] OR "neuro-development"[tw] OR "neuro development"[tw] OR "neurologic"[tw] OR "neurological"[tw] OR "cognitive"[tw] OR "HRQOL"[tw] OR "functional outcome"[tw] OR "functional outcomes"[tw] OR "pediatric stroke outcome measures"[tw] OR "Glasgow Outcome Score"[tw] OR "GOS"[tw] OR "extracorporeal life support"[tw] OR ("waiting lists"[mh] AND "heart transplantation"[mh]) OR "extracorporeal membrane oxygenation"[mh] OR "extracorporeal membrane oxygenation"[tw] OR "ECMO"[tw] OR "mechanical circulatory support"[tw] OR "left ventricular assist device"[tw] OR "LVAD"[tw] OR "ventilator free"[tw] OR "VFD"[tw] OR "inotrope dependency"[tw] OR "mechanical support"[tw] OR "seizures"[mh] OR "seizure"[tw] OR "seizures"[tw] OR "pedNIHSS"[tw] OR "pediatric NIH Stroke Scale"[tw] OR "neurologic disability"[tw] OR "neurological disability"[tw])

AND

("predictive value of tests"[mh] OR "sensitivity and specificity"[mh] OR "False Negative Reactions"[mh] OR "False Positive Reactions"[mh] OR "specificity" OR "false negative" OR "false positive" OR "predict" OR "predicting" OR "predictive" OR "prediction" OR "predictor" OR "accurate" OR "accuracy" OR "precision" OR "precise" OR "validity" OR "reliability" OR "discrimination" OR "calibration" OR "sensitivity to change" OR "goodness of fit")

NOT ("editorial"[pt] OR "guideline"[pt] OR "letter"[pt] OR "review"[pt] OR "meta-analysis"[pt])

Searched 12/21/2017, 477 results

Searched 1/10/2020, 87 results

#### **Embase:**

('endothelial function' OR 'endothelial dysfunction'/exp OR 'endothelial dysfunction' OR 'Endothelial activation' OR 'Angiopoietin'/exp OR 'angiopoietin 2'/exp OR 'angiopoietin 1'/exp OR 'angiopoietin' OR 'angiopoietins' OR 'protein c'/exp OR 'protein c' OR 'protein s'/exp OR 'protein s' OR 'nitric oxide'/exp OR 'nitric oxide' OR 'peripheral arterial tonometry'/exp OR 'peripheral arterial tonometry' OR 'flow mediated dilation' OR 'reactive hyperemia index' OR 'RHI' OR 'vascular cell adhesion molecule 1'/exp OR 'vascular cell adhesion molecule' OR 'VCAM' OR 'VCAM-1' OR 'Intercellular adhesion molecule-1'/exp OR 'intercellular adhesion molecule' OR 'ICAM-1' OR 'ICAM' OR 'endothelial leukocyte adhesion molecule 1'/exp OR 'endothelial leukocyte adhesion molecule' OR 'ELAM-1' OR 'e-selectin' OR 'PADGEM protein'/exp OR 'PADGEM protein' OR 'p-selectin')

AND

('Child'/de OR 'Infant'/de OR 'Adolescent'/de OR 'preschool child'/exp OR 'child':ti,ab OR 'infant':ti,ab OR 'adolescent' OR 'children' OR 'infants' OR 'adolescents' OR 'pediatric patient' OR 'pediatric patients' OR 'adolescence' OR 'youth' OR 'youths' OR 'juvenile'/exp OR 'juvenile' OR 'childhood' OR 'teenager' OR 'teenagers' OR 'teen' OR 'teens' OR 'preschool child' OR 'neonate' OR 'newborn'/de OR 'newborn':ti,ab OR 'baby' OR 'babies' OR 'pediatric':ti,ab OR 'pediatrics':ti,ab OR 'paediatric':ti,ab OR 'paediatrics':ti,ab OR 'toddler'/exp OR 'toddler' OR 'toddlers')

AND

('Outcome Assessment'/exp OR 'Critical Care Outcome'/exp OR 'mortality'/exp OR 'length of stay'/exp OR 'quality of life'/exp OR 'outcome' OR 'mortality' OR 'length of stay' OR 'LOS' OR 'quality of life' OR 'PedsQL' OR 'functional morbidity' OR 'PCPC' OR 'pediatric cerebral performance category' OR 'POPC' OR 'pediatric

overall performance category' OR 'FSS' OR 'functional status scale' OR 'WeeFIM' OR 'PEDI' OR ('pediatric evaluation' AND 'disability inventory') OR 'MSEL' OR 'mullen scales' OR 'WISC':ti,ab OR 'wechsler intelligence scale' OR 'BSID' OR 'bayley scales' OR 'VABS' OR 'vineland adaptive behavior scale' OR 'Depression assessment'/exp OR 'depression':ti,ab OR 'PTSD' OR 'post-traumatic stress disorder' OR 'post-traumatic stress' OR 'posttraumatic stress disorder'/exp OR 'acute stress disorder'/exp OR 'acute stress disorder' OR 'acute traumatic stress disorder' OR 'tracheostomy'/exp OR 'tracheostomy' OR 'Gastrostomy'/exp OR 'gastrostomy' OR 'stomach tube'/exp OR 'gastric tube' OR 'NPMODS' OR 'progressive multiple organ dysfunction' OR 'organ dysfunction resolution' OR 'cost of medical care' OR 'health care costs'/exp OR 'symptom improvement' OR 'duration of life' OR 'quality of dying' OR 'quality of death' OR 'Quality adjusted life year'/exp OR 'neurocognitive' OR 'neuro-cognitive' OR 'neuro cognitive' OR 'neurocognition' OR 'neurodevelopmental' OR 'neuro-developmental' OR 'neuro developmental' OR 'neurodevelopment' OR 'neuro-development' OR 'neuro development' OR 'neurologic' OR 'neurological' OR 'cognitive' OR 'HRQOL' OR 'functional outcome' OR 'functional outcomes' OR 'pediatric stroke outcome measures' OR 'Glasgow Outcome Score' OR 'GOS' OR 'extracorporeal life support' OR ('waiting lists' AND 'heart transplantation'/exp) OR 'extracorporeal oxygenation'/exp OR 'extracorporeal membrane oxygenation' OR 'ECMO' OR 'mechanical circulatory support' OR 'left ventricular assist device' OR 'LVAD' OR 'ventilator free' OR 'VFD' OR 'inotrope dependency' OR 'mechanical support' OR 'seizure'/exp OR 'seizure' OR 'seizures' OR 'pedNiHSS' OR 'pediatric NIH Stroke Scale' OR 'neurologic disability' OR 'neurological disability')

AND

('predictive value'/exp OR 'sensitivity and specificity'/exp OR 'False Negative result'/exp OR 'False Positive result'/exp OR 'specificity' OR 'false negative' OR 'false positive' OR 'predict' OR 'predicting' OR 'predictive' OR 'prediction' OR 'predictor' OR 'accurate' OR 'accuracy' OR 'precision' OR 'precise' OR 'validity' OR 'reliability' OR 'discrimination' OR 'calibration' OR 'sensitivity to change' OR 'goodness of fit')

NOT ('editorial'/it OR 'letter'/it OR 'note'/it OR 'review'/it OR 'chapter'/it OR 'conference abstract'/it)

Searched 12/21/2017, 702 results

Searched 1/10/2020, 195 results

**Supplemental Table 2. PODIUM Organ Dysfunction Criteria: Voting Results by Subtopic<sup>a</sup>**

| PODIUM group  | Round #1 (n=57) |           | Round #2 (n=56) |             | Round #3 (n=53)            |             |
|---------------|-----------------|-----------|-----------------|-------------|----------------------------|-------------|
|               | Score           | Agreement | Score           | % agreement | Score                      | % agreement |
| Neurologic    | 8 [7-8]         | 46 (80.7) | NA              | NA          | NA                         | NA          |
| Respiratory   | 8 [7-8]         | 47 (82.1) | NA              | NA          | NA                         | NA          |
| CV            | 7 [6-8]         | 36 (63.2) | 7 [7-8]         | 46 (82.1)   | NA                         | NA          |
| Hepatic       | 7 [6-8]         | 35 (61.4) | 8 [7-8]         | 47 (83.9)   | NA                         | NA          |
| Renal         | 7 [6-8]         | 39 (68.4) | 8 [7-8]         | 48 (85.7)   | NA                         | NA          |
| Hematology    | 7 [6-8]         | 41 (71.9) | 8 [7-8]         | 51 (91.1)   | NA                         | NA          |
| Coagulation   | 7 [6-8]         | 38 (66.7) | 8 [7-8]         | 51 (91.1)   | NA                         | NA          |
| GI            | 7 [6-8]         | 36 (63.2) | 7 [6-8]         | 40 (71.4)   | GI hemorrhage:<br>8 [7-8]  | 41 (77.4)   |
|               |                 |           |                 |             | IAP:<br>7 [7-8]            | 42 (79.3)   |
|               |                 |           |                 |             | Bowel ischemia:<br>8 [7-9] | 49 (92.5)   |
| Endocrine     | 7 [5-8]         | 30 (52.6) | 7.5 [7-8]       | 47 (83.9)   | NA                         | NA          |
| Immune system | 8 [7-8]         | 47 (82.5) | 8 [7-8]         | 53 (94.6)   | NA                         | NA          |

PODIUM, Pediatric Organ Dysfunction Information Update Mandate; CV, Cardiovascular; GI, Gastrointestinal; IAP, intra-abdominal pressure; NA, not applicable

<sup>a</sup>Data presented as median [interquartile range] or count (frequency).
